# Supplementary material
Source: MDPI journal article supplement (https://www.mdpi.com/2073-8994/11/4/460)
Supplement: s1 [file s1]

# Symmetry in Recognition of Supramolecular Synthons–Competition between Hydrogen Bonding and Coordination Bond in Multinuclear Cu<sup>II</sup>–4f Complexes with Bicompartamental Schiff Base Ligand

Barbara Mirosław <sup>1,\*</sup>, Dariusz Osypiuk <sup>2</sup>, Beata Cristóvão and Halina Głuchowska <sup>2</sup>

<sup>1</sup> Department of Crystallography, Faculty of Chemistry, Maria Curie-Skłodowska University, Maria Curie-Skłodowska sq. 3, 20-031 Lublin, Poland; barbara.mirosław@poczta.umcs.lublin.pl

<sup>2</sup> Department of General and Coordination Chemistry, Faculty of Chemistry, Maria Curie-Skłodowska University, Maria Curie-Skłodowska sq. 2, 20-031 Lublin, Poland

\* Correspondence: barbara.mirosław@poczta.umcs.lublin.pl; Tel.: +48 81 537 55 82

## List of content:

**Figure S1.** Scatter plot of Cu···O–X(O<sub>2</sub>) angle where X = C or N (ANG1 in °) *vs* Cu···O distance (CUO in Å) up to 4 Å with marked six regions described in the text.

**Figure S2.** FTIR spectra of the **H4tehy** ligand and complex **1**.

**Figure S3.** FTIR spectra of the **H4tehy** ligand and complex **2**.

**Figure S4.** FTIR spectra of the **H4tehy** ligand and complex **3**.

**Figure S5.** TG and DSC curves of **1** in air.

**Figure S6.** TG and DSC curves of **2** in air.

**Figure S7.** TG and DSC curves of **3** in air.

**Figure S8.** The powder XRD diffractograms of the final products of decomposition in air of complexes **1–3**.

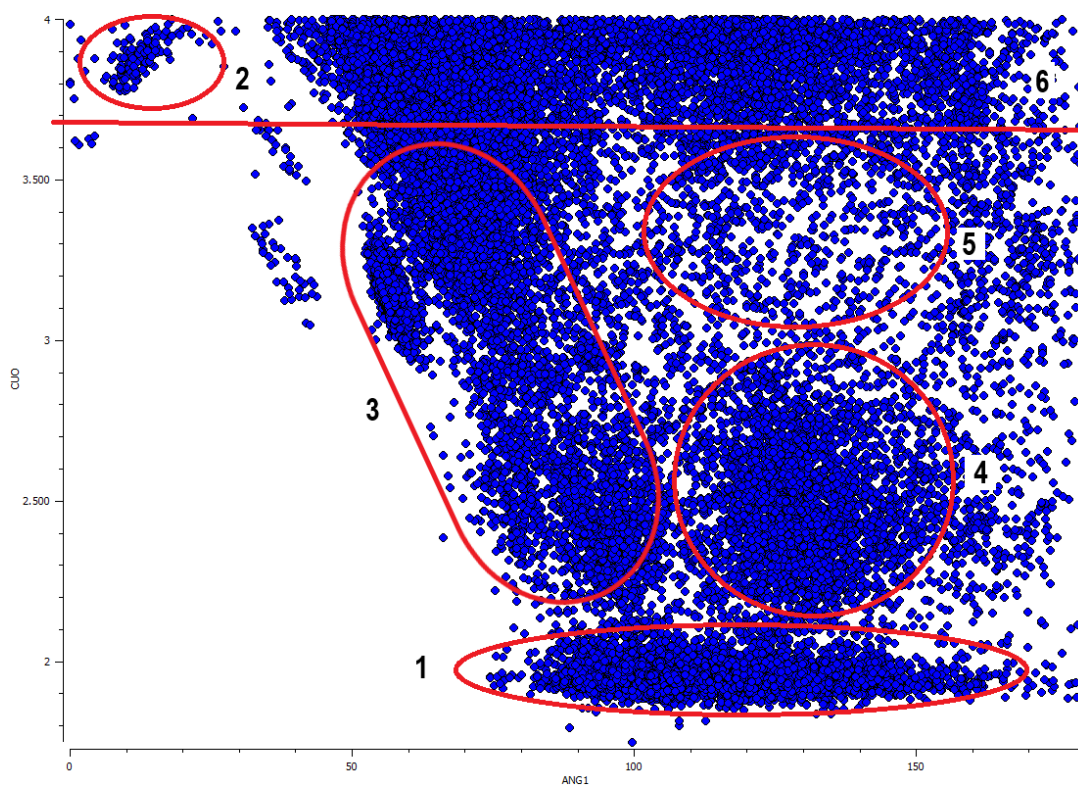

**Figure S1.** Scatter plot of Cu...O-X(O<sub>2</sub>) angle where X = C or N (ANG1 in °) vs Cu...O distance (CUO in Å) up to 4 Å with marked six regions described in the text.

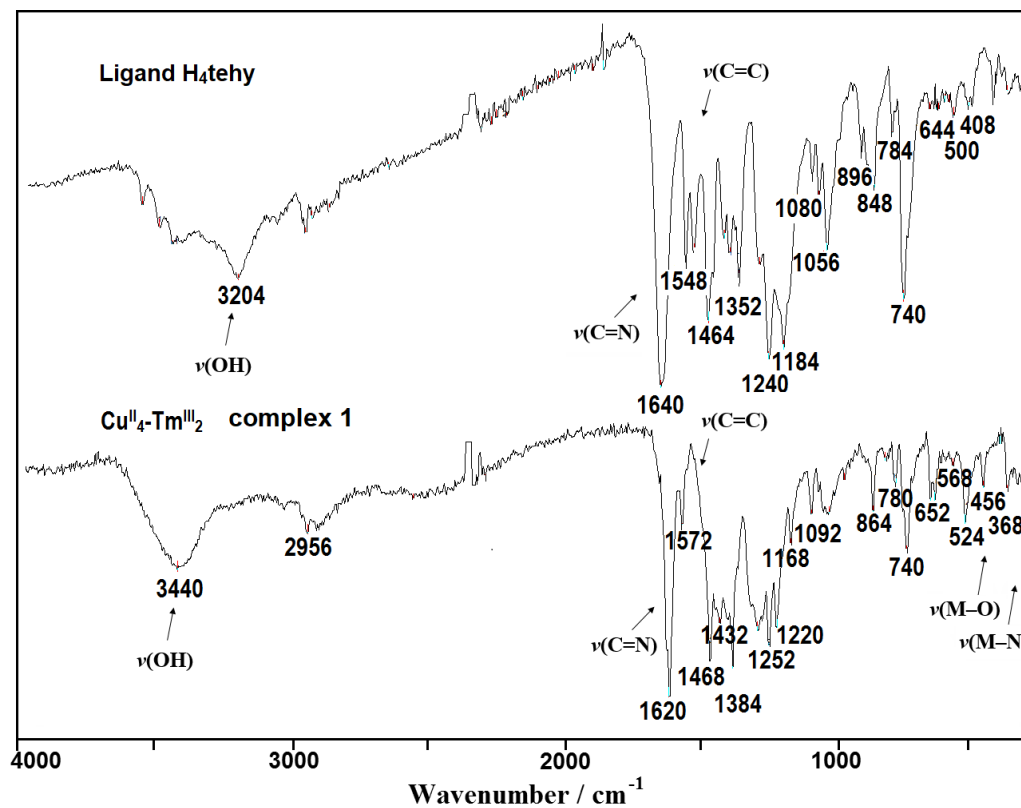

**Figure S2.** FTIR spectra of the **H<sub>4</sub>tehy** ligand and complex 1.

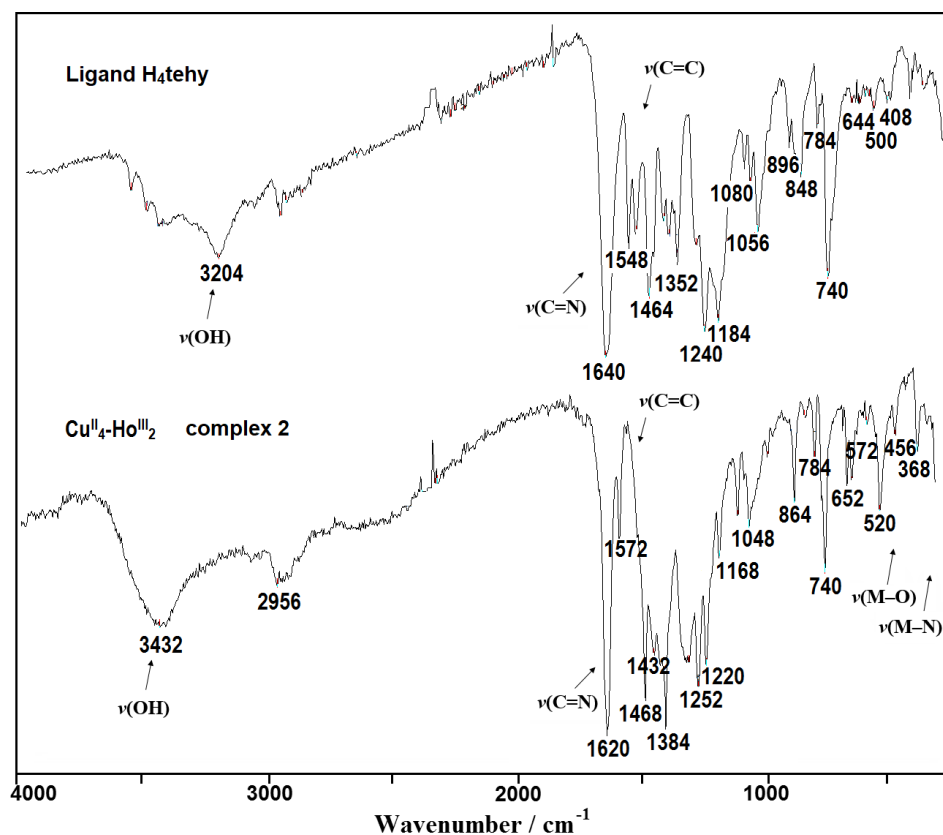

Figure S3. FTIR spectra of the **H<sub>4</sub>tehy** ligand and complex 2.

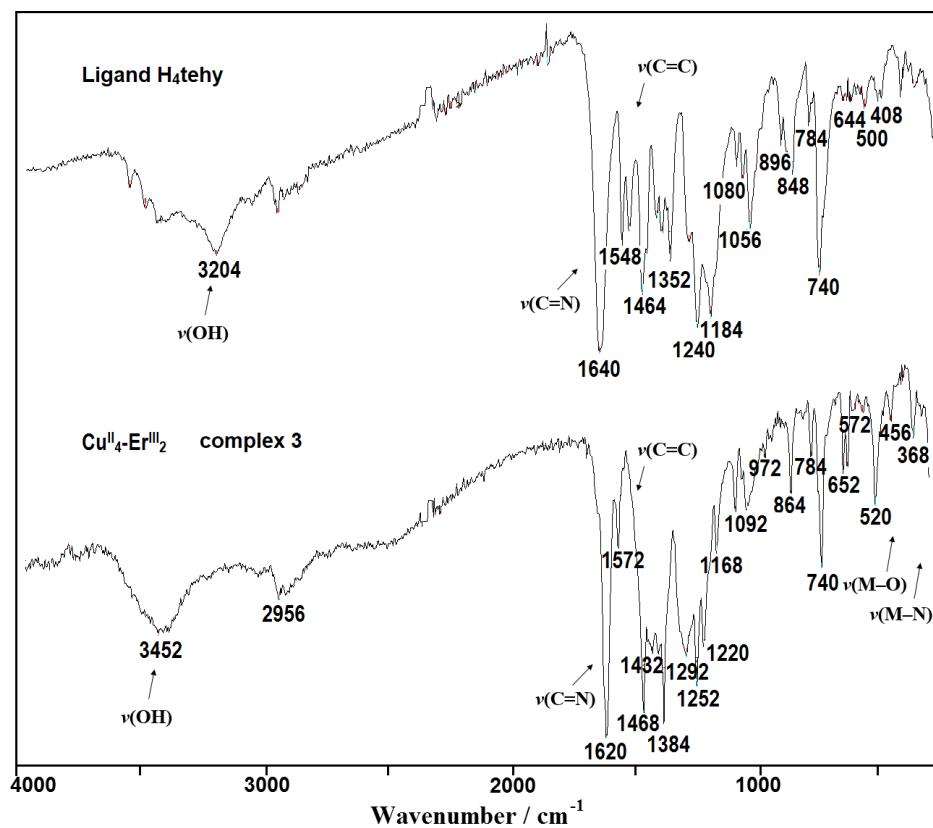

Figure S4. FTIR spectra of the **H<sub>4</sub>tehy** ligand and complex 3.

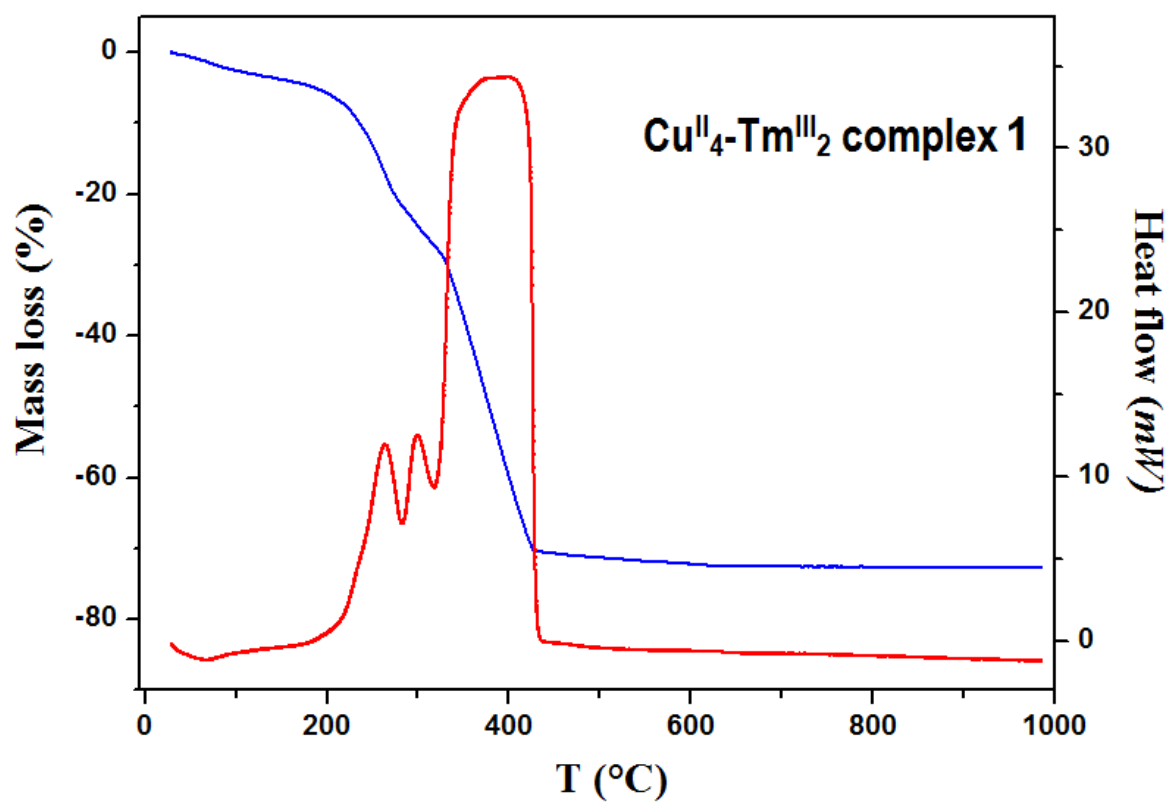

Figure S5. TG and DSC curves of 1 in air.

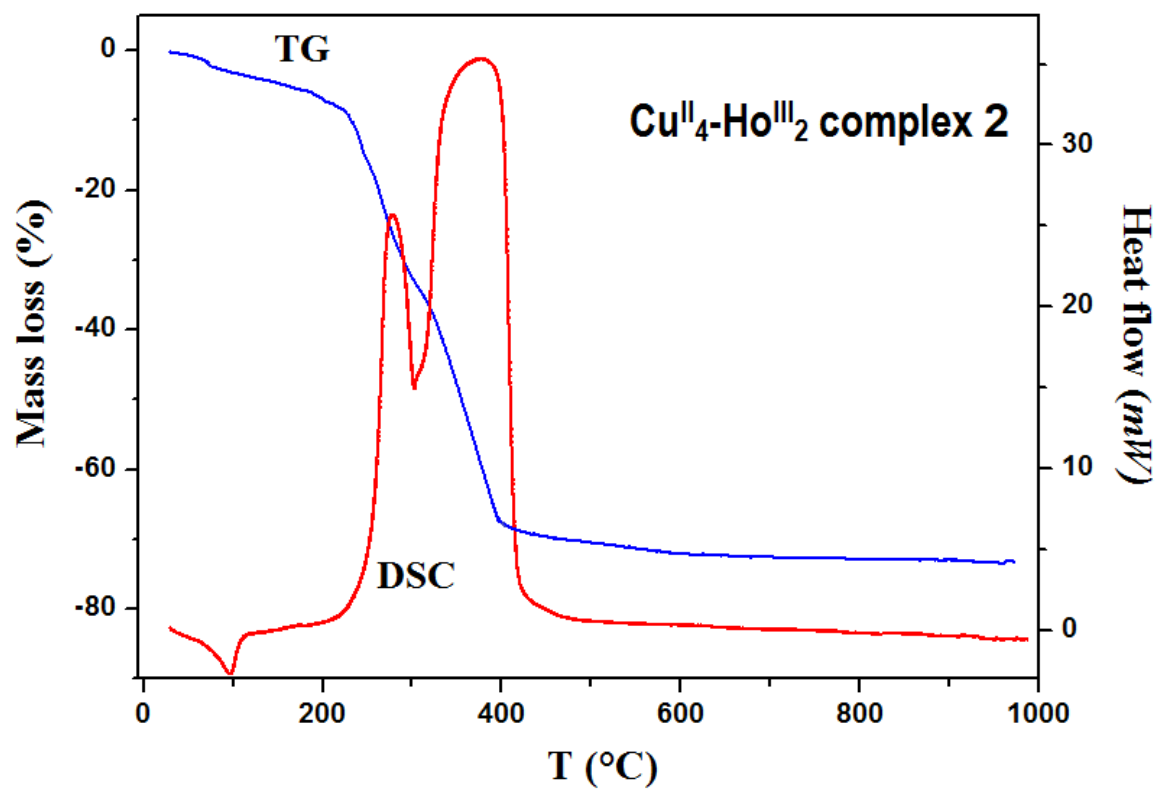

Figure S6. TG and DSC curves of 2 in air.

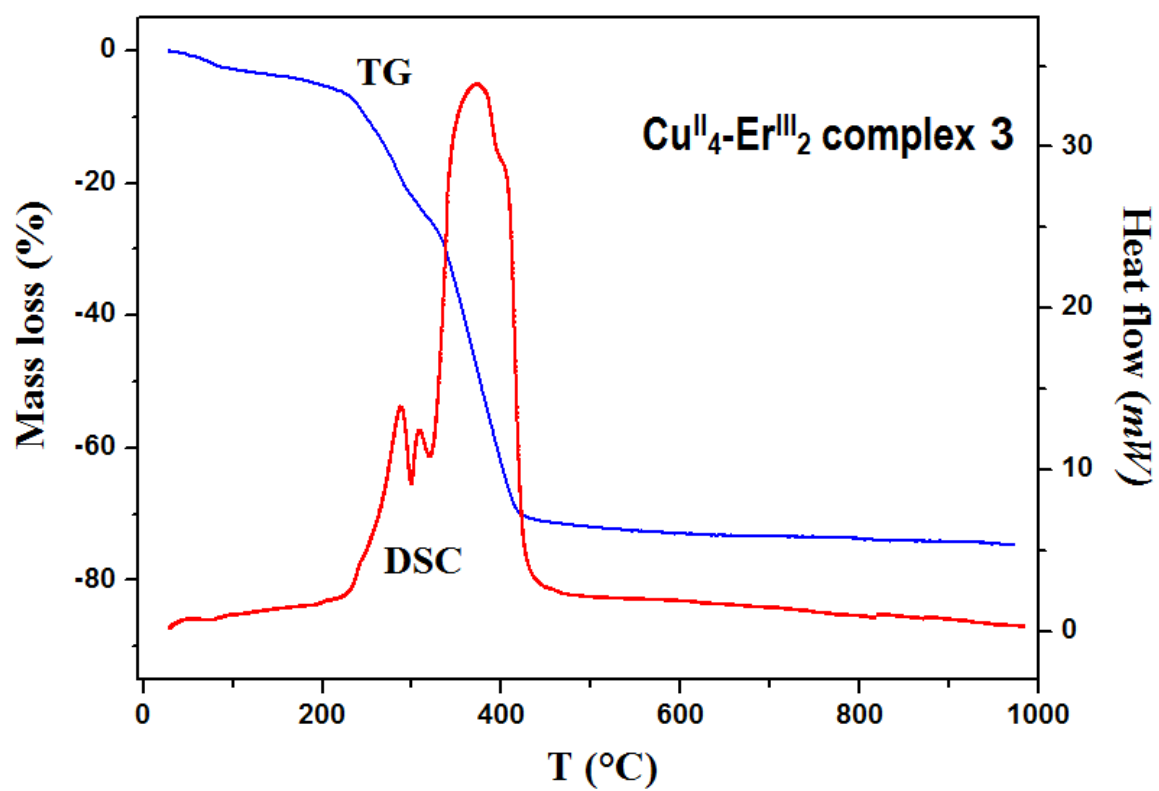

Figure S7. TG and DSC curves of 3 in air.

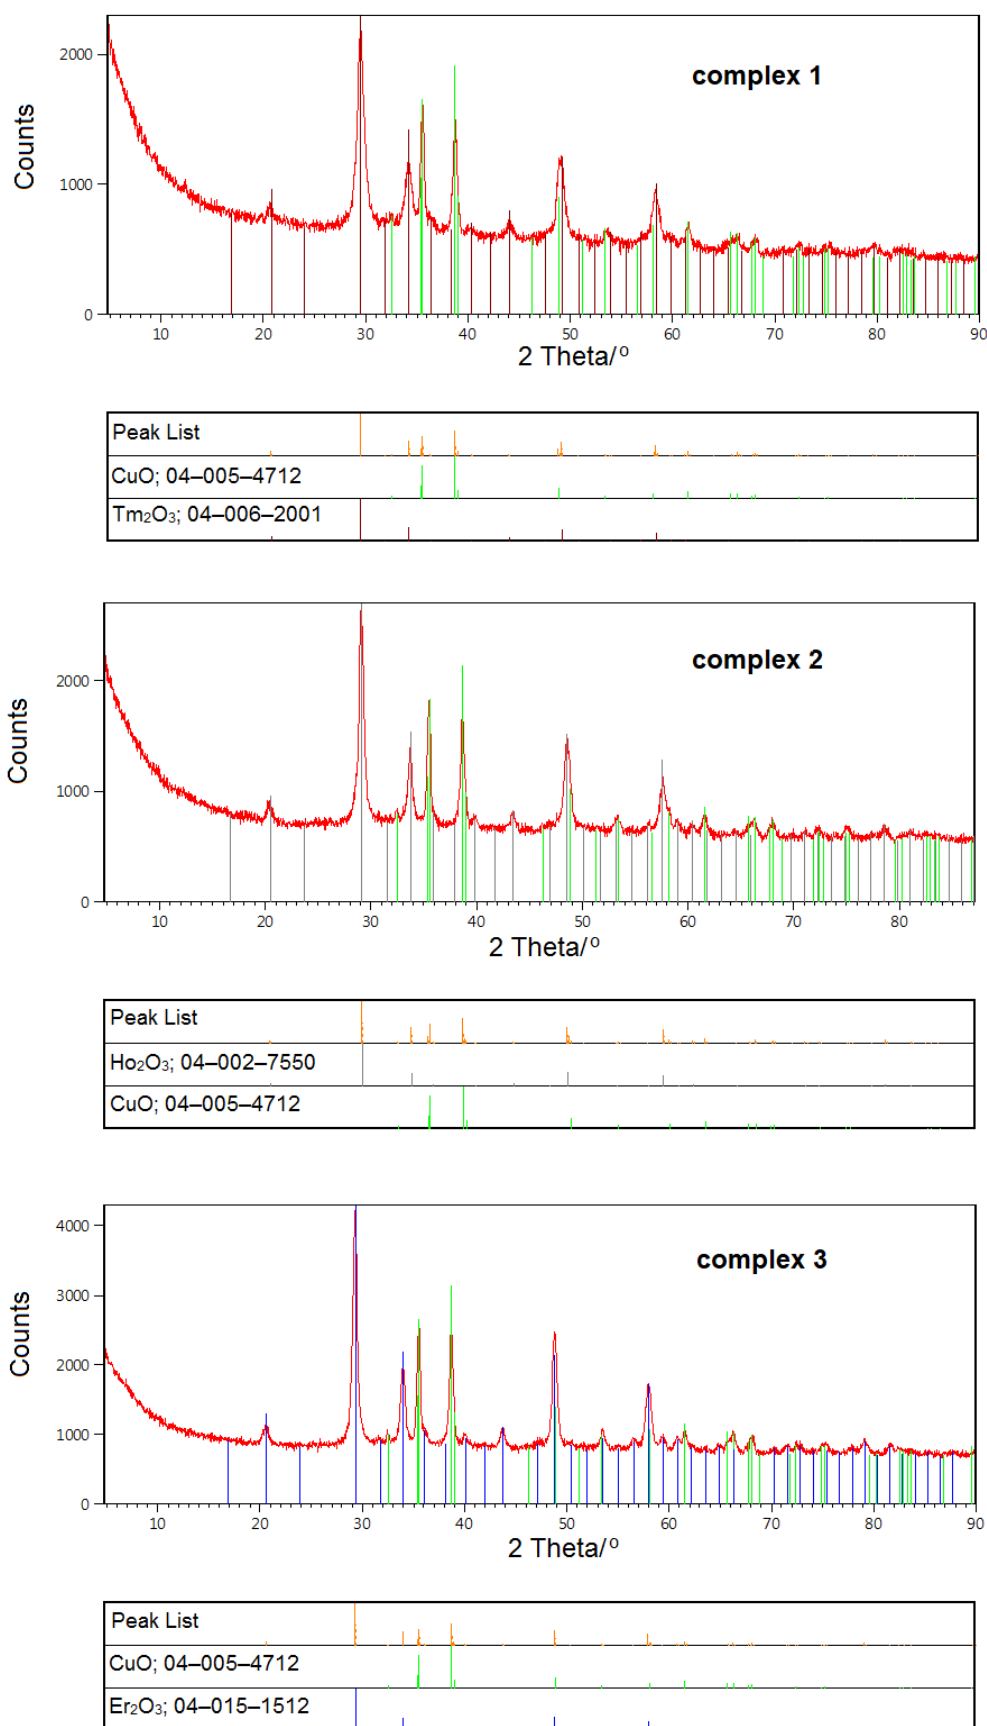

**Figure S8.** The powder XRD diffractograms of the final products of decomposition in air of the complexes **1–3**.
