# Supplementary material
Source: MDPI journal article supplement (https://www.mdpi.com/2073-8994/11/4/460)
Supplement: s1 [file s1]

Archive with 4 entries (4 files):
- 1-CuTm.cif
- 2-CuHo.cif
- 3-CuEr.cif
- Supplement.pdf
