# Supplementary material
Source: MDPI journal article supplement (https://www.mdpi.com/2073-8994/11/4/460)
Supplement: s1 [file s1 › 1-CuTm.cif]

data_1-CuTm

_chemical_name_common             ?
_chemical_name_systematic         ?
_chemical_formula_moiety          '2(C38 H40 Cu2 N4 O8 Tm), 6(N O3), H2 O'
_chemical_formula_sum             'C76 H82 Cu4 N14 O35 Tm2'
_chemical_formula_weight          2343.57
_chemical_melting_point           ?
loop_
  _atom_type_symbol
  _atom_type_description
  _atom_type_scat_dispersion_real
  _atom_type_scat_dispersion_imag
  _atom_type_scat_source
 'C' 'C' 0.0181 0.0091 'International Tables Vol C Tables 4.2.6.8 and 6.1.1.4'
 'H' 'H' 0.0000 0.0000 'International Tables Vol C Tables 4.2.6.8 and 6.1.1.4'
 'Cu' 'Cu' -1.9646 0.5888
 'International Tables Vol C Tables 4.2.6.8 and 6.1.1.4'
 'N' 'N' 0.0311 0.0180 'International Tables Vol C Tables 4.2.6.8 and 6.1.1.4'
 'O' 'O' 0.0492 0.0322 'International Tables Vol C Tables 4.2.6.8 and 6.1.1.4'
 'Tm' 'Tm' -8.0393 4.1821
 'International Tables Vol C Tables 4.2.6.8 and 6.1.1.4'

_shelx_space_group_comment
;
The symmetry employed for this shelxl refinement is uniquely defined
by the following loop, which should always be used as a source of
symmetry information in preference to the above space-group names.
They are only intended as comments.
;
_space_group_crystal_system       'monoclinic'
_space_group_IT_number            15
_space_group_name_H-M_alt         'C 1 2/c 1'
_space_group_name_Hall            '-C 2yc'
loop_
  _space_group_symop_operation_xyz
 'x, y, z'
 '-x, y, -z+1/2'
 'x+1/2, y+1/2, z'
 '-x+1/2, y+1/2, -z+1/2'
 '-x, -y, -z'
 'x, -y, z-1/2'
 '-x+1/2, -y+1/2, -z'
 'x+1/2, -y+1/2, z-1/2'

_cell_length_a                    26.0430(10)
_cell_length_b                    15.0653(4)
_cell_length_c                    22.7584(9)
_cell_angle_alpha                 90
_cell_angle_beta                  101.659(4)
_cell_angle_gamma                 90
_cell_volume                      8744.9(5)
_cell_formula_units_Z             4
_cell_measurement_reflns_used     9800
_cell_measurement_temperature     294.1(3)
_cell_measurement_theta_max       75.8010
_cell_measurement_theta_min       3.7320
_shelx_estimated_absorpt_T_max    ?
_shelx_estimated_absorpt_T_min    ?
_exptl_absorpt_coefficient_mu     5.508
_exptl_absorpt_correction_T_max   1.00000
_exptl_absorpt_correction_T_min   0.72972
_exptl_absorpt_correction_type    multi-scan
_exptl_absorpt_process_details
;
CrysAlisPro 1.171.38.46 (Rigaku Oxford Diffraction, 2015)
Empirical absorption correction using spherical harmonics,
 implemented in SCALE3 ABSPACK scaling algorithm.
;
_exptl_absorpt_special_details    ?
_exptl_crystal_colour             green
_exptl_crystal_density_diffrn     1.780
_exptl_crystal_density_meas       ?
_exptl_crystal_density_method     ?
_exptl_crystal_description        block
_exptl_crystal_F_000              4680
_exptl_crystal_size_max           0.22
_exptl_crystal_size_mid           0.2
_exptl_crystal_size_min           0.15
_exptl_transmission_factor_max    ?
_exptl_transmission_factor_min    ?
_diffrn_reflns_av_R_equivalents   0.0434
_diffrn_reflns_av_unetI/netI      0.0366
_diffrn_reflns_Laue_measured_fraction_full 0.999
_diffrn_reflns_Laue_measured_fraction_max 0.999
_diffrn_reflns_limit_h_max        25
_diffrn_reflns_limit_h_min        -31
_diffrn_reflns_limit_k_max        18
_diffrn_reflns_limit_k_min        -17
_diffrn_reflns_limit_l_max        26
_diffrn_reflns_limit_l_min        -27
_diffrn_reflns_number             29701
_diffrn_reflns_point_group_measured_fraction_full 0.999
_diffrn_reflns_point_group_measured_fraction_max 0.999
_diffrn_reflns_theta_full         67.683
_diffrn_reflns_theta_max          67.683
_diffrn_reflns_theta_min          3.407
_diffrn_ambient_environment       air
_diffrn_ambient_temperature       294.1(3)
_diffrn_detector                  'CCD plate'
_diffrn_detector_area_resol_mean  5.2763
_diffrn_detector_type             AtlasS2
_diffrn_measured_fraction_theta_full 0.999
_diffrn_measured_fraction_theta_max 0.999
_diffrn_measurement_details
;

;
_diffrn_measurement_device        'four-circle diffractometer'
_diffrn_measurement_device_type   'SuperNova, Single source at offset, AtlasS2'
_diffrn_measurement_method        '\w scans'
_diffrn_orient_matrix_type
'CrysAlisPro convention (1999,Acta A55,543-557)'
_diffrn_orient_matrix_UB_11       0.0481616000
_diffrn_orient_matrix_UB_12       -0.0081352000
_diffrn_orient_matrix_UB_13       -0.0293765000
_diffrn_orient_matrix_UB_21       -0.0204921000
_diffrn_orient_matrix_UB_22       -0.0897364000
_diffrn_orient_matrix_UB_23       -0.0276797000
_diffrn_orient_matrix_UB_31       -0.0301201000
_diffrn_orient_matrix_UB_32       0.0483569000
_diffrn_orient_matrix_UB_33       -0.0561223000
_diffrn_radiation_monochromator   mirror
_diffrn_radiation_probe           x-ray
_diffrn_radiation_type            CuK\a
_diffrn_radiation_wavelength      1.54184
_diffrn_source                    'micro-focus sealed X-ray tube'
_diffrn_source_type               'SuperNova (Cu) X-ray Source'
_reflns_Friedel_coverage          .
_reflns_Friedel_fraction_full     .
_reflns_Friedel_fraction_max      .
_reflns_number_gt                 6153
_reflns_number_total              7897
_reflns_odcompleteness_completeness 99.98
_reflns_odcompleteness_iscentric  1
_reflns_odcompleteness_theta      69.01
_reflns_special_details
;
 Reflections were merged by SHELXL according to the crystal
 class for the calculation of statistics and refinement.
 
 _reflns_Friedel_fraction is defined as the number of unique
 Friedel pairs measured divided by the number that would be
 possible theoretically, ignoring centric projections and
 systematic absences.
;
_reflns_threshold_expression      'I > 2\s(I)'
_computing_cell_refinement        'CrysAlisPro 1.171.38.46 (Rigaku OD, 2015)'
_computing_data_collection        'CrysAlisPro 1.171.38.46 (Rigaku OD, 2015)'
_computing_data_reduction         'CrysAlisPro 1.171.38.46 (Rigaku OD, 2015)'
_computing_molecular_graphics     'Olex2 (Dolomanov et al., 2009)'
_computing_publication_material   'Olex2 (Dolomanov et al., 2009)'
_computing_structure_refinement   'ShelXL-1997 (Sheldrick, 2008)'
_computing_structure_solution     'ShelXS (Sheldrick, 2008)'
_refine_diff_density_max          1.332
_refine_diff_density_min          -1.131
_refine_diff_density_rms          0.109
_refine_ls_extinction_coef        .
_refine_ls_extinction_method      none
_refine_ls_goodness_of_fit_ref    1.058
_refine_ls_hydrogen_treatment     mixed
_refine_ls_matrix_type            full
_refine_ls_number_parameters      586
_refine_ls_number_reflns          7897
_refine_ls_number_restraints      40
_refine_ls_R_factor_all           0.0727
_refine_ls_R_factor_gt            0.0596
_refine_ls_restrained_S_all       1.215
_refine_ls_shift/su_max           0.005
_refine_ls_shift/su_mean          0.001
_refine_ls_structure_factor_coef  Fsqd
_refine_ls_weighting_details
'w=1/[\s^2^(Fo^2^)+(0.0905P)^2^+9.8145P] where P=(Fo^2^+2Fc^2^)/3'
_refine_ls_weighting_scheme       calc
_refine_ls_wR_factor_gt           0.1696
_refine_ls_wR_factor_ref          0.1922
_refine_special_details           ?
_olex2_refinement_description
;
1. Others
 Fixed Sof: O15(0.3333) O16(0.3333) O14(0.3333) O15A(0.3333) O16A(0.3333)
 O17(0.5) O18(0.5) O19(0.5) N8(0.5) O20(0.5) O16B(0.3333) O14B(0.3333)
 O15B(0.3333) O14A(0.3333)
 Fixed U12: O9(0) N5(0)
 Fixed U23: O9(0) N5(0)
 Fixed Uiso: H3(0.099) H4(0.096) H7(0.12) H3A(0.09) H4A(0.094) H5(0.09)
 H7A(0.09) H8A(0.116) H8B(0.116) H10A(0.172) H10B(0.172) H10C(0.172)
 H11A(0.163) H11B(0.163) H11C(0.163) H12A(0.124) H12B(0.124) H13(0.097)
 H16(0.109) H17(0.126) H18(0.121) H22(0.127) H23(0.129) H24(0.109) H26(0.091)
 H27A(0.093) H27B(0.093) H29A(0.137) H29B(0.137) H29C(0.137) H30A(0.152)
 H30B(0.152) H30C(0.152) H31A(0.095) H31B(0.095) H32(0.083) H35(0.098) H36(0.1)
 H37(0.093) H8(0.15)
 Fixed X: H3A(0.7924) H4A(0.8479) H5(0.8195) H7A(0.7542) H8A(0.7084)
 H8B(0.6562) H10A(0.6592) H10B(0.7075) H10C(0.6589) H11A(0.6258) H11B(0.6812)
 H11C(0.6306) H12A(0.5731) H12B(0.5703) H13(0.524) H16(0.4454) H17(0.4149)
 H18(0.4594) H22(0.6883) H23(0.6959) H24(0.6706) H26(0.6319) H27A(0.5549)
 H27B(0.6086) H29A(0.6706) H29B(0.6718) H29C(0.6837) H30A(0.6158) H30B(0.5894)
 H30C(0.5563) H31A(0.5739) H31B(0.5327) H32(0.5607) H35(0.5583) H36(0.5431)
 H37(0.5499) H8(0.5798) O9(0.5) N5(0.5)
 Fixed Y: H3A(0.5708) H4A(0.6677) H5(0.8053) H7A(0.9155) H8A(1.0277)
 H8B(0.9868) H10A(1.1569) H10B(1.0963) H10C(1.0567) H11A(1.1461) H11B(1.1706)
 H11C(1.2053) H12A(1.0324) H12B(1.1013) H13(1.0348) H16(0.7405) H17(0.8866)
 H18(0.9919) H22(0.7688) H23(0.6765) H24(0.5328) H26(0.4128) H27A(0.3096)
 H27B(0.2894) H29A(0.2951) H29B(0.1911) H29C(0.2432) H30A(0.1324) H30B(0.1064)
 H30C(0.1529) H31A(0.2039) H31B(0.2526) H32(0.2761) H35(0.5745) H36(0.4271)
 H37(0.3205) H8(0.6858)
 Fixed Z: H3A(0.6248) H4A(0.5877) H5(0.5542) H7A(0.5339) H8A(0.5062)
 H8B(0.4704) H10A(0.6075) H10B(0.6041) H10C(0.6259) H11A(0.4556) H11B(0.4933)
 H11C(0.5131) H12A(0.4901) H12B(0.5408) H13(0.5917) H16(0.6969) H17(0.6859)
 H18(0.6462) H22(0.8466) H23(0.9287) H24(0.9169) H26(0.8566) H27A(0.7797)
 H27B(0.8225) H29A(0.7152) H29B(0.7153) H29C(0.7761) H30A(0.7951) H30B(0.7292)
 H30C(0.7707) H31A(0.6508) H31B(0.6808) H32(0.5729) H35(0.427) H36(0.4002)
 H37(0.4712) H8(0.5089) O9(0.75) N5(0.75)
;
_atom_sites_solution_hydrogens    mixed
_atom_sites_solution_primary      direct
_atom_sites_solution_secondary    ?
loop_
  _atom_site_label
  _atom_site_type_symbol
  _atom_site_fract_x
  _atom_site_fract_y
  _atom_site_fract_z
  _atom_site_U_iso_or_equiv
  _atom_site_adp_type
  _atom_site_occupancy
  _atom_site_site_symmetry_order
  _atom_site_calc_flag
  _atom_site_refinement_flags_posn
  _atom_site_refinement_flags_adp
  _atom_site_refinement_flags_occupancy
  _atom_site_disorder_assembly
  _atom_site_disorder_group
 Tm1 Tm 0.61614(2) 0.66151(2) 0.64196(2) 0.07016(17) Uani 1 1 d D . . . .
 Cu1 Cu 0.62786(4) 0.87033(6) 0.58242(5) 0.0709(3) Uani 1 1 d . . . . .
 Cu2 Cu 0.59928(4) 0.44765(6) 0.69063(4) 0.0628(2) Uani 1 1 d D . . . .
 O1 O 0.66595(19) 0.7606(3) 0.6023(3) 0.0831(14) Uani 1 1 d . . . . .
 O2 O 0.57926(18) 0.7999(3) 0.6174(2) 0.0734(11) Uani 1 1 d . . . . .
 O3 O 0.6957(2) 0.6021(3) 0.6353(3) 0.0822(13) Uani 1 1 d D . . . .
 H3 H 0.7118(15) 0.5511(17) 0.641(4) 0.099 Uiso 1 1 d DR . . . .
 O4 O 0.5320(2) 0.6797(3) 0.6658(2) 0.0801(13) Uani 1 1 d D . . . .
 H4 H 0.5110(17) 0.6453(19) 0.679(4) 0.096 Uiso 1 1 d DR . . . .
 O5 O 0.6222(2) 0.5640(3) 0.7203(2) 0.0726(11) Uani 1 1 d . . . . .
 O6 O 0.58916(18) 0.5179(3) 0.61804(18) 0.0652(10) Uani 1 1 d . . . . .
 O7 O 0.6520(3) 0.7275(4) 0.7335(3) 0.0999(17) Uani 1 1 d D . . . .
 H7 H 0.665(4) 0.778(2) 0.7458(11) 0.120 Uiso 1 1 d DR . . . .
 O8 O 0.5833(2) 0.6389(4) 0.5382(2) 0.0819(13) Uani 1 1 d D . . . .
 N1 N 0.6851(3) 0.9205(4) 0.5468(3) 0.0786(15) Uani 1 1 d . . . . .
 N2 N 0.5802(2) 0.9746(4) 0.5723(3) 0.0789(15) Uani 1 1 d . . . . .
 N3 N 0.6105(2) 0.3993(4) 0.7730(2) 0.0679(12) Uani 1 1 d . . . . .
 N4 N 0.5783(2) 0.3369(3) 0.6457(2) 0.0642(12) Uani 1 1 d . . . . .
 C1 C 0.7141(2) 0.7402(4) 0.5963(3) 0.0659(14) Uani 1 1 d . . . . .
 C2 C 0.7308(3) 0.6539(5) 0.6148(3) 0.0717(16) Uani 1 1 d D . . . .
 C3 C 0.7808(3) 0.6272(5) 0.6119(3) 0.0752(17) Uani 1 1 d . . . . .
 H3A H 0.7924 0.5708 0.6248 0.090 Uiso 1 1 calc R . . . .
 C4 C 0.8141(3) 0.6856(5) 0.5894(3) 0.0785(18) Uani 1 1 d . . . . .
 H4A H 0.8479 0.6677 0.5877 0.094 Uiso 1 1 calc R . . . .
 C5 C 0.7972(3) 0.7682(5) 0.5701(3) 0.0751(17) Uani 1 1 d . . . . .
 H5 H 0.8195 0.8053 0.5542 0.090 Uiso 1 1 calc R . . . .
 C6 C 0.7473(3) 0.7984(5) 0.5736(3) 0.0674(15) Uani 1 1 d . . . . .
 C7 C 0.7298(3) 0.8829(5) 0.5497(3) 0.0750(17) Uani 1 1 d . . . . .
 H7A H 0.7542 0.9155 0.5339 0.090 Uiso 1 1 calc R . . . .
 C8 C 0.6749(4) 1.0030(5) 0.5102(4) 0.097(2) Uani 1 1 d . . . . .
 H8A H 0.7084 1.0277 0.5062 0.116 Uiso 1 1 calc R . . . .
 H8B H 0.6562 0.9868 0.4704 0.116 Uiso 1 1 calc R . . . .
 C9 C 0.6448(3) 1.0733(5) 0.5336(4) 0.0791(18) Uani 1 1 d . . . . .
 C10 C 0.6700(4) 1.0982(7) 0.5990(5) 0.115(3) Uani 1 1 d . . . . .
 H10A H 0.6592 1.1569 0.6075 0.172 Uiso 1 1 calc GR . . . .
 H10B H 0.7075 1.0963 0.6041 0.172 Uiso 1 1 calc GR . . . .
 H10C H 0.6589 1.0567 0.6259 0.172 Uiso 1 1 calc GR . . . .
 C11 C 0.6457(4) 1.1566(5) 0.4953(5) 0.109(3) Uani 1 1 d . . . . .
 H11A H 0.6258 1.1461 0.4556 0.163 Uiso 1 1 calc GR . . . .
 H11B H 0.6812 1.1706 0.4933 0.163 Uiso 1 1 calc GR . . . .
 H11C H 0.6306 1.2053 0.5131 0.163 Uiso 1 1 calc GR . . . .
 C12 C 0.5887(4) 1.0492(6) 0.5310(5) 0.103(3) Uani 1 1 d . . . . .
 H12A H 0.5731 1.0324 0.4901 0.124 Uiso 1 1 calc R . . . .
 H12B H 0.5703 1.1013 0.5408 0.124 Uiso 1 1 calc R . . . .
 C13 C 0.5405(3) 0.9798(5) 0.5953(4) 0.0807(18) Uani 1 1 d . . . . .
 H13 H 0.5240 1.0348 0.5917 0.097 Uiso 1 1 calc R . . . .
 C14 C 0.5360(2) 0.8254(4) 0.6340(3) 0.0644(14) Uani 1 1 d . . . . .
 C15 C 0.5092(3) 0.7625(4) 0.6607(3) 0.0696(15) Uani 1 1 d D . . . .
 C16 C 0.4636(3) 0.7835(6) 0.6799(4) 0.091(2) Uani 1 1 d . . . . .
 H16 H 0.4454 0.7405 0.6969 0.109 Uiso 1 1 calc R . . . .
 C17 C 0.4455(3) 0.8712(7) 0.6732(5) 0.105(3) Uani 1 1 d . . . . .
 H17 H 0.4149 0.8866 0.6859 0.126 Uiso 1 1 calc R . . . .
 C18 C 0.4716(3) 0.9337(7) 0.6486(4) 0.101(3) Uani 1 1 d . . . . .
 H18 H 0.4594 0.9919 0.6462 0.121 Uiso 1 1 calc R . . . .
 C19 C 0.5168(3) 0.9133(5) 0.6264(3) 0.0754(16) Uani 1 1 d . . . . .
 C20 C 0.6425(3) 0.5891(5) 0.7764(3) 0.0698(15) Uani 1 1 d . . . . .
 C21 C 0.6587(3) 0.6770(5) 0.7850(4) 0.086(2) Uani 1 1 d D . . . .
 C22 C 0.6781(3) 0.7097(7) 0.8415(5) 0.106(3) Uani 1 1 d . . . . .
 H22 H 0.6883 0.7688 0.8466 0.127 Uiso 1 1 calc R . . . .
 C23 C 0.6825(4) 0.6546(8) 0.8905(5) 0.107(3) Uani 1 1 d . . . . .
 H23 H 0.6959 0.6765 0.9287 0.129 Uiso 1 1 calc R . . . .
 C24 C 0.6674(3) 0.5694(6) 0.8834(4) 0.091(2) Uani 1 1 d . . . . .
 H24 H 0.6706 0.5328 0.9169 0.109 Uiso 1 1 calc R . . . .
 C25 C 0.6469(3) 0.5345(5) 0.8258(3) 0.0735(17) Uani 1 1 d . . . . .
 C26 C 0.6293(3) 0.4434(5) 0.8206(3) 0.0757(17) Uani 1 1 d . . . . .
 H26 H 0.6319 0.4128 0.8566 0.091 Uiso 1 1 calc R . . . .
 C27 C 0.5925(3) 0.3083(5) 0.7823(3) 0.0772(17) Uani 1 1 d . . . . .
 H27A H 0.5549 0.3096 0.7797 0.093 Uiso 1 1 calc R . . . .
 H27B H 0.6086 0.2894 0.8225 0.093 Uiso 1 1 calc R . . . .
 C28 C 0.6048(3) 0.2407(5) 0.7383(3) 0.083(2) Uani 1 1 d . . . . .
 C29 C 0.6631(3) 0.2427(6) 0.7360(4) 0.091(2) Uani 1 1 d . . . . .
 H29A H 0.6706 0.2951 0.7152 0.137 Uiso 1 1 calc GR . . . .
 H29B H 0.6718 0.1911 0.7153 0.137 Uiso 1 1 calc GR . . . .
 H29C H 0.6837 0.2432 0.7761 0.137 Uiso 1 1 calc GR . . . .
 C30 C 0.5902(4) 0.1496(6) 0.7604(4) 0.101(3) Uani 1 1 d . . . . .
 H30A H 0.6158 0.1324 0.7951 0.152 Uiso 1 1 calc GR . . . .
 H30B H 0.5894 0.1064 0.7292 0.152 Uiso 1 1 calc GR . . . .
 H30C H 0.5563 0.1529 0.7707 0.152 Uiso 1 1 calc GR . . . .
 C31 C 0.5689(3) 0.2536(5) 0.6762(3) 0.0788(17) Uani 1 1 d . . . . .
 H31A H 0.5739 0.2039 0.6508 0.095 Uiso 1 1 calc R . . . .
 H31B H 0.5327 0.2526 0.6808 0.095 Uiso 1 1 calc R . . . .
 C32 C 0.5687(3) 0.3326(4) 0.5888(3) 0.0688(15) Uani 1 1 d . . . . .
 H32 H 0.5607 0.2761 0.5729 0.083 Uiso 1 1 calc R . . . .
 C33 C 0.5774(2) 0.4898(4) 0.5616(3) 0.0631(13) Uani 1 1 d . . . . .
 C34 C 0.5737(3) 0.5542(4) 0.5163(3) 0.0672(14) Uani 1 1 d . . . . .
 C35 C 0.5609(3) 0.5311(6) 0.4565(3) 0.081(2) Uani 1 1 d . . . . .
 H35 H 0.5583 0.5745 0.4270 0.098 Uiso 1 1 calc R . . . .
 C36 C 0.5518(3) 0.4427(6) 0.4405(3) 0.083(2) Uani 1 1 d . . . . .
 H36 H 0.5431 0.4271 0.4002 0.100 Uiso 1 1 calc R . . . .
 C37 C 0.5556(3) 0.3796(5) 0.4827(3) 0.0773(17) Uani 1 1 d . . . . .
 H37 H 0.5499 0.3205 0.4712 0.093 Uiso 1 1 calc R . . . .
 C38 C 0.5681(2) 0.4016(4) 0.5453(3) 0.0643(14) Uani 1 1 d . . . . .
 N7 N 0.5533(3) 0.8064(5) 0.4401(3) 0.0906(16) Uiso 1 1 d D . . . .
 O15 O 0.5551(8) 0.8718(13) 0.4100(10) 0.097(5) Uiso 0.3333 1 d D . . A 1
 O16 O 0.5138(7) 0.8168(11) 0.4726(7) 0.080(4) Uiso 0.3333 1 d D . . A 1
 O14 O 0.5794(7) 0.7377(9) 0.4471(8) 0.084(4) Uiso 0.3333 1 d D . . A 1
 O15A O 0.5431(8) 0.8403(13) 0.3899(6) 0.0906(16) Uiso 0.3333 1 d D . . A 3
 O16A O 0.5398(12) 0.8359(17) 0.4829(8) 0.137(9) Uiso 0.3333 1 d D . . A 3
 O17 O 0.6635(6) 0.9060(11) 0.6935(7) 0.121(4) Uiso 0.5 1 d D . . B 1
 O18 O 0.7071(15) 0.997(2) 0.7546(19) 0.14(3) Uiso 0.5 1 d D . . B 1
 O19 O 0.7486(17) 0.886(2) 0.713(2) 0.14(6) Uiso 0.5 1 d D . . B 1
 N8 N 0.7087(6) 0.9251(15) 0.7174(9) 0.140(7) Uiso 0.5 1 d D . . B 1
 O11 O 0.7095(7) 0.4346(11) 0.6420(6) 0.249(5) Uiso 1 1 d D . . . .
 O12 O 0.7178(7) 0.3320(10) 0.5807(7) 0.249(5) Uiso 1 1 d D . . . .
 O13 O 0.7052(7) 0.4562(11) 0.5438(7) 0.263(8) Uiso 1 1 d D . . . .
 N6 N 0.7139(9) 0.4117(10) 0.5912(7) 0.249(5) Uiso 1 1 d D . . . .
 O20 O 0.7077(7) 0.8729(12) 0.7646(7) 0.125(5) Uiso 0.5 1 d . . . C 2
 H8 H 0.5798 0.6858 0.5089 0.150 Uiso 1 1 d DG . . . .
 O9 O 0.5000 0.5900(5) 0.7500 0.093(2) Uani 1 2 d S T P . .
 O10 O 0.50335(19) 0.4664(3) 0.7042(2) 0.0763(12) Uani 1 1 d D . . . .
 N5 N 0.5000 0.5056(5) 0.7500 0.0642(16) Uani 1 2 d S T P . .
 O16B O 0.5913(5) 0.7845(10) 0.4805(6) 0.078(3) Uiso 0.3333 1 d D . . A 2
 O14B O 0.515(2) 0.758(3) 0.425(4) 0.11(7) Uiso 0.3333 1 d D . . A 2
 O15B O 0.548(2) 0.8848(14) 0.425(3) 0.11(4) Uiso 0.3333 1 d D . . A 2
 O14A O 0.5589(9) 0.7270(14) 0.4229(10) 0.101(5) Uiso 0.3333 1 d . . . A 3

loop_
  _atom_site_aniso_label
  _atom_site_aniso_U_11
  _atom_site_aniso_U_22
  _atom_site_aniso_U_33
  _atom_site_aniso_U_23
  _atom_site_aniso_U_13
  _atom_site_aniso_U_12
 Tm1 0.0823(3) 0.0566(2) 0.0814(3) -0.00133(14) 0.03973(19) -0.00168(15)
 Cu1 0.0740(6) 0.0556(5) 0.0929(6) 0.0017(4) 0.0398(5) 0.0003(4)
 Cu2 0.0749(5) 0.0555(4) 0.0604(5) -0.0012(3) 0.0195(4) 0.0013(4)
 O1 0.074(3) 0.065(3) 0.125(4) 0.011(3) 0.053(3) 0.005(2)
 O2 0.075(3) 0.056(2) 0.101(3) 0.004(2) 0.047(2) 0.005(2)
 O3 0.079(3) 0.065(3) 0.113(4) 0.010(2) 0.043(3) 0.015(2)
 O4 0.091(3) 0.068(3) 0.095(3) 0.006(2) 0.052(3) -0.003(2)
 O5 0.088(3) 0.065(2) 0.067(2) -0.0071(19) 0.022(2) -0.004(2)
 O6 0.083(3) 0.056(2) 0.061(2) -0.0016(17) 0.0238(19) -0.0030(19)
 O7 0.109(4) 0.068(3) 0.133(5) -0.025(3) 0.047(4) -0.020(3)
 O8 0.099(3) 0.075(3) 0.081(3) 0.016(2) 0.037(3) 0.007(3)
 N1 0.093(4) 0.059(3) 0.097(4) -0.005(3) 0.052(3) -0.007(3)
 N2 0.072(3) 0.063(3) 0.108(4) 0.007(3) 0.033(3) 0.002(3)
 N3 0.073(3) 0.071(3) 0.061(3) 0.002(2) 0.016(2) 0.000(2)
 N4 0.068(3) 0.058(3) 0.065(3) 0.002(2) 0.011(2) 0.004(2)
 C1 0.067(3) 0.065(3) 0.072(3) -0.007(3) 0.029(3) 0.003(3)
 C2 0.066(4) 0.076(4) 0.078(4) -0.014(3) 0.025(3) 0.000(3)
 C3 0.066(4) 0.079(4) 0.084(4) -0.010(3) 0.024(3) 0.011(3)
 C4 0.063(4) 0.091(5) 0.086(4) -0.014(4) 0.025(3) 0.010(3)
 C5 0.063(3) 0.092(5) 0.075(4) -0.020(3) 0.026(3) -0.015(3)
 C6 0.070(4) 0.072(4) 0.064(3) -0.018(3) 0.023(3) -0.005(3)
 C7 0.081(4) 0.069(4) 0.087(4) -0.015(3) 0.044(3) -0.010(3)
 C8 0.123(7) 0.071(4) 0.112(6) 0.012(4) 0.062(5) 0.001(4)
 C9 0.086(4) 0.058(3) 0.104(5) 0.001(3) 0.044(4) -0.006(3)
 C10 0.123(7) 0.089(6) 0.142(8) -0.023(6) 0.049(6) -0.015(5)
 C11 0.120(7) 0.068(4) 0.154(9) 0.027(5) 0.065(7) 0.010(4)
 C12 0.098(6) 0.072(5) 0.147(8) 0.026(5) 0.045(6) 0.013(4)
 C13 0.072(4) 0.065(4) 0.111(5) 0.003(4) 0.030(4) 0.006(3)
 C14 0.061(3) 0.066(3) 0.071(3) -0.006(3) 0.024(3) -0.001(3)
 C15 0.071(4) 0.067(3) 0.077(4) 0.000(3) 0.028(3) -0.003(3)
 C16 0.068(4) 0.096(5) 0.120(6) 0.019(5) 0.044(4) 0.006(4)
 C17 0.073(4) 0.114(7) 0.144(8) 0.032(6) 0.056(5) 0.029(5)
 C18 0.082(5) 0.103(6) 0.131(7) 0.025(5) 0.053(5) 0.031(4)
 C19 0.072(4) 0.076(4) 0.084(4) 0.001(3) 0.028(3) 0.008(3)
 C20 0.065(3) 0.072(4) 0.077(4) -0.016(3) 0.023(3) 0.002(3)
 C21 0.080(4) 0.073(4) 0.113(6) -0.027(4) 0.036(4) -0.003(3)
 C22 0.079(5) 0.099(6) 0.135(8) -0.052(6) 0.009(5) -0.008(4)
 C23 0.088(6) 0.130(8) 0.096(6) -0.041(6) 0.001(5) 0.018(5)
 C24 0.088(5) 0.101(6) 0.080(4) -0.028(4) 0.006(4) 0.018(4)
 C25 0.064(3) 0.085(4) 0.073(4) -0.013(3) 0.015(3) 0.014(3)
 C26 0.078(4) 0.083(4) 0.069(4) 0.004(3) 0.022(3) 0.014(3)
 C27 0.089(5) 0.071(4) 0.074(4) 0.013(3) 0.021(3) 0.008(3)
 C28 0.111(6) 0.060(4) 0.074(4) 0.011(3) 0.009(4) 0.001(4)
 C29 0.093(5) 0.083(5) 0.097(5) 0.003(4) 0.018(4) 0.018(4)
 C30 0.133(8) 0.071(4) 0.096(6) 0.019(4) 0.016(5) -0.003(5)
 C31 0.091(5) 0.066(4) 0.077(4) 0.003(3) 0.012(3) -0.007(3)
 C32 0.070(4) 0.064(3) 0.072(4) -0.006(3) 0.014(3) 0.010(3)
 C33 0.059(3) 0.067(3) 0.066(3) -0.003(3) 0.021(3) 0.008(3)
 C34 0.068(3) 0.066(3) 0.072(4) 0.006(3) 0.026(3) 0.013(3)
 C35 0.078(4) 0.100(5) 0.071(4) 0.022(4) 0.028(3) 0.018(4)
 C36 0.090(5) 0.103(6) 0.056(3) -0.003(3) 0.011(3) 0.013(4)
 C37 0.078(4) 0.087(5) 0.066(4) -0.014(3) 0.013(3) 0.009(3)
 C38 0.055(3) 0.073(4) 0.065(3) -0.003(3) 0.011(2) 0.010(3)
 O9 0.133(6) 0.065(4) 0.102(5) 0.000 0.076(5) 0.000
 O10 0.082(3) 0.080(3) 0.069(3) -0.006(2) 0.021(2) 0.002(2)
 N5 0.066(4) 0.067(4) 0.066(4) 0.000 0.029(3) 0.000

_geom_special_details
;
 All esds (except the esd in the dihedral angle between two l.s. planes)
 are estimated using the full covariance matrix.  The cell esds are taken
 into account individually in the estimation of esds in distances, angles
 and torsion angles; correlations between esds in cell parameters are only
 used when they are defined by crystal symmetry.  An approximate (isotropic)
 treatment of cell esds is used for estimating esds involving l.s. planes.
;
loop_
  _geom_bond_atom_site_label_1
  _geom_bond_atom_site_label_2
  _geom_bond_distance
  _geom_bond_site_symmetry_2
  _geom_bond_publ_flag
 Tm1 Cu1 3.4631(10) . ?
 Tm1 Cu2 3.4636(9) . ?
 Tm1 O1 2.280(5) . ?
 Tm1 O2 2.317(4) . ?
 Tm1 O3 2.289(5) . ?
 Tm1 O4 2.377(5) . ?
 Tm1 O5 2.291(5) . ?
 Tm1 O6 2.306(4) . ?
 Tm1 O7 2.326(6) . ?
 Tm1 O8 2.368(5) . ?
 Cu1 O1 1.934(5) . ?
 Cu1 O2 1.941(4) . ?
 Cu1 N1 1.983(5) . ?
 Cu1 N2 1.987(6) . ?
 Cu2 O5 1.930(5) . ?
 Cu2 O6 1.935(4) . ?
 Cu2 N3 1.977(5) . ?
 Cu2 N4 1.975(5) . ?
 O1 C1 1.324(8) . ?
 O2 C14 1.315(7) . ?
 O3 H3 0.873(9) . ?
 O3 C2 1.354(9) . ?
 O4 H4 0.858(9) . ?
 O4 C15 1.376(9) . ?
 O5 C20 1.334(8) . ?
 O6 C33 1.328(7) . ?
 O7 H7 0.868(9) . ?
 O7 C21 1.378(11) . ?
 O8 C34 1.375(9) . ?
 O8 H8 0.9631 . ?
 N1 C7 1.285(10) . ?
 N1 C8 1.490(10) . ?
 N2 C12 1.509(10) . ?
 N2 C13 1.250(9) . ?
 N3 C26 1.282(9) . ?
 N3 C27 1.477(9) . ?
 N4 C31 1.479(9) . ?
 N4 C32 1.271(8) . ?
 C1 C2 1.409(10) . ?
 C1 C6 1.402(9) . ?
 C2 C3 1.377(9) . ?
 C3 H3A 0.9300 . ?
 C3 C4 1.403(11) . ?
 C4 H4A 0.9300 . ?
 C4 C5 1.363(11) . ?
 C5 H5 0.9300 . ?
 C5 C6 1.395(9) . ?
 C6 C7 1.422(11) . ?
 C7 H7A 0.9300 . ?
 C8 H8A 0.9700 . ?
 C8 H8B 0.9700 . ?
 C8 C9 1.480(11) . ?
 C9 C10 1.546(13) . ?
 C9 C11 1.530(10) . ?
 C9 C12 1.494(12) . ?
 C10 H10A 0.9600 . ?
 C10 H10B 0.9600 . ?
 C10 H10C 0.9600 . ?
 C11 H11A 0.9600 . ?
 C11 H11B 0.9600 . ?
 C11 H11C 0.9600 . ?
 C12 H12A 0.9700 . ?
 C12 H12B 0.9700 . ?
 C13 H13 0.9300 . ?
 C13 C19 1.438(10) . ?
 C14 C15 1.389(9) . ?
 C14 C19 1.413(10) . ?
 C15 C16 1.383(10) . ?
 C16 H16 0.9300 . ?
 C16 C17 1.401(13) . ?
 C17 H17 0.9300 . ?
 C17 C18 1.350(13) . ?
 C18 H18 0.9300 . ?
 C18 C19 1.404(10) . ?
 C20 C21 1.393(10) . ?
 C20 C25 1.378(10) . ?
 C21 C22 1.374(12) . ?
 C22 H22 0.9300 . ?
 C22 C23 1.376(15) . ?
 C23 H23 0.9300 . ?
 C23 C24 1.342(14) . ?
 C24 H24 0.9300 . ?
 C24 C25 1.414(10) . ?
 C25 C26 1.444(11) . ?
 C26 H26 0.9300 . ?
 C27 H27A 0.9700 . ?
 C27 H27B 0.9700 . ?
 C27 C28 1.507(11) . ?
 C28 C29 1.532(12) . ?
 C28 C30 1.536(10) . ?
 C28 C31 1.541(10) . ?
 C29 H29A 0.9600 . ?
 C29 H29B 0.9600 . ?
 C29 H29C 0.9600 . ?
 C30 H30A 0.9600 . ?
 C30 H30B 0.9600 . ?
 C30 H30C 0.9600 . ?
 C31 H31A 0.9700 . ?
 C31 H31B 0.9700 . ?
 C32 H32 0.9300 . ?
 C32 C38 1.433(9) . ?
 C33 C34 1.404(9) . ?
 C33 C38 1.387(9) . ?
 C34 C35 1.381(10) . ?
 C35 H35 0.9300 . ?
 C35 C36 1.388(12) . ?
 C36 H36 0.9300 . ?
 C36 C37 1.341(11) . ?
 C37 H37 0.9300 . ?
 C37 C38 1.435(9) . ?
 N7 O15 1.206(14) . ?
 N7 O16 1.392(17) . ?
 N7 O14 1.230(9) . ?
 N7 O15A 1.230(9) . ?
 N7 O16A 1.187(9) . ?
 N7 O16B 1.251(8) . ?
 N7 O14B 1.221(16) . ?
 N7 O15B 1.226(10) . ?
 N7 O14A 1.28(2) . ?
 O17 N8 1.228(10) . ?
 O18 N8 1.380(9) . ?
 O19 N8 1.216(10) . ?
 O11 N6 1.234(9) . ?
 O12 N6 1.232(9) . ?
 O13 N6 1.251(9) . ?
 O9 N5 1.273(10) . ?
 O10 N5 1.216(6) . ?
 N5 O10 1.216(6) 2_656 ?

loop_
  _geom_angle_atom_site_label_1
  _geom_angle_atom_site_label_2
  _geom_angle_atom_site_label_3
  _geom_angle
  _geom_angle_site_symmetry_1
  _geom_angle_site_symmetry_3
  _geom_angle_publ_flag
 Cu1 Tm1 Cu2 175.58(3) . . ?
 O1 Tm1 Cu1 31.60(12) . . ?
 O1 Tm1 Cu2 148.71(12) . . ?
 O1 Tm1 O2 63.68(16) . . ?
 O1 Tm1 O3 68.58(17) . . ?
 O1 Tm1 O4 129.74(16) . . ?
 O1 Tm1 O5 140.59(19) . . ?
 O1 Tm1 O6 133.73(17) . . ?
 O1 Tm1 O7 85.3(2) . . ?
 O1 Tm1 O8 79.6(2) . . ?
 O2 Tm1 Cu1 32.11(10) . . ?
 O2 Tm1 Cu2 147.28(11) . . ?
 O2 Tm1 O4 66.10(16) . . ?
 O2 Tm1 O7 84.4(2) . . ?
 O2 Tm1 O8 80.80(18) . . ?
 O3 Tm1 Cu1 100.17(12) . . ?
 O3 Tm1 Cu2 80.36(12) . . ?
 O3 Tm1 O2 132.26(16) . . ?
 O3 Tm1 O4 161.48(17) . . ?
 O3 Tm1 O5 83.11(18) . . ?
 O3 Tm1 O6 81.62(18) . . ?
 O3 Tm1 O7 91.2(2) . . ?
 O3 Tm1 O8 91.6(2) . . ?
 O4 Tm1 Cu1 98.21(12) . . ?
 O4 Tm1 Cu2 81.49(12) . . ?
 O5 Tm1 Cu1 152.77(11) . . ?
 O5 Tm1 Cu2 31.58(11) . . ?
 O5 Tm1 O2 136.44(16) . . ?
 O5 Tm1 O4 79.49(18) . . ?
 O5 Tm1 O6 63.40(15) . . ?
 O5 Tm1 O7 67.95(19) . . ?
 O5 Tm1 O8 129.68(17) . . ?
 O6 Tm1 Cu1 143.78(10) . . ?
 O6 Tm1 Cu2 31.83(10) . . ?
 O6 Tm1 O2 134.11(18) . . ?
 O6 Tm1 O4 84.92(17) . . ?
 O6 Tm1 O7 131.32(19) . . ?
 O6 Tm1 O8 66.32(16) . . ?
 O7 Tm1 Cu1 84.90(16) . . ?
 O7 Tm1 Cu2 99.49(16) . . ?
 O7 Tm1 O4 88.1(2) . . ?
 O7 Tm1 O8 162.4(2) . . ?
 O8 Tm1 Cu1 77.46(13) . . ?
 O8 Tm1 Cu2 98.15(13) . . ?
 O8 Tm1 O4 94.62(19) . . ?
 O1 Cu1 Tm1 38.15(13) . . ?
 O1 Cu1 O2 77.48(19) . . ?
 O1 Cu1 N1 91.7(2) . . ?
 O1 Cu1 N2 169.1(2) . . ?
 O2 Cu1 Tm1 39.37(13) . . ?
 O2 Cu1 N1 168.9(2) . . ?
 O2 Cu1 N2 92.0(2) . . ?
 N1 Cu1 Tm1 129.69(18) . . ?
 N1 Cu1 N2 98.9(2) . . ?
 N2 Cu1 Tm1 131.39(17) . . ?
 O5 Cu2 Tm1 38.43(13) . . ?
 O5 Cu2 O6 77.36(18) . . ?
 O5 Cu2 N3 91.5(2) . . ?
 O5 Cu2 N4 169.2(2) . . ?
 O6 Cu2 Tm1 38.94(12) . . ?
 O6 Cu2 N3 168.5(2) . . ?
 O6 Cu2 N4 92.5(2) . . ?
 N3 Cu2 Tm1 129.95(17) . . ?
 N4 Cu2 Tm1 131.27(15) . . ?
 N4 Cu2 N3 98.7(2) . . ?
 Cu1 O1 Tm1 110.3(2) . . ?
 C1 O1 Tm1 121.0(4) . . ?
 C1 O1 Cu1 128.7(4) . . ?
 Cu1 O2 Tm1 108.53(19) . . ?
 C14 O2 Tm1 122.1(4) . . ?
 C14 O2 Cu1 128.7(4) . . ?
 Tm1 O3 H3 138.2(16) . . ?
 C2 O3 Tm1 118.7(4) . . ?
 C2 O3 H3 103.0(16) . . ?
 Tm1 O4 H4 134.4(16) . . ?
 C15 O4 Tm1 119.2(4) . . ?
 C15 O4 H4 106.3(16) . . ?
 Cu2 O5 Tm1 110.0(2) . . ?
 C20 O5 Tm1 121.0(4) . . ?
 C20 O5 Cu2 128.8(4) . . ?
 Cu2 O6 Tm1 109.22(18) . . ?
 C33 O6 Tm1 121.8(4) . . ?
 C33 O6 Cu2 128.0(4) . . ?
 Tm1 O7 H7 137.0(17) . . ?
 C21 O7 Tm1 119.0(4) . . ?
 C21 O7 H7 103.8(17) . . ?
 Tm1 O8 H8 123.4 . . ?
 C34 O8 Tm1 119.8(4) . . ?
 C34 O8 H8 116.4 . . ?
 C7 N1 Cu1 124.0(5) . . ?
 C7 N1 C8 116.9(6) . . ?
 C8 N1 Cu1 118.9(5) . . ?
 C12 N2 Cu1 119.5(5) . . ?
 C13 N2 Cu1 123.4(5) . . ?
 C13 N2 C12 116.9(7) . . ?
 C26 N3 Cu2 124.7(5) . . ?
 C26 N3 C27 115.9(6) . . ?
 C27 N3 Cu2 119.2(4) . . ?
 C31 N4 Cu2 121.9(4) . . ?
 C32 N4 Cu2 123.3(4) . . ?
 C32 N4 C31 114.6(6) . . ?
 O1 C1 C2 115.1(6) . . ?
 O1 C1 C6 124.1(6) . . ?
 C6 C1 C2 120.8(6) . . ?
 O3 C2 C1 116.5(6) . . ?
 O3 C2 C3 124.0(7) . . ?
 C3 C2 C1 119.5(7) . . ?
 C2 C3 H3A 120.2 . . ?
 C2 C3 C4 119.7(7) . . ?
 C4 C3 H3A 120.1 . . ?
 C3 C4 H4A 119.8 . . ?
 C5 C4 C3 120.5(6) . . ?
 C5 C4 H4A 119.7 . . ?
 C4 C5 H5 119.2 . . ?
 C4 C5 C6 121.5(7) . . ?
 C6 C5 H5 119.3 . . ?
 C1 C6 C7 121.9(6) . . ?
 C5 C6 C1 117.9(7) . . ?
 C5 C6 C7 120.0(6) . . ?
 N1 C7 C6 129.1(6) . . ?
 N1 C7 H7A 115.5 . . ?
 C6 C7 H7A 115.5 . . ?
 N1 C8 H8A 108.2 . . ?
 N1 C8 H8B 108.2 . . ?
 H8A C8 H8B 107.3 . . ?
 C9 C8 N1 116.4(6) . . ?
 C9 C8 H8A 108.2 . . ?
 C9 C8 H8B 108.2 . . ?
 C8 C9 C10 111.4(8) . . ?
 C8 C9 C11 108.3(6) . . ?
 C8 C9 C12 113.4(7) . . ?
 C11 C9 C10 107.2(8) . . ?
 C12 C9 C10 108.6(7) . . ?
 C12 C9 C11 107.7(7) . . ?
 C9 C10 H10A 109.5 . . ?
 C9 C10 H10B 109.5 . . ?
 C9 C10 H10C 109.5 . . ?
 H10A C10 H10B 109.5 . . ?
 H10A C10 H10C 109.5 . . ?
 H10B C10 H10C 109.5 . . ?
 C9 C11 H11A 109.6 . . ?
 C9 C11 H11B 109.4 . . ?
 C9 C11 H11C 109.4 . . ?
 H11A C11 H11B 109.5 . . ?
 H11A C11 H11C 109.5 . . ?
 H11B C11 H11C 109.5 . . ?
 N2 C12 H12A 108.6 . . ?
 N2 C12 H12B 108.5 . . ?
 C9 C12 N2 115.0(7) . . ?
 C9 C12 H12A 108.5 . . ?
 C9 C12 H12B 108.5 . . ?
 H12A C12 H12B 107.5 . . ?
 N2 C13 H13 115.2 . . ?
 N2 C13 C19 129.5(7) . . ?
 C19 C13 H13 115.3 . . ?
 O2 C14 C15 117.5(6) . . ?
 O2 C14 C19 122.8(6) . . ?
 C15 C14 C19 119.7(6) . . ?
 O4 C15 C14 114.1(6) . . ?
 O4 C15 C16 124.4(6) . . ?
 C16 C15 C14 121.5(7) . . ?
 C15 C16 H16 120.9 . . ?
 C15 C16 C17 118.2(7) . . ?
 C17 C16 H16 120.9 . . ?
 C16 C17 H17 119.4 . . ?
 C18 C17 C16 121.1(7) . . ?
 C18 C17 H17 119.4 . . ?
 C17 C18 H18 119.1 . . ?
 C17 C18 C19 121.7(8) . . ?
 C19 C18 H18 119.1 . . ?
 C14 C19 C13 122.4(6) . . ?
 C18 C19 C13 119.9(7) . . ?
 C18 C19 C14 117.6(7) . . ?
 O5 C20 C21 116.9(7) . . ?
 O5 C20 C25 124.2(6) . . ?
 C25 C20 C21 118.8(7) . . ?
 O7 C21 C20 115.0(7) . . ?
 C22 C21 O7 124.0(8) . . ?
 C22 C21 C20 121.0(9) . . ?
 C21 C22 H22 120.0 . . ?
 C21 C22 C23 119.8(9) . . ?
 C23 C22 H22 120.2 . . ?
 C22 C23 H23 119.8 . . ?
 C24 C23 C22 120.3(8) . . ?
 C24 C23 H23 119.9 . . ?
 C23 C24 H24 119.5 . . ?
 C23 C24 C25 120.9(9) . . ?
 C25 C24 H24 119.6 . . ?
 C20 C25 C24 119.1(8) . . ?
 C20 C25 C26 121.9(6) . . ?
 C24 C25 C26 118.9(7) . . ?
 N3 C26 C25 128.4(7) . . ?
 N3 C26 H26 115.8 . . ?
 C25 C26 H26 115.8 . . ?
 N3 C27 H27A 108.6 . . ?
 N3 C27 H27B 108.6 . . ?
 N3 C27 C28 114.6(6) . . ?
 H27A C27 H27B 107.6 . . ?
 C28 C27 H27A 108.6 . . ?
 C28 C27 H27B 108.6 . . ?
 C27 C28 C29 110.7(7) . . ?
 C27 C28 C30 106.7(7) . . ?
 C27 C28 C31 110.7(6) . . ?
 C29 C28 C30 110.0(7) . . ?
 C29 C28 C31 112.8(7) . . ?
 C30 C28 C31 105.6(7) . . ?
 C28 C29 H29A 109.5 . . ?
 C28 C29 H29B 109.5 . . ?
 C28 C29 H29C 109.4 . . ?
 H29A C29 H29B 109.5 . . ?
 H29A C29 H29C 109.5 . . ?
 H29B C29 H29C 109.5 . . ?
 C28 C30 H30A 109.4 . . ?
 C28 C30 H30B 109.5 . . ?
 C28 C30 H30C 109.5 . . ?
 H30A C30 H30B 109.5 . . ?
 H30A C30 H30C 109.5 . . ?
 H30B C30 H30C 109.5 . . ?
 N4 C31 C28 114.2(6) . . ?
 N4 C31 H31A 108.7 . . ?
 N4 C31 H31B 108.7 . . ?
 C28 C31 H31A 108.7 . . ?
 C28 C31 H31B 108.7 . . ?
 H31A C31 H31B 107.6 . . ?
 N4 C32 H32 115.2 . . ?
 N4 C32 C38 129.6(6) . . ?
 C38 C32 H32 115.2 . . ?
 O6 C33 C34 117.2(6) . . ?
 O6 C33 C38 123.9(6) . . ?
 C38 C33 C34 118.9(6) . . ?
 O8 C34 C33 113.3(6) . . ?
 O8 C34 C35 125.5(6) . . ?
 C35 C34 C33 121.2(7) . . ?
 C34 C35 H35 120.1 . . ?
 C34 C35 C36 119.7(7) . . ?
 C36 C35 H35 120.2 . . ?
 C35 C36 H36 119.7 . . ?
 C37 C36 C35 120.6(7) . . ?
 C37 C36 H36 119.7 . . ?
 C36 C37 H37 119.5 . . ?
 C36 C37 C38 121.1(7) . . ?
 C38 C37 H37 119.4 . . ?
 C32 C38 C37 119.1(6) . . ?
 C33 C38 C32 122.3(6) . . ?
 C33 C38 C37 118.6(6) . . ?
 O15 N7 O16 109.1(13) . . ?
 O15 N7 O14 132.6(15) . . ?
 O14 N7 O16 118.2(12) . . ?
 O15A N7 O14A 97.0(14) . . ?
 O16A N7 O15A 124.2(16) . . ?
 O16A N7 O14A 132.3(18) . . ?
 O16B N7 O15B 118.5(17) . . ?
 O14B N7 O16B 121.2(18) . . ?
 O14B N7 O15B 118.1(18) . . ?
 O17 N8 O18 108.1(13) . . ?
 O19 N8 O17 128(3) . . ?
 O19 N8 O18 124.8(17) . . ?
 O11 N6 O13 128.5(15) . . ?
 O12 N6 O11 118.8(14) . . ?
 O12 N6 O13 111.2(13) . . ?
 O10 N5 O9 119.1(4) 2_656 . ?
 O10 N5 O9 119.1(4) . . ?
 O10 N5 O10 121.8(8) . 2_656 ?

loop_
  _geom_torsion_atom_site_label_1
  _geom_torsion_atom_site_label_2
  _geom_torsion_atom_site_label_3
  _geom_torsion_atom_site_label_4
  _geom_torsion
  _geom_torsion_site_symmetry_1
  _geom_torsion_site_symmetry_2
  _geom_torsion_site_symmetry_3
  _geom_torsion_site_symmetry_4
  _geom_torsion_publ_flag
 Tm1 O1 C1 C2 1.2(8) . . . . ?
 Tm1 O1 C1 C6 -178.4(5) . . . . ?
 Tm1 O2 C14 C15 -7.9(8) . . . . ?
 Tm1 O2 C14 C19 171.4(5) . . . . ?
 Tm1 O3 C2 C1 -3.0(8) . . . . ?
 Tm1 O3 C2 C3 176.3(5) . . . . ?
 Tm1 O4 C15 C14 7.8(8) . . . . ?
 Tm1 O4 C15 C16 -171.9(6) . . . . ?
 Tm1 O5 C20 C21 1.2(8) . . . . ?
 Tm1 O5 C20 C25 179.3(5) . . . . ?
 Tm1 O6 C33 C34 -10.1(7) . . . . ?
 Tm1 O6 C33 C38 170.6(4) . . . . ?
 Tm1 O7 C21 C20 -0.4(9) . . . . ?
 Tm1 O7 C21 C22 -178.1(6) . . . . ?
 Tm1 O8 C34 C33 9.3(7) . . . . ?
 Tm1 O8 C34 C35 -171.4(5) . . . . ?
 Cu1 O1 C1 C2 -179.8(5) . . . . ?
 Cu1 O1 C1 C6 0.5(10) . . . . ?
 Cu1 O2 C14 C15 -177.1(5) . . . . ?
 Cu1 O2 C14 C19 2.2(10) . . . . ?
 Cu1 N1 C7 C6 4.8(11) . . . . ?
 Cu1 N1 C8 C9 41.8(11) . . . . ?
 Cu1 N2 C12 C9 -40.1(11) . . . . ?
 Cu1 N2 C13 C19 -8.1(13) . . . . ?
 Cu2 O5 C20 C21 176.2(5) . . . . ?
 Cu2 O5 C20 C25 -5.6(9) . . . . ?
 Cu2 O6 C33 C34 -178.1(4) . . . . ?
 Cu2 O6 C33 C38 2.7(9) . . . . ?
 Cu2 N3 C26 C25 -1.1(10) . . . . ?
 Cu2 N3 C27 C28 43.8(8) . . . . ?
 Cu2 N4 C31 C28 -34.4(9) . . . . ?
 Cu2 N4 C32 C38 -2.9(10) . . . . ?
 O1 C1 C2 O3 1.2(9) . . . . ?
 O1 C1 C2 C3 -178.2(6) . . . . ?
 O1 C1 C6 C5 179.6(6) . . . . ?
 O1 C1 C6 C7 -6.0(10) . . . . ?
 O2 C14 C15 O4 -0.3(9) . . . . ?
 O2 C14 C15 C16 179.5(7) . . . . ?
 O2 C14 C19 C13 5.4(12) . . . . ?
 O2 C14 C19 C18 -177.0(8) . . . . ?
 O3 C2 C3 C4 179.4(7) . . . . ?
 O4 C15 C16 C17 178.3(8) . . . . ?
 O5 C20 C21 O7 -0.5(10) . . . . ?
 O5 C20 C21 C22 177.3(7) . . . . ?
 O5 C20 C25 C24 -177.8(6) . . . . ?
 O5 C20 C25 C26 -0.2(10) . . . . ?
 O6 C33 C34 O8 0.2(8) . . . . ?
 O6 C33 C34 C35 -179.1(6) . . . . ?
 O6 C33 C38 C32 2.3(10) . . . . ?
 O6 C33 C38 C37 179.8(6) . . . . ?
 O7 C21 C22 C23 178.6(8) . . . . ?
 O8 C34 C35 C36 -179.6(7) . . . . ?
 N1 C8 C9 C10 53.9(11) . . . . ?
 N1 C8 C9 C11 171.6(8) . . . . ?
 N1 C8 C9 C12 -68.9(11) . . . . ?
 N2 C13 C19 C14 -2.1(14) . . . . ?
 N2 C13 C19 C18 -179.6(9) . . . . ?
 N3 C27 C28 C29 52.6(8) . . . . ?
 N3 C27 C28 C30 172.3(7) . . . . ?
 N3 C27 C28 C31 -73.3(8) . . . . ?
 N4 C32 C38 C33 -2.2(11) . . . . ?
 N4 C32 C38 C37 -179.6(7) . . . . ?
 C1 C2 C3 C4 -1.3(11) . . . . ?
 C1 C6 C7 N1 3.1(12) . . . . ?
 C2 C1 C6 C5 0.0(10) . . . . ?
 C2 C1 C6 C7 174.4(6) . . . . ?
 C2 C3 C4 C5 -0.4(11) . . . . ?
 C3 C4 C5 C6 1.9(11) . . . . ?
 C4 C5 C6 C1 -1.6(10) . . . . ?
 C4 C5 C6 C7 -176.2(6) . . . . ?
 C5 C6 C7 N1 177.4(7) . . . . ?
 C6 C1 C2 O3 -179.1(6) . . . . ?
 C6 C1 C2 C3 1.5(10) . . . . ?
 C7 N1 C8 C9 -143.0(8) . . . . ?
 C8 N1 C7 C6 -170.2(7) . . . . ?
 C8 C9 C12 N2 67.3(11) . . . . ?
 C10 C9 C12 N2 -57.1(10) . . . . ?
 C11 C9 C12 N2 -172.9(8) . . . . ?
 C12 N2 C13 C19 166.9(9) . . . . ?
 C13 N2 C12 C9 144.7(8) . . . . ?
 C14 C15 C16 C17 -1.4(13) . . . . ?
 C15 C14 C19 C13 -175.3(7) . . . . ?
 C15 C14 C19 C18 2.3(11) . . . . ?
 C15 C16 C17 C18 0.1(16) . . . . ?
 C16 C17 C18 C19 2.6(17) . . . . ?
 C17 C18 C19 C13 173.9(10) . . . . ?
 C17 C18 C19 C14 -3.7(15) . . . . ?
 C19 C14 C15 O4 -179.6(6) . . . . ?
 C19 C14 C15 C16 0.2(11) . . . . ?
 C20 C21 C22 C23 1.1(13) . . . . ?
 C20 C25 C26 N3 3.7(11) . . . . ?
 C21 C20 C25 C24 0.3(10) . . . . ?
 C21 C20 C25 C26 177.9(6) . . . . ?
 C21 C22 C23 C24 -0.6(14) . . . . ?
 C22 C23 C24 C25 0.0(14) . . . . ?
 C23 C24 C25 C20 0.2(12) . . . . ?
 C23 C24 C25 C26 -177.5(8) . . . . ?
 C24 C25 C26 N3 -178.6(7) . . . . ?
 C25 C20 C21 O7 -178.7(6) . . . . ?
 C25 C20 C21 C22 -0.9(11) . . . . ?
 C26 N3 C27 C28 -140.9(7) . . . . ?
 C27 N3 C26 C25 -176.1(7) . . . . ?
 C27 C28 C31 N4 67.2(9) . . . . ?
 C29 C28 C31 N4 -57.5(9) . . . . ?
 C30 C28 C31 N4 -177.7(7) . . . . ?
 C31 N4 C32 C38 172.9(7) . . . . ?
 C32 N4 C31 C28 149.8(7) . . . . ?
 C33 C34 C35 C36 -0.4(11) . . . . ?
 C34 C33 C38 C32 -176.9(6) . . . . ?
 C34 C33 C38 C37 0.5(9) . . . . ?
 C34 C35 C36 C37 -0.3(12) . . . . ?
 C35 C36 C37 C38 1.1(12) . . . . ?
 C36 C37 C38 C32 176.3(7) . . . . ?
 C36 C37 C38 C33 -1.2(10) . . . . ?
 C38 C33 C34 O8 179.5(6) . . . . ?
 C38 C33 C34 C35 0.2(9) . . . . ?

_shelx_SHELXL_version_number      '2014/7'
_olex2_submission_special_instructions 'No special instructions were received'
