# Supplementary material
Source: MDPI journal article supplement (https://www.mdpi.com/2073-8994/11/4/460)
Supplement: s1 [file s1 › 2-CuHo.cif]

data_2-CuHo

_chemical_name_common             ?
_chemical_name_systematic         ?
_chemical_formula_moiety
'C38 H40 Cu2 Ho N4 O8, 6(N O3), 2(H2 O), C38 H44 Cu2 Ho N4 O10'
_chemical_formula_sum             'C76 H88 Cu4 Ho2 N14 O38'
_chemical_formula_weight          2389.62
_chemical_melting_point           ?
loop_
  _atom_type_symbol
  _atom_type_description
  _atom_type_scat_dispersion_real
  _atom_type_scat_dispersion_imag
  _atom_type_scat_source
 'C' 'C' 0.0181 0.0091 'International Tables Vol C Tables 4.2.6.8 and 6.1.1.4'
 'H' 'H' 0.0000 0.0000 'International Tables Vol C Tables 4.2.6.8 and 6.1.1.4'
 'Cu' 'Cu' -1.9646 0.5888
 'International Tables Vol C Tables 4.2.6.8 and 6.1.1.4'
 'Ho' 'Ho' -14.9734 3.7046
 'International Tables Vol C Tables 4.2.6.8 and 6.1.1.4'
 'N' 'N' 0.0311 0.0180 'International Tables Vol C Tables 4.2.6.8 and 6.1.1.4'
 'O' 'O' 0.0492 0.0322 'International Tables Vol C Tables 4.2.6.8 and 6.1.1.4'

_shelx_space_group_comment
;
The symmetry employed for this shelxl refinement is uniquely defined
by the following loop, which should always be used as a source of
symmetry information in preference to the above space-group names.
They are only intended as comments.
;
_space_group_crystal_system       'monoclinic'
_space_group_IT_number            14
_space_group_name_H-M_alt         'P 1 21/c 1'
_space_group_name_Hall            '-P 2ybc'
loop_
  _space_group_symop_operation_xyz
 'x, y, z'
 '-x, y+1/2, -z+1/2'
 '-x, -y, -z'
 'x, -y-1/2, z-1/2'

_cell_length_a                    26.1335(13)
_cell_length_b                    15.5412(6)
_cell_length_c                    21.5147(10)
_cell_angle_alpha                 90
_cell_angle_beta                  94.386(5)
_cell_angle_gamma                 90
_cell_volume                      8712.5(7)
_cell_formula_units_Z             4
_cell_measurement_reflns_used     8748
_cell_measurement_temperature     120.01(10)
_cell_measurement_theta_max       75.7260
_cell_measurement_theta_min       3.9020
_shelx_estimated_absorpt_T_max    ?
_shelx_estimated_absorpt_T_min    ?
_exptl_absorpt_coefficient_mu     5.149
_exptl_absorpt_correction_T_max   1.00000
_exptl_absorpt_correction_T_min   0.52285
_exptl_absorpt_correction_type    multi-scan
_exptl_absorpt_process_details
;
CrysAlisPro, Agilent Technologies,
Version 1.171.37.34 (release 22-05-2014 CrysAlis171 .NET)
(compiled May 22 2014,16:03:01)
Empirical absorption correction using spherical harmonics,
 implemented in SCALE3 ABSPACK scaling algorithm.
Empirical absorption correction using spherical harmonics,
 implemented in SCALE3 ABSPACK scaling algorithm.
;
_exptl_absorpt_special_details    ?
_exptl_crystal_colour             'clear green'
_exptl_crystal_density_diffrn     1.822
_exptl_crystal_density_meas       ?
_exptl_crystal_density_method     ?
_exptl_crystal_description        prism
_exptl_crystal_F_000              4784
_exptl_crystal_size_max           0.2
_exptl_crystal_size_mid           0.1
_exptl_crystal_size_min           0.05
_exptl_transmission_factor_max    ?
_exptl_transmission_factor_min    ?
_diffrn_reflns_av_R_equivalents   0.1026
_diffrn_reflns_av_unetI/netI      0.0951
_diffrn_reflns_Laue_measured_fraction_full 0.999
_diffrn_reflns_Laue_measured_fraction_max 0.999
_diffrn_reflns_limit_h_max        31
_diffrn_reflns_limit_h_min        -31
_diffrn_reflns_limit_k_max        14
_diffrn_reflns_limit_k_min        -18
_diffrn_reflns_limit_l_max        25
_diffrn_reflns_limit_l_min        -25
_diffrn_reflns_number             60265
_diffrn_reflns_point_group_measured_fraction_full 0.999
_diffrn_reflns_point_group_measured_fraction_max 0.999
_diffrn_reflns_theta_full         67.682
_diffrn_reflns_theta_max          67.682
_diffrn_reflns_theta_min          3.311
_diffrn_ambient_environment       N~2~
_diffrn_ambient_temperature       120.01(10)
_diffrn_detector                  'CCD plate'
_diffrn_detector_area_resol_mean  5.2763
_diffrn_detector_type             AtlasS2
_diffrn_measured_fraction_theta_full 0.999
_diffrn_measured_fraction_theta_max 0.999
_diffrn_measurement_details
;

;
_diffrn_measurement_device        'four-circle diffractometer'
_diffrn_measurement_device_type   'SuperNova, Single source at offset, AtlasS2'
_diffrn_measurement_method        '\w scans'
_diffrn_radiation_monochromator   mirror
_diffrn_radiation_probe           x-ray
_diffrn_radiation_type            CuK\a
_diffrn_radiation_wavelength      1.54184
_diffrn_source                    'sealed X-ray tube'
_diffrn_source_type               'SuperNova (Cu) X-ray Source'
_reflns_Friedel_coverage          0.000
_reflns_Friedel_fraction_full     .
_reflns_Friedel_fraction_max      .
_reflns_number_gt                 10341
_reflns_number_total              15748
_reflns_odcompleteness_completeness 99.96
_reflns_odcompleteness_iscentric  1
_reflns_odcompleteness_theta      69.01
_reflns_special_details
;
 Reflections were merged by SHELXL according to the crystal
 class for the calculation of statistics and refinement.
 
 _reflns_Friedel_fraction is defined as the number of unique
 Friedel pairs measured divided by the number that would be
 possible theoretically, ignoring centric projections and
 systematic absences.
;
_reflns_threshold_expression      'I > 2\s(I)'
_computing_cell_refinement
;
CrysAlisPro, Agilent Technologies,
Version 1.171.37.34 (release 22-05-2014 CrysAlis171 .NET)
(compiled May 22 2014,16:03:01)
;
_computing_data_collection
;
CrysAlisPro, Agilent Technologies,
Version 1.171.37.34 (release 22-05-2014 CrysAlis171 .NET)
(compiled May 22 2014,16:03:01)
;
_computing_data_reduction
;
CrysAlisPro, Agilent Technologies,
Version 1.171.37.34 (release 22-05-2014 CrysAlis171 .NET)
(compiled May 22 2014,16:03:01)
;
_computing_molecular_graphics     'Olex2 (Dolomanov et al., 2009)'
_computing_publication_material   'Olex2 (Dolomanov et al., 2009)'
_computing_structure_refinement   'ShelXL (Sheldrick, 2008)'
_computing_structure_solution     'ShelXT (Sheldrick, 2008)'
_refine_diff_density_max          1.365
_refine_diff_density_min          -1.330
_refine_diff_density_rms          0.142
_refine_ls_extinction_coef        .
_refine_ls_extinction_method      none
_refine_ls_goodness_of_fit_ref    0.984
_refine_ls_hydrogen_treatment     mixed
_refine_ls_matrix_type            full
_refine_ls_number_parameters      1218
_refine_ls_number_reflns          15748
_refine_ls_number_restraints      36
_refine_ls_R_factor_all           0.0978
_refine_ls_R_factor_gt            0.0599
_refine_ls_restrained_S_all       0.986
_refine_ls_shift/su_max           0.018
_refine_ls_shift/su_mean          0.003
_refine_ls_structure_factor_coef  Fsqd
_refine_ls_weighting_details
'w=1/[\s^2^(Fo^2^)+(0.0898P)^2^] where P=(Fo^2^+2Fc^2^)/3'
_refine_ls_weighting_scheme       calc
_refine_ls_wR_factor_gt           0.1498
_refine_ls_wR_factor_ref          0.1788
_refine_special_details           ?
_olex2_refinement_description
;
1. Fixed Uiso
 At 1.2 times of:
  All C(H) groups, All C(H,H) groups
 At 1.5 times of:
  All C(H,H,H) groups, All O(H) groups, All O(H,H) groups
2. Restrained distances
 O8-H8
 0.85 with sigma of 0.01
 O11-H11
 0.85 with sigma of 0.01
 O15-H15
 0.85 with sigma of 0.01
 O34A-N14 = O32-N14 = O33A-N14
 1.22 with sigma of 0.01
 O4-H4
 0.85 with sigma of 0.01
 O3-H3
 0.85 with sigma of 0.01
 O7-H7
 0.85 with sigma of 0.01
 O16-H16
 0.85 with sigma of 0.01
 O12-H12
 0.85 with sigma of 0.01
 O29-N13 = O31-N13 = O30-N13
 1.22 with sigma of 0.01
 O34A-O33A
 2.1 with sigma of 0.02
 C34-H8
 1.850323 with sigma of 0.02
 C40-H11
 1.849327 with sigma of 0.02
 C59-H15
 1.846967 with sigma of 0.02
 O34A-O32
 2.1 with sigma of 0.02
 O32-O33A
 2.1 with sigma of 0.02
 O29-O31
 2.1 with sigma of 0.02
 O31-O30
 2.1 with sigma of 0.02
 O30-O29
 2.1 with sigma of 0.02
 C15-H4
 1.848596 with sigma of 0.02
 C2-H3
 1.85 with sigma of 0.02
 Ho1-H8
 2.984432 with sigma of 0.02
 Ho1-H4
 2.99375 with sigma of 0.02
 Ho1-H3
 2.99 with sigma of 0.02
 C21-H7
 1.848596 with sigma of 0.02
 Ho1-H7
 2.99375 with sigma of 0.02
 C72-H16
 1.848596 with sigma of 0.02
 Ho2-H11
 3.045079 with sigma of 0.02
 Ho2-H15
 3.084574 with sigma of 0.02
 Ho2-H16
 2.99375 with sigma of 0.02
 C53-H12
 1.848596 with sigma of 0.02
 Ho2-H12
 2.99375 with sigma of 0.02
3. Uiso/Uaniso restraints and constraints
Uiso(O34) = Uiso(O33A) = Uiso(O32)
Uiso(O34A) = Uiso(O33A) = Uiso(O32)
4. Others
 Fixed Sof: O33(0.5) O34(0.5) O33A(0.5) O34A(0.5) O38A(0.4) H38A(0.4) H38B(0.4) O38(0.6) H38C(0.6) H38D(0.6)
5.a Free rotating group:
 O35(H35A,H35B), O37(H37A,H37B), O36(H36A,H36B)
5.b Rotating group:
 O38A(H38A,H38B), O38(H38C,H38D)
5.c Secondary CH2 refined with riding coordinates:
 C8(H8A,H8B), C12(H12A,H12B), C27(H27A,H27B), C31(H31A,H31B), C46(H46A,H46B),
 C50(H50A,H50B), C65(H65A,H65B), C69(H69A,H69B)
5.d Aromatic/amide H refined with riding coordinates:
 C3(H3A), C4(H4A), C5(H5), C7(H7A), C13(H13), C16(H16A), C17(H17), C18(H18),
 C22(H22), C23(H23), C24(H24), C26(H26), C32(H32), C35(H35), C36(H36), C37(H37),
  C41(H41), C42(H42), C43(H43), C45(H45), C51(H51), C54(H54), C55(H55),
 C56(H56), C60(H60), C61(H61), C62(H62), C64(H64), C70(H70), C73(H73), C74(H74),
  C75(H75)
5.e Idealised Me refined as rotating group:
 C10(H10A,H10B,H10C), C11(H11A,H11B,H11C), C29(H29A,H29B,H29C), C30(H30A,H30B,
 H30C), C48(H48A,H48B,H48C), C49(H49A,H49B,H49C), C67(H67A,H67B,H67C), C68(H68A,
 H68B,H68C)
;
_atom_sites_solution_hydrogens    mixed
_atom_sites_solution_primary      direct
_atom_sites_solution_secondary    ?
loop_
  _atom_site_label
  _atom_site_type_symbol
  _atom_site_fract_x
  _atom_site_fract_y
  _atom_site_fract_z
  _atom_site_U_iso_or_equiv
  _atom_site_adp_type
  _atom_site_occupancy
  _atom_site_site_symmetry_order
  _atom_site_calc_flag
  _atom_site_refinement_flags_posn
  _atom_site_refinement_flags_adp
  _atom_site_refinement_flags_occupancy
  _atom_site_disorder_assembly
  _atom_site_disorder_group
 Ho1 Ho 0.62320(2) 0.44268(3) 0.19486(2) 0.02183(13) Uani 1 1 d D . . . .
 Cu1 Cu 0.61111(4) 0.64453(6) 0.12802(4) 0.0239(2) Uani 1 1 d . . . . .
 Cu2 Cu 0.64212(4) 0.23035(6) 0.23810(4) 0.0223(2) Uani 1 1 d . . . . .
 O1 O 0.65550(17) 0.5788(3) 0.1875(2) 0.0226(10) Uani 1 1 d . . . . .
 O2 O 0.57267(17) 0.5378(3) 0.1359(2) 0.0241(10) Uani 1 1 d . . . . .
 O3 O 0.70436(18) 0.4624(3) 0.2539(2) 0.0268(10) Uani 1 1 d D . . . .
 H3 H 0.718(3) 0.429(3) 0.282(4) 0.031 Uiso 1 1 d DR . . . .
 O4 O 0.54241(17) 0.3853(3) 0.1610(2) 0.0243(10) Uani 1 1 d D . . . .
 H4 H 0.5337(14) 0.3323(8) 0.157(3) 0.036 Uiso 1 1 d DR . . . .
 O5 O 0.64669(18) 0.3064(3) 0.1677(2) 0.0238(10) Uani 1 1 d . . . . .
 O6 O 0.61826(18) 0.3386(3) 0.2701(2) 0.0242(10) Uani 1 1 d . . . . .
 O7 O 0.66167(19) 0.4357(3) 0.0983(2) 0.0270(10) Uani 1 1 d D . . . .
 H7 H 0.669(3) 0.4771(11) 0.074(2) 0.05(3) Uiso 1 1 d D . . . .
 O8 O 0.58684(18) 0.4941(3) 0.2842(2) 0.0252(10) Uani 1 1 d D . . . .
 H8 H 0.573(3) 0.543(2) 0.2916(17) 0.038 Uiso 1 1 d DR . . . .
 O32 O 0.6648(2) 0.5834(4) 0.0476(3) 0.0513(12) Uiso 1 1 d D . . . .
 O35 O 0.4329(4) 0.3468(5) 0.7033(5) 0.079(3) Uani 1 1 d . . . . .
 H35A H 0.4558  0.3233  0.6829 0.119 Uiso 1 1 d G . . . .
 H35B H 0.4253  0.3214  0.7365 0.119 Uiso 1 1 d G . . . .
 N1 N 0.6529(2) 0.7501(4) 0.1421(3) 0.0244(12) Uani 1 1 d . . . . .
 N2 N 0.5567(2) 0.6913(4) 0.0684(3) 0.0256(12) Uani 1 1 d . . . . .
 N3 N 0.6548(2) 0.1274(3) 0.1884(3) 0.0239(12) Uani 1 1 d . . . . .
 N4 N 0.6382(2) 0.1749(4) 0.3197(3) 0.0226(12) Uani 1 1 d . . . . .
 N14 N 0.6959(3) 0.6162(6) 0.0142(4) 0.067(2) Uiso 1 1 d D . . . .
 C1 C 0.6970(2) 0.6060(5) 0.2221(3) 0.0227(14) Uani 1 1 d . . . . .
 C2 C 0.7244(2) 0.5438(4) 0.2598(3) 0.0235(14) Uani 1 1 d D . . . .
 C3 C 0.7669(3) 0.5672(5) 0.2977(3) 0.0284(15) Uani 1 1 d . . . . .
 H3A H 0.7849 0.5256 0.3215 0.034 Uiso 1 1 calc R . . . .
 C4 C 0.7831(3) 0.6526(5) 0.3009(4) 0.0385(19) Uani 1 1 d . . . . .
 H4A H 0.8115 0.6682 0.3272 0.046 Uiso 1 1 calc R . . . .
 C5 C 0.7569(3) 0.7131(6) 0.2649(4) 0.0375(19) Uani 1 1 d . . . . .
 H5 H 0.7677 0.7701 0.2676 0.045 Uiso 1 1 calc R . . . .
 C6 C 0.7142(3) 0.6922(5) 0.2242(3) 0.0258(15) Uani 1 1 d . . . . .
 C7 C 0.6911(3) 0.7565(5) 0.1837(3) 0.0283(15) Uani 1 1 d . . . . .
 H7A H 0.7057 0.8110 0.1878 0.034 Uiso 1 1 calc R . . . .
 C8 C 0.6425(3) 0.8270(4) 0.1018(4) 0.0282(16) Uani 1 1 d . . . . .
 H8A H 0.6601 0.8200 0.0641 0.034 Uiso 1 1 calc R . . . .
 H8B H 0.6568 0.8773 0.1235 0.034 Uiso 1 1 calc R . . . .
 C9 C 0.5864(3) 0.8432(5) 0.0839(3) 0.0281(15) Uani 1 1 d . . . . .
 C10 C 0.5544(3) 0.8471(5) 0.1410(4) 0.0329(17) Uani 1 1 d . . . . .
 H10A H 0.5580 0.7940 0.1637 0.049 Uiso 1 1 calc GR . . . .
 H10B H 0.5189 0.8559 0.1274 0.049 Uiso 1 1 calc GR . . . .
 H10C H 0.5662 0.8938 0.1675 0.049 Uiso 1 1 calc GR . . . .
 C11 C 0.5825(3) 0.9288(5) 0.0490(4) 0.0399(19) Uani 1 1 d . . . . .
 H11A H 0.5951 0.9742 0.0762 0.060 Uiso 1 1 calc GR . . . .
 H11B H 0.5472 0.9398 0.0353 0.060 Uiso 1 1 calc GR . . . .
 H11C H 0.6025 0.9261 0.0135 0.060 Uiso 1 1 calc GR . . . .
 C12 C 0.5654(3) 0.7740(5) 0.0385(3) 0.0336(17) Uani 1 1 d . . . . .
 H12A H 0.5332 0.7939 0.0179 0.040 Uiso 1 1 calc R . . . .
 H12B H 0.5893 0.7657 0.0068 0.040 Uiso 1 1 calc R . . . .
 C13 C 0.5142(3) 0.6537(5) 0.0520(3) 0.0272(15) Uani 1 1 d . . . . .
 H13 H 0.4916 0.6844 0.0248 0.033 Uiso 1 1 calc R . . . .
 C14 C 0.5270(2) 0.5153(4) 0.1095(3) 0.0219(14) Uani 1 1 d . . . . .
 C15 C 0.5095(2) 0.4334(5) 0.1217(3) 0.0236(14) Uani 1 1 d D . . . .
 C16 C 0.4624(3) 0.4040(5) 0.0955(3) 0.0290(16) Uani 1 1 d . . . . .
 H16A H 0.4514 0.3485 0.1036 0.035 Uiso 1 1 calc R . . . .
 C17 C 0.4320(3) 0.4588(5) 0.0570(3) 0.0292(16) Uani 1 1 d . . . . .
 H17 H 0.4002 0.4403 0.0397 0.035 Uiso 1 1 calc R . . . .
 C18 C 0.4490(3) 0.5399(5) 0.0445(3) 0.0295(16) Uani 1 1 d . . . . .
 H18 H 0.4286 0.5759 0.0185 0.035 Uiso 1 1 calc R . . . .
 C19 C 0.4966(3) 0.5695(5) 0.0703(3) 0.0231(14) Uani 1 1 d . . . . .
 C20 C 0.6639(2) 0.2876(5) 0.1121(3) 0.0210(14) Uani 1 1 d . . . . .
 C21 C 0.6731(3) 0.3586(5) 0.0734(3) 0.0243(14) Uani 1 1 d D . . . .
 C22 C 0.6930(3) 0.3456(5) 0.0166(3) 0.0292(16) Uani 1 1 d . . . . .
 H22 H 0.6991 0.3923 -0.0088 0.035 Uiso 1 1 calc R . . . .
 C23 C 0.7042(3) 0.2611(5) -0.0030(3) 0.0269(15) Uani 1 1 d . . . . .
 H23 H 0.7181 0.2519 -0.0410 0.032 Uiso 1 1 calc R . . . .
 C24 C 0.6942(3) 0.1932(5) 0.0348(3) 0.0267(15) Uani 1 1 d . . . . .
 H24 H 0.7008 0.1377 0.0214 0.032 Uiso 1 1 calc R . . . .
 C25 C 0.6742(2) 0.2043(5) 0.0931(3) 0.0234(14) Uani 1 1 d . . . . .
 C26 C 0.6675(2) 0.1290(5) 0.1315(3) 0.0248(15) Uani 1 1 d . . . . .
 H26 H 0.6729 0.0759 0.1131 0.030 Uiso 1 1 calc R . . . .
 C27 C 0.6555(3) 0.0373(5) 0.2147(4) 0.0370(18) Uani 1 1 d . . . . .
 H27A H 0.6383 -0.0007 0.1840 0.044 Uiso 1 1 calc R . . . .
 H27B H 0.6909 0.0184 0.2211 0.044 Uiso 1 1 calc R . . . .
 C28 C 0.6308(3) 0.0276(4) 0.2748(3) 0.0281(15) Uani 1 1 d . . . . .
 C29 C 0.5730(3) 0.0418(5) 0.2687(4) 0.0331(17) Uani 1 1 d . . . . .
 H29A H 0.5599 0.0375 0.3091 0.050 Uiso 1 1 calc GR . . . .
 H29B H 0.5571 -0.0012 0.2416 0.050 Uiso 1 1 calc GR . . . .
 H29C H 0.5656 0.0978 0.2516 0.050 Uiso 1 1 calc GR . . . .
 C30 C 0.6418(3) -0.0651(4) 0.2963(4) 0.0334(17) Uani 1 1 d . . . . .
 H30A H 0.6782 -0.0735 0.3027 0.050 Uiso 1 1 calc GR . . . .
 H30B H 0.6278 -0.1044 0.2650 0.050 Uiso 1 1 calc GR . . . .
 H30C H 0.6263 -0.0754 0.3347 0.050 Uiso 1 1 calc GR . . . .
 C31 C 0.6564(3) 0.0866(5) 0.3270(3) 0.0285(15) Uani 1 1 d . . . . .
 H31A H 0.6485 0.0651 0.3674 0.034 Uiso 1 1 calc R . . . .
 H31B H 0.6933 0.0853 0.3252 0.034 Uiso 1 1 calc R . . . .
 C32 C 0.6214(2) 0.2097(4) 0.3677(3) 0.0221(14) Uani 1 1 d . . . . .
 H32 H 0.6212 0.1750 0.4029 0.027 Uiso 1 1 calc R . . . .
 C33 C 0.6021(2) 0.3574(4) 0.3259(3) 0.0211(13) Uani 1 1 d . . . . .
 C34 C 0.5846(2) 0.4413(4) 0.3356(3) 0.0228(14) Uani 1 1 d D . . . .
 C35 C 0.5674(2) 0.4655(4) 0.3918(3) 0.0241(14) Uani 1 1 d . . . . .
 H35 H 0.5550 0.5208 0.3974 0.029 Uiso 1 1 calc R . . . .
 C36 C 0.5687(3) 0.4053(5) 0.4407(3) 0.0276(15) Uani 1 1 d . . . . .
 H36 H 0.5578 0.4214 0.4792 0.033 Uiso 1 1 calc R . . . .
 C37 C 0.5858(3) 0.3242(4) 0.4321(3) 0.0247(14) Uani 1 1 d . . . . .
 H37 H 0.5867 0.2855 0.4652 0.030 Uiso 1 1 calc R . . . .
 C38 C 0.6022(2) 0.2969(5) 0.3744(3) 0.0233(14) Uani 1 1 d . . . . .
 O33 O 0.7259(8) 0.5642(14) -0.0150(10) 0.066(7) Uiso 0.5 1 d . . P A 1
 O34 O 0.7006(5) 0.6917(9) 0.0082(6) 0.0513(12) Uiso 0.5 1 d . . P A 1
 O33A O 0.7397(4) 0.5877(8) 0.0211(6) 0.0513(12) Uiso 0.5 1 d D . P A 2
 O34A O 0.6789(5) 0.6769(7) -0.0200(6) 0.0513(12) Uiso 0.5 1 d D . P A 2
 Ho2 Ho 0.88215(2) 0.37444(4) 0.49079(2) 0.02715(14) Uani 1 1 d D . . . .
 Cu3 Cu 0.87199(4) 0.17163(7) 0.41878(5) 0.0282(2) Uani 1 1 d . . . . .
 Cu4 Cu 0.88578(4) 0.57789(7) 0.55977(5) 0.0271(2) Uani 1 1 d . . . . .
 O9 O 0.88217(19) 0.2915(3) 0.3992(2) 0.0278(11) Uani 1 1 d . . . . .
 O10 O 0.85876(19) 0.2308(3) 0.4964(2) 0.0290(11) Uani 1 1 d . . . . .
 O11 O 0.8838(3) 0.4584(4) 0.3961(2) 0.0422(15) Uani 1 1 d D . . . .
 H11 H 0.882(4) 0.5125(8) 0.3904(12) 0.063 Uiso 1 1 d DR . . . .
 O12 O 0.83208(19) 0.3424(3) 0.5768(2) 0.0272(10) Uani 1 1 d D . . . .
 H12 H 0.817(3) 0.3776(12) 0.599(3) 0.05(3) Uiso 1 1 d D . . . .
 O13 O 0.9223(2) 0.4682(3) 0.5657(2) 0.0314(12) Uani 1 1 d . . . . .
 O14 O 0.84172(17) 0.5062(3) 0.5050(2) 0.0261(10) Uani 1 1 d . . . . .
 O15 O 0.9392(2) 0.3060(4) 0.5716(3) 0.0409(14) Uani 1 1 d D . . . .
 H15 H 0.950(3) 0.2542(18) 0.576(3) 0.061 Uiso 1 1 d DR . . . .
 O16 O 0.79168(19) 0.3819(3) 0.4469(2) 0.0300(11) Uani 1 1 d D . . . .
 H16 H 0.7819(14) 0.353(3) 0.415(2) 0.062 Uiso 1 1 d DR . . . .
 N5 N 0.8819(2) 0.1336(4) 0.3322(3) 0.0316(14) Uani 1 1 d . . . . .
 N6 N 0.8558(2) 0.0585(4) 0.4539(3) 0.0279(13) Uani 1 1 d . . . . .
 N7 N 0.9337(3) 0.6332(4) 0.6229(3) 0.0371(16) Uani 1 1 d . . . . .
 N8 N 0.8447(2) 0.6816(4) 0.5382(3) 0.0277(13) Uani 1 1 d . . . . .
 C39 C 0.8872(2) 0.3274(5) 0.3433(3) 0.0236(14) Uani 1 1 d . . . . .
 C40 C 0.8886(3) 0.4175(5) 0.3395(3) 0.0310(16) Uani 1 1 d D . . . .
 C41 C 0.8935(3) 0.4588(5) 0.2839(3) 0.0334(17) Uani 1 1 d . . . . .
 H41 H 0.8937 0.5186 0.2822 0.040 Uiso 1 1 calc R . . . .
 C42 C 0.8980(3) 0.4111(5) 0.2306(4) 0.0353(18) Uani 1 1 d . . . . .
 H42 H 0.9023 0.4389 0.1931 0.042 Uiso 1 1 calc R . . . .
 C43 C 0.8962(3) 0.3219(5) 0.2324(3) 0.0306(16) Uani 1 1 d . . . . .
 H43 H 0.8994 0.2904 0.1962 0.037 Uiso 1 1 calc R . . . .
 C44 C 0.8897(3) 0.2793(5) 0.2885(3) 0.0300(16) Uani 1 1 d . . . . .
 C45 C 0.8873(3) 0.1859(5) 0.2872(3) 0.0327(17) Uani 1 1 d . . . . .
 H45 H 0.8901 0.1607 0.2484 0.039 Uiso 1 1 calc R . . . .
 C46 C 0.8848(3) 0.0400(5) 0.3165(4) 0.0380(19) Uani 1 1 d . . . . .
 H46A H 0.9201 0.0216 0.3242 0.046 Uiso 1 1 calc R . . . .
 H46B H 0.8756 0.0335 0.2722 0.046 Uiso 1 1 calc R . . . .
 C47 C 0.8517(3) -0.0198(5) 0.3507(4) 0.0355(18) Uani 1 1 d . . . . .
 C48 C 0.7948(3) 0.0047(6) 0.3388(4) 0.051(2) Uani 1 1 d . . . . .
 H48A H 0.7743 -0.0325 0.3625 0.076 Uiso 1 1 calc GR . . . .
 H48B H 0.7845 -0.0015 0.2952 0.076 Uiso 1 1 calc GR . . . .
 H48C H 0.7900 0.0633 0.3512 0.076 Uiso 1 1 calc GR . . . .
 C49 C 0.8605(4) -0.1100(6) 0.3255(5) 0.057(3) Uani 1 1 d . . . . .
 H49A H 0.8961 -0.1248 0.3326 0.086 Uiso 1 1 calc GR . . . .
 H49B H 0.8507 -0.1113 0.2816 0.086 Uiso 1 1 calc GR . . . .
 H49C H 0.8401 -0.1506 0.3465 0.086 Uiso 1 1 calc GR . . . .
 C50 C 0.8676(3) -0.0226(5) 0.4205(4) 0.0379(18) Uani 1 1 d . . . . .
 H50A H 0.8502 -0.0701 0.4390 0.045 Uiso 1 1 calc R . . . .
 H50B H 0.9042 -0.0334 0.4263 0.045 Uiso 1 1 calc R . . . .
 C51 C 0.8365(3) 0.0475(5) 0.5071(3) 0.0323(17) Uani 1 1 d . . . . .
 H51 H 0.8299 -0.0091 0.5180 0.039 Uiso 1 1 calc R . . . .
 C52 C 0.8348(3) 0.1997(5) 0.5435(3) 0.0276(16) Uani 1 1 d . . . . .
 C53 C 0.8199(3) 0.2592(5) 0.5882(3) 0.0276(15) Uani 1 1 d D . . . .
 C54 C 0.7951(3) 0.2332(5) 0.6387(3) 0.0306(16) Uani 1 1 d . . . . .
 H54 H 0.7851 0.2734 0.6674 0.037 Uiso 1 1 calc R . . . .
 C55 C 0.7850(3) 0.1442(5) 0.6468(3) 0.0314(17) Uani 1 1 d . . . . .
 H55 H 0.7689 0.1257 0.6815 0.038 Uiso 1 1 calc R . . . .
 C56 C 0.7988(3) 0.0860(5) 0.6036(3) 0.0327(17) Uani 1 1 d . . . . .
 H56 H 0.7914 0.0280 0.6088 0.039 Uiso 1 1 calc R . . . .
 C57 C 0.8240(3) 0.1126(5) 0.5513(3) 0.0259(15) Uani 1 1 d . . . . .
 C58 C 0.9475(3) 0.4410(5) 0.6178(3) 0.0260(15) Uani 1 1 d . . . . .
 C59 C 0.9578(3) 0.3528(5) 0.6225(4) 0.0308(16) Uani 1 1 d D . . . .
 C60 C 0.9848(3) 0.3194(6) 0.6741(4) 0.0406(19) Uani 1 1 d . . . . .
 H60 H 0.9924 0.2609 0.6757 0.049 Uiso 1 1 calc R . . . .
 C61 C 1.0009(3) 0.3722(6) 0.7238(4) 0.045(2) Uani 1 1 d . . . . .
 H61 H 1.0183 0.3491 0.7593 0.054 Uiso 1 1 calc R . . . .
 C62 C 0.9909(3) 0.4592(5) 0.7202(3) 0.0337(17) Uani 1 1 d . . . . .
 H62 H 1.0022 0.4948 0.7532 0.040 Uiso 1 1 calc R . . . .
 C63 C 0.9640(3) 0.4950(5) 0.6675(3) 0.0307(16) Uani 1 1 d . . . . .
 C64 C 0.9600(3) 0.5882(5) 0.6643(4) 0.0385(19) Uani 1 1 d . . . . .
 H64 H 0.9785 0.6188 0.6957 0.046 Uiso 1 1 calc R . . . .
 C65 C 0.9398(4) 0.7256(6) 0.6266(6) 0.066(3) Uani 1 1 d . . . . .
 H65A H 0.9615 0.7436 0.5944 0.079 Uiso 1 1 calc R . . . .
 H65B H 0.9577 0.7395 0.6665 0.079 Uiso 1 1 calc R . . . .
 C66 C 0.8903(4) 0.7783(5) 0.6198(4) 0.043(2) Uani 1 1 d . . . . .
 C67 C 0.8540(5) 0.7540(6) 0.6677(4) 0.067(3) Uani 1 1 d . . . . .
 H67A H 0.8236 0.7887 0.6621 0.100 Uiso 1 1 calc GR . . . .
 H67B H 0.8703 0.7635 0.7087 0.100 Uiso 1 1 calc GR . . . .
 H67C H 0.8449 0.6944 0.6630 0.100 Uiso 1 1 calc GR . . . .
 C68 C 0.9044(5) 0.8737(6) 0.6254(5) 0.068(3) Uani 1 1 d . . . . .
 H68A H 0.9249 0.8894 0.5920 0.102 Uiso 1 1 calc GR . . . .
 H68B H 0.9236 0.8838 0.6646 0.102 Uiso 1 1 calc GR . . . .
 H68C H 0.8737 0.9078 0.6231 0.102 Uiso 1 1 calc GR . . . .
 C69 C 0.8650(3) 0.7685(5) 0.5533(4) 0.0345(17) Uani 1 1 d . . . . .
 H69A H 0.8371 0.8096 0.5475 0.041 Uiso 1 1 calc R . . . .
 H69B H 0.8901 0.7830 0.5240 0.041 Uiso 1 1 calc R . . . .
 C70 C 0.7998(3) 0.6793(5) 0.5107(4) 0.0313(16) Uani 1 1 d . . . . .
 H70 H 0.7827 0.7317 0.5066 0.038 Uiso 1 1 calc R . . . .
 C71 C 0.7947(3) 0.5243(5) 0.4814(3) 0.0276(15) Uani 1 1 d . . . . .
 C72 C 0.7665(3) 0.4576(5) 0.4502(3) 0.0295(16) Uani 1 1 d D . . . .
 C73 C 0.7169(3) 0.4702(6) 0.4267(3) 0.038(2) Uani 1 1 d . . . . .
 H73 H 0.6982 0.4247 0.4084 0.046 Uiso 1 1 calc R . . . .
 C74 C 0.6942(3) 0.5520(5) 0.4303(4) 0.0361(18) Uani 1 1 d . . . . .
 H74 H 0.6607 0.5606 0.4137 0.043 Uiso 1 1 calc R . . . .
 C75 C 0.7214(3) 0.6194(6) 0.4583(4) 0.0393(19) Uani 1 1 d . . . . .
 H75 H 0.7066 0.6737 0.4598 0.047 Uiso 1 1 calc R . . . .
 C76 C 0.7722(3) 0.6052(6) 0.4850(4) 0.0348(18) Uani 1 1 d . . . . .
 O38A O 0.9687(4) 0.3418(7) 0.4629(5) 0.020(2) Uiso 0.4 1 d . . P D 1
 H38A H 0.9705 0.2898 0.4459 0.030 Uiso 0.4 1 d GR . P D 1
 H38B H 0.9912 0.3431 0.4961 0.030 Uiso 0.4 1 d GR . P D 1
 O38 O 0.9654(3) 0.4079(6) 0.4611(4) 0.0328(19) Uiso 0.6 1 d . . P D 2
 H38C H 0.9634 0.4477 0.4331 0.049 Uiso 0.6 1 d GR . P D 2
 H38D H 0.9792 0.3629 0.4459 0.049 Uiso 0.6 1 d GR . P D 2
 O37 O 0.9640(3) 0.1470(6) 0.4504(6) 0.090(3) Uani 1 1 d . . . . .
 H37A H 0.9800 0.1464 0.4862 0.135 Uiso 1 1 d G . . . .
 H37B H 0.9733 0.1044 0.4293 0.135 Uiso 1 1 d G . . . .
 O29 O 0.9555(4) 0.1396(6) 0.5754(4) 0.160(3) Uiso 1 1 d D . . E 1
 O30 O 0.9948(6) 0.0147(8) 0.5794(6) 0.162(5) Uiso 1 1 d D . . E 1
 O31 O 1.0041(6) 0.1038(9) 0.6555(6) 0.167(6) Uiso 1 1 d D . . E 1
 N13 N 0.9853(8) 0.0855(10) 0.6021(7) 0.198(9) Uiso 1 1 d D . . E 1
 O23 O 0.7552(2) 0.3512(4) 0.3270(3) 0.0470(16) Uani 1 1 d . . . . .
 O24 O 0.73604(19) 0.2435(4) 0.2655(2) 0.0359(13) Uani 1 1 d . . . . .
 O25 O 0.7670(2) 0.2232(4) 0.3612(3) 0.0456(15) Uani 1 1 d . . . . .
 N11 N 0.7529(2) 0.2708(4) 0.3169(3) 0.0296(14) Uani 1 1 d . . . . .
 O26 O 0.5245(3) 0.2251(4) 0.1637(3) 0.0452(15) Uani 1 1 d . . . . .
 O27 O 0.5469(2) 0.2373(4) 0.0693(2) 0.0429(14) Uani 1 1 d . . . . .
 O28 O 0.5263(3) 0.1137(4) 0.1034(4) 0.070(2) Uani 1 1 d . . . . .
 N12 N 0.5330(2) 0.1902(4) 0.1102(3) 0.0326(14) Uani 1 1 d . . . . .
 O17 O 0.7720(2) 0.4458(4) 0.6311(3) 0.0446(14) Uani 1 1 d . . . . .
 O18 O 0.8388(2) 0.5255(4) 0.6531(3) 0.0407(13) Uani 1 1 d . . . . .
 O19 O 0.7637(2) 0.5706(4) 0.6738(3) 0.0582(18) Uani 1 1 d . . . . .
 N9 N 0.7919(2) 0.5158(4) 0.6528(3) 0.0340(15) Uani 1 1 d . . . . .
 O20 O 0.8923(2) 0.6239(4) 0.3861(3) 0.0406(13) Uani 1 1 d . . . . .
 O21 O 0.9330(3) 0.7332(4) 0.4301(3) 0.0572(18) Uani 1 1 d . . . . .
 O22 O 0.9439(2) 0.6060(4) 0.4689(2) 0.0418(14) Uani 1 1 d . . . . .
 N10 N 0.9233(2) 0.6563(4) 0.4278(3) 0.0344(15) Uani 1 1 d . . . . .
 O36 O 0.3483(7) 0.2590(8) 0.6416(6) 0.143(5) Uani 1 1 d . . . . .
 H36A H 0.3551  0.2845  0.6081 0.214 Uiso 1 1 d G . . . .
 H36B H 0.3611  0.2798  0.6759 0.214 Uiso 1 1 d G . . . .

loop_
  _atom_site_aniso_label
  _atom_site_aniso_U_11
  _atom_site_aniso_U_22
  _atom_site_aniso_U_33
  _atom_site_aniso_U_23
  _atom_site_aniso_U_13
  _atom_site_aniso_U_12
 Ho1 0.0229(2) 0.0218(3) 0.0205(2) 0.0010(2) -0.00009(19) -0.0002(2)
 Cu1 0.0249(5) 0.0207(5) 0.0252(5) 0.0029(4) -0.0046(4) -0.0015(4)
 Cu2 0.0256(5) 0.0212(5) 0.0205(5) -0.0009(4) 0.0043(4) 0.0008(4)
 O1 0.027(2) 0.014(2) 0.025(2) -0.0005(18) -0.006(2) -0.0086(19)
 O2 0.019(2) 0.025(3) 0.028(2) 0.005(2) -0.0030(19) -0.0008(19)
 O3 0.024(2) 0.026(3) 0.029(2) 0.001(2) -0.003(2) 0.000(2)
 O4 0.023(2) 0.020(2) 0.029(2) -0.002(2) -0.007(2) -0.0064(19)
 O5 0.030(2) 0.021(2) 0.021(2) -0.0028(19) 0.009(2) 0.004(2)
 O6 0.028(2) 0.027(3) 0.018(2) -0.0017(19) 0.0083(19) 0.001(2)
 O7 0.034(3) 0.022(3) 0.026(2) 0.003(2) 0.005(2) -0.001(2)
 O8 0.029(3) 0.022(3) 0.024(2) 0.001(2) 0.003(2) 0.003(2)
 O35 0.075(6) 0.048(4) 0.121(7) -0.018(5) 0.048(6) 0.009(4)
 N1 0.027(3) 0.019(3) 0.027(3) 0.001(2) 0.001(2) 0.001(2)
 N2 0.030(3) 0.023(3) 0.023(3) 0.004(2) -0.003(2) 0.001(2)
 N3 0.026(3) 0.009(3) 0.038(3) 0.002(2) 0.008(3) 0.000(2)
 N4 0.025(3) 0.020(3) 0.023(3) -0.003(2) 0.001(2) -0.005(2)
 C1 0.018(3) 0.028(4) 0.022(3) 0.003(3) -0.002(3) -0.004(3)
 C2 0.021(3) 0.027(4) 0.023(3) 0.007(3) 0.005(3) 0.001(3)
 C3 0.028(4) 0.029(4) 0.027(3) 0.007(3) -0.004(3) 0.001(3)
 C4 0.032(4) 0.044(5) 0.037(4) -0.004(4) -0.014(3) -0.012(4)
 C5 0.034(4) 0.044(5) 0.034(4) 0.001(4) -0.005(3) -0.013(4)
 C6 0.025(3) 0.022(3) 0.031(4) 0.004(3) 0.001(3) -0.005(3)
 C7 0.028(4) 0.028(4) 0.028(3) -0.001(3) 0.001(3) 0.002(3)
 C8 0.034(4) 0.012(3) 0.038(4) 0.008(3) 0.000(3) -0.001(3)
 C9 0.028(4) 0.027(4) 0.027(3) -0.001(3) -0.006(3) 0.006(3)
 C10 0.035(4) 0.026(4) 0.038(4) 0.004(3) -0.001(3) 0.001(3)
 C11 0.054(5) 0.021(4) 0.044(4) 0.006(3) -0.004(4) -0.003(4)
 C12 0.037(4) 0.035(4) 0.028(4) 0.003(3) -0.004(3) -0.007(3)
 C13 0.026(4) 0.032(4) 0.022(3) -0.003(3) -0.006(3) 0.006(3)
 C14 0.018(3) 0.027(4) 0.021(3) -0.004(3) 0.003(3) 0.001(3)
 C15 0.021(3) 0.030(4) 0.021(3) -0.002(3) 0.005(3) 0.002(3)
 C16 0.023(3) 0.035(4) 0.029(4) -0.011(3) 0.005(3) -0.006(3)
 C17 0.023(3) 0.038(4) 0.026(3) -0.010(3) 0.000(3) -0.002(3)
 C18 0.018(3) 0.042(4) 0.027(3) -0.006(3) -0.005(3) 0.009(3)
 C19 0.022(3) 0.028(4) 0.020(3) -0.006(3) -0.001(3) 0.003(3)
 C20 0.015(3) 0.033(4) 0.015(3) -0.004(3) -0.001(2) -0.003(3)
 C21 0.022(3) 0.030(4) 0.021(3) 0.004(3) 0.001(3) 0.002(3)
 C22 0.029(4) 0.036(4) 0.022(3) 0.004(3) 0.003(3) 0.004(3)
 C23 0.028(4) 0.032(4) 0.021(3) -0.003(3) 0.006(3) 0.003(3)
 C24 0.022(3) 0.033(4) 0.025(3) -0.010(3) 0.002(3) -0.005(3)
 C25 0.017(3) 0.029(4) 0.024(3) 0.000(3) 0.000(3) 0.002(3)
 C26 0.020(3) 0.031(4) 0.024(3) -0.008(3) 0.004(3) -0.004(3)
 C27 0.053(5) 0.023(4) 0.038(4) -0.001(3) 0.019(4) -0.001(4)
 C28 0.037(4) 0.019(3) 0.030(4) -0.001(3) 0.011(3) 0.002(3)
 C29 0.037(4) 0.027(4) 0.037(4) -0.002(3) 0.011(3) -0.009(3)
 C30 0.045(4) 0.018(4) 0.039(4) 0.002(3) 0.017(4) 0.000(3)
 C31 0.031(4) 0.023(4) 0.032(4) -0.001(3) 0.000(3) -0.001(3)
 C32 0.023(3) 0.021(3) 0.022(3) -0.001(3) 0.003(3) -0.003(3)
 C33 0.019(3) 0.020(3) 0.024(3) -0.003(3) 0.000(3) -0.001(3)
 C34 0.020(3) 0.021(3) 0.027(3) 0.000(3) -0.001(3) -0.002(3)
 C35 0.021(3) 0.018(3) 0.033(4) -0.004(3) 0.000(3) -0.001(3)
 C36 0.024(3) 0.039(4) 0.021(3) -0.011(3) 0.004(3) -0.008(3)
 C37 0.027(3) 0.024(4) 0.023(3) -0.004(3) 0.002(3) -0.007(3)
 C38 0.020(3) 0.029(4) 0.021(3) 0.000(3) -0.001(3) -0.003(3)
 Ho2 0.0270(3) 0.0323(3) 0.0226(3) -0.0056(2) 0.0048(2) -0.0074(2)
 Cu3 0.0292(5) 0.0286(6) 0.0278(5) -0.0050(4) 0.0077(4) -0.0044(4)
 Cu4 0.0267(5) 0.0272(6) 0.0261(5) -0.0028(4) -0.0062(4) -0.0036(4)
 O9 0.036(3) 0.032(3) 0.016(2) -0.003(2) 0.007(2) -0.003(2)
 O10 0.034(3) 0.028(3) 0.027(2) -0.003(2) 0.011(2) -0.010(2)
 O11 0.066(4) 0.035(3) 0.028(3) -0.009(2) 0.020(3) -0.022(3)
 O12 0.034(3) 0.021(2) 0.027(2) -0.002(2) 0.006(2) 0.002(2)
 O13 0.038(3) 0.032(3) 0.023(2) 0.003(2) -0.008(2) -0.006(2)
 O14 0.023(2) 0.030(3) 0.025(2) -0.005(2) -0.001(2) -0.004(2)
 O15 0.029(3) 0.033(3) 0.059(4) -0.011(3) -0.009(3) 0.000(2)
 O16 0.027(2) 0.034(3) 0.029(3) -0.006(2) 0.001(2) -0.013(2)
 N5 0.035(3) 0.037(4) 0.024(3) -0.008(3) 0.009(3) 0.002(3)
 N6 0.024(3) 0.027(3) 0.032(3) 0.000(3) 0.000(3) 0.000(2)
 N7 0.038(4) 0.028(4) 0.042(4) -0.009(3) -0.014(3) -0.005(3)
 N8 0.028(3) 0.029(3) 0.025(3) -0.004(3) 0.001(3) 0.000(3)
 C39 0.015(3) 0.032(4) 0.023(3) -0.005(3) 0.001(3) 0.000(3)
 C40 0.026(4) 0.038(4) 0.029(4) -0.002(3) 0.003(3) -0.011(3)
 C41 0.033(4) 0.037(4) 0.031(4) -0.003(3) 0.005(3) -0.006(3)
 C42 0.034(4) 0.044(5) 0.028(4) 0.006(3) 0.002(3) -0.009(4)
 C43 0.025(4) 0.041(5) 0.026(3) -0.005(3) 0.002(3) 0.002(3)
 C44 0.022(3) 0.047(5) 0.021(3) -0.007(3) 0.004(3) -0.001(3)
 C45 0.035(4) 0.034(4) 0.030(4) -0.011(3) 0.005(3) 0.008(3)
 C46 0.050(5) 0.020(4) 0.045(4) -0.009(3) 0.015(4) 0.008(3)
 C47 0.036(4) 0.025(4) 0.046(5) -0.015(4) 0.002(4) 0.000(3)
 C48 0.050(5) 0.048(6) 0.053(5) -0.015(4) -0.006(4) 0.005(4)
 C49 0.070(7) 0.051(6) 0.050(5) -0.011(5) -0.004(5) 0.020(5)
 C50 0.040(4) 0.033(4) 0.042(4) -0.003(4) 0.007(4) 0.007(4)
 C51 0.025(3) 0.037(4) 0.035(4) -0.002(3) 0.003(3) 0.000(3)
 C52 0.017(3) 0.041(4) 0.024(3) 0.004(3) -0.003(3) -0.002(3)
 C53 0.019(3) 0.038(4) 0.026(3) -0.003(3) 0.000(3) -0.001(3)
 C54 0.026(4) 0.044(5) 0.022(3) 0.006(3) 0.001(3) 0.006(3)
 C55 0.024(3) 0.043(5) 0.027(3) 0.010(3) 0.005(3) -0.004(3)
 C56 0.030(4) 0.037(4) 0.032(4) 0.011(3) 0.005(3) 0.006(3)
 C57 0.024(3) 0.022(4) 0.031(4) 0.003(3) -0.003(3) 0.001(3)
 C58 0.024(3) 0.030(4) 0.025(3) 0.000(3) 0.005(3) -0.002(3)
 C59 0.021(3) 0.035(4) 0.038(4) -0.001(3) 0.007(3) -0.005(3)
 C60 0.030(4) 0.036(5) 0.056(5) 0.005(4) 0.006(4) -0.001(3)
 C61 0.033(4) 0.060(6) 0.038(4) 0.018(4) -0.016(4) -0.012(4)
 C62 0.035(4) 0.040(5) 0.025(3) 0.007(3) -0.003(3) -0.011(3)
 C63 0.027(4) 0.035(4) 0.029(4) -0.001(3) -0.002(3) 0.002(3)
 C64 0.038(4) 0.041(5) 0.034(4) -0.009(4) -0.014(4) 0.004(4)
 C65 0.062(6) 0.033(5) 0.094(8) -0.010(5) -0.049(6) -0.007(5)
 C66 0.063(6) 0.023(4) 0.040(4) -0.011(3) -0.010(4) 0.010(4)
 C67 0.129(10) 0.043(6) 0.030(4) 0.000(4) 0.012(6) 0.008(6)
 C68 0.094(8) 0.026(5) 0.078(7) -0.009(5) -0.042(7) 0.007(5)
 C69 0.044(4) 0.019(4) 0.040(4) 0.005(3) 0.000(4) -0.007(3)
 C70 0.031(4) 0.025(4) 0.038(4) -0.001(3) 0.004(3) 0.001(3)
 C71 0.026(4) 0.035(4) 0.022(3) -0.003(3) 0.002(3) -0.003(3)
 C72 0.028(4) 0.039(4) 0.022(3) 0.002(3) 0.003(3) -0.010(3)
 C73 0.028(4) 0.059(6) 0.027(4) -0.002(4) 0.002(3) -0.023(4)
 C74 0.023(4) 0.043(5) 0.042(4) 0.003(4) 0.003(3) -0.002(3)
 C75 0.028(4) 0.046(5) 0.043(4) -0.004(4) -0.001(4) 0.001(4)
 C76 0.022(4) 0.051(5) 0.031(4) -0.002(4) -0.002(3) -0.004(3)
 O37 0.053(5) 0.090(7) 0.125(8) 0.008(6) 0.000(5) -0.004(5)
 O23 0.057(4) 0.030(3) 0.050(3) -0.012(3) -0.023(3) 0.012(3)
 O24 0.027(3) 0.055(4) 0.027(3) -0.012(2) 0.003(2) -0.009(2)
 O25 0.047(3) 0.053(4) 0.036(3) 0.011(3) 0.000(3) 0.006(3)
 N11 0.023(3) 0.041(4) 0.025(3) -0.001(3) 0.001(2) 0.003(3)
 O26 0.077(4) 0.026(3) 0.035(3) -0.003(2) 0.021(3) -0.010(3)
 O27 0.048(3) 0.056(4) 0.025(3) 0.002(3) 0.006(3) 0.001(3)
 O28 0.102(6) 0.029(4) 0.084(5) -0.021(3) 0.039(5) -0.015(4)
 N12 0.031(3) 0.028(4) 0.039(4) -0.009(3) 0.005(3) -0.004(3)
 O17 0.033(3) 0.038(3) 0.065(4) -0.013(3) 0.013(3) -0.004(3)
 O18 0.037(3) 0.048(4) 0.037(3) -0.009(3) 0.003(2) -0.007(3)
 O19 0.048(4) 0.045(4) 0.084(5) -0.012(4) 0.022(4) 0.015(3)
 N9 0.035(4) 0.033(4) 0.035(3) 0.001(3) 0.007(3) -0.001(3)
 O20 0.039(3) 0.041(3) 0.039(3) 0.001(3) -0.017(3) 0.002(3)
 O21 0.082(5) 0.033(4) 0.061(4) -0.012(3) 0.030(4) -0.022(3)
 O22 0.027(3) 0.065(4) 0.032(3) 0.012(3) -0.007(2) -0.012(3)
 N10 0.035(3) 0.034(4) 0.036(3) -0.002(3) 0.014(3) -0.004(3)
 O36 0.178(13) 0.120(10) 0.117(9) -0.023(8) -0.069(10) 0.029(10)

_geom_special_details
;
 All esds (except the esd in the dihedral angle between two l.s. planes)
 are estimated using the full covariance matrix.  The cell esds are taken
 into account individually in the estimation of esds in distances, angles
 and torsion angles; correlations between esds in cell parameters are only
 used when they are defined by crystal symmetry.  An approximate (isotropic)
 treatment of cell esds is used for estimating esds involving l.s. planes.
;
loop_
  _geom_bond_atom_site_label_1
  _geom_bond_atom_site_label_2
  _geom_bond_distance
  _geom_bond_site_symmetry_2
  _geom_bond_publ_flag
 Ho1 Cu1 3.4553(11) . ?
 Ho1 Cu2 3.4538(11) . ?
 Ho1 O1 2.288(4) . ?
 Ho1 O2 2.298(4) . ?
 Ho1 O3 2.408(5) . ?
 Ho1 O4 2.355(4) . ?
 Ho1 O5 2.294(5) . ?
 Ho1 O6 2.300(5) . ?
 Ho1 O7 2.379(5) . ?
 Ho1 O8 2.348(5) . ?
 Cu1 O1 1.949(5) . ?
 Cu1 O2 1.953(5) . ?
 Cu1 N1 1.982(6) . ?
 Cu1 N2 1.979(6) . ?
 Cu2 O5 1.933(5) . ?
 Cu2 O6 1.939(5) . ?
 Cu2 N3 1.967(6) . ?
 Cu2 N4 1.965(6) . ?
 O1 C1 1.337(8) . ?
 O2 C14 1.328(8) . ?
 O3 H3 0.849(10) . ?
 O3 C2 1.371(8) . ?
 O4 H4 0.857(10) . ?
 O4 C15 1.380(8) . ?
 O5 C20 1.340(8) . ?
 O6 C33 1.335(8) . ?
 O7 H7 0.853(9) . ?
 O7 C21 1.355(8) . ?
 O8 H8 0.852(9) . ?
 O8 C34 1.383(8) . ?
 O32 N14 1.235(7) . ?
 O35 H35A 0.8498 . ?
 O35 H35B 0.8493 . ?
 N1 C7 1.292(9) . ?
 N1 C8 1.489(8) . ?
 N2 C12 1.461(9) . ?
 N2 C13 1.282(9) . ?
 N3 C26 1.292(9) . ?
 N3 C27 1.511(9) . ?
 N4 C31 1.455(9) . ?
 N4 C32 1.275(9) . ?
 N14 O33 1.32(2) . ?
 N14 O34 1.188(15) . ?
 N14 O33A 1.225(8) . ?
 N14 O34A 1.256(8) . ?
 C1 C2 1.419(9) . ?
 C1 C6 1.412(10) . ?
 C2 C3 1.375(10) . ?
 C3 H3A 0.9300 . ?
 C3 C4 1.392(11) . ?
 C4 H4A 0.9300 . ?
 C4 C5 1.369(11) . ?
 C5 H5 0.9300 . ?
 C5 C6 1.403(10) . ?
 C6 C7 1.430(10) . ?
 C7 H7A 0.9300 . ?
 C8 H8A 0.9700 . ?
 C8 H8B 0.9700 . ?
 C8 C9 1.509(10) . ?
 C9 C10 1.539(11) . ?
 C9 C11 1.527(10) . ?
 C9 C12 1.528(10) . ?
 C10 H10A 0.9600 . ?
 C10 H10B 0.9600 . ?
 C10 H10C 0.9600 . ?
 C11 H11A 0.9600 . ?
 C11 H11B 0.9600 . ?
 C11 H11C 0.9600 . ?
 C12 H12A 0.9700 . ?
 C12 H12B 0.9700 . ?
 C13 H13 0.9300 . ?
 C13 C19 1.450(10) . ?
 C14 C15 1.385(10) . ?
 C14 C19 1.397(9) . ?
 C15 C16 1.390(9) . ?
 C16 H16A 0.9300 . ?
 C16 C17 1.395(10) . ?
 C17 H17 0.9300 . ?
 C17 C18 1.369(11) . ?
 C18 H18 0.9300 . ?
 C18 C19 1.400(9) . ?
 C20 C21 1.414(10) . ?
 C20 C25 1.390(10) . ?
 C21 C22 1.379(10) . ?
 C22 H22 0.9300 . ?
 C22 C23 1.417(10) . ?
 C23 H23 0.9300 . ?
 C23 C24 1.370(10) . ?
 C24 H24 0.9300 . ?
 C24 C25 1.406(9) . ?
 C25 C26 1.451(10) . ?
 C26 H26 0.9300 . ?
 C27 H27A 0.9700 . ?
 C27 H27B 0.9700 . ?
 C27 C28 1.498(10) . ?
 C28 C29 1.521(10) . ?
 C28 C30 1.534(9) . ?
 C28 C31 1.559(10) . ?
 C29 H29A 0.9600 . ?
 C29 H29B 0.9600 . ?
 C29 H29C 0.9600 . ?
 C30 H30A 0.9600 . ?
 C30 H30B 0.9600 . ?
 C30 H30C 0.9600 . ?
 C31 H31A 0.9700 . ?
 C31 H31B 0.9700 . ?
 C32 H32 0.9300 . ?
 C32 C38 1.455(9) . ?
 C33 C34 1.401(9) . ?
 C33 C38 1.403(9) . ?
 C34 C35 1.374(10) . ?
 C35 H35 0.9300 . ?
 C35 C36 1.406(10) . ?
 C36 H36 0.9300 . ?
 C36 C37 1.355(10) . ?
 C37 H37 0.9300 . ?
 C37 C38 1.411(10) . ?
 Ho2 Cu3 3.5131(12) . ?
 Ho2 Cu4 3.4911(12) . ?
 Ho2 O9 2.354(5) . ?
 Ho2 O10 2.321(5) . ?
 Ho2 O11 2.421(5) . ?
 Ho2 O12 2.399(5) . ?
 Ho2 O13 2.359(5) . ?
 Ho2 O14 2.335(5) . ?
 Ho2 O15 2.446(6) . ?
 Ho2 O16 2.481(5) . ?
 Ho2 O38A 2.437(11) . ?
 Ho2 O38 2.372(9) . ?
 Cu3 O9 1.933(5) . ?
 Cu3 O10 1.960(5) . ?
 Cu3 N5 1.989(6) . ?
 Cu3 N6 1.972(6) . ?
 Cu4 O13 1.953(5) . ?
 Cu4 O14 1.936(5) . ?
 Cu4 N7 1.972(6) . ?
 Cu4 N8 1.972(6) . ?
 O9 C39 1.342(8) . ?
 O10 C52 1.323(9) . ?
 O11 H11 0.851(9) . ?
 O11 C40 1.388(9) . ?
 O12 H12 0.847(9) . ?
 O12 C53 1.358(9) . ?
 O13 C58 1.325(8) . ?
 O14 C71 1.323(8) . ?
 O15 H15 0.853(10) . ?
 O15 C59 1.373(9) . ?
 O16 H16 0.846(10) . ?
 O16 C72 1.353(9) . ?
 N5 C45 1.281(10) . ?
 N5 C46 1.497(10) . ?
 N6 C50 1.495(10) . ?
 N6 C51 1.296(10) . ?
 N7 C64 1.290(10) . ?
 N7 C65 1.448(11) . ?
 N8 C69 1.478(9) . ?
 N8 C70 1.274(9) . ?
 C39 C40 1.404(11) . ?
 C39 C44 1.400(10) . ?
 C40 C41 1.372(11) . ?
 C41 H41 0.9300 . ?
 C41 C42 1.378(11) . ?
 C42 H42 0.9300 . ?
 C42 C43 1.387(11) . ?
 C43 H43 0.9300 . ?
 C43 C44 1.400(10) . ?
 C44 C45 1.454(11) . ?
 C45 H45 0.9300 . ?
 C46 H46A 0.9700 . ?
 C46 H46B 0.9700 . ?
 C46 C47 1.500(12) . ?
 C47 C48 1.539(11) . ?
 C47 C49 1.527(11) . ?
 C47 C50 1.528(11) . ?
 C48 H48A 0.9600 . ?
 C48 H48B 0.9600 . ?
 C48 H48C 0.9600 . ?
 C49 H49A 0.9600 . ?
 C49 H49B 0.9600 . ?
 C49 H49C 0.9600 . ?
 C50 H50A 0.9700 . ?
 C50 H50B 0.9700 . ?
 C51 H51 0.9300 . ?
 C51 C57 1.443(10) . ?
 C52 C53 1.410(10) . ?
 C52 C57 1.395(10) . ?
 C53 C54 1.367(10) . ?
 C54 H54 0.9300 . ?
 C54 C55 1.422(11) . ?
 C55 H55 0.9300 . ?
 C55 C56 1.365(11) . ?
 C56 H56 0.9300 . ?
 C56 C57 1.409(10) . ?
 C58 C59 1.400(11) . ?
 C58 C63 1.400(10) . ?
 C59 C60 1.369(11) . ?
 C60 H60 0.9300 . ?
 C60 C61 1.389(12) . ?
 C61 H61 0.9300 . ?
 C61 C62 1.378(12) . ?
 C62 H62 0.9300 . ?
 C62 C63 1.404(10) . ?
 C63 C64 1.454(11) . ?
 C64 H64 0.9300 . ?
 C65 H65A 0.9700 . ?
 C65 H65B 0.9700 . ?
 C65 C66 1.529(13) . ?
 C66 C67 1.500(14) . ?
 C66 C68 1.532(12) . ?
 C66 C69 1.537(10) . ?
 C67 H67A 0.9600 . ?
 C67 H67B 0.9600 . ?
 C67 H67C 0.9600 . ?
 C68 H68A 0.9600 . ?
 C68 H68B 0.9600 . ?
 C68 H68C 0.9600 . ?
 C69 H69A 0.9700 . ?
 C69 H69B 0.9700 . ?
 C70 H70 0.9300 . ?
 C70 C76 1.445(11) . ?
 C71 C72 1.413(10) . ?
 C71 C76 1.392(11) . ?
 C72 C73 1.368(11) . ?
 C73 H73 0.9300 . ?
 C73 C74 1.407(12) . ?
 C74 H74 0.9300 . ?
 C74 C75 1.378(11) . ?
 C75 H75 0.9300 . ?
 C75 C76 1.425(10) . ?
 O38A H38A 0.8903 . ?
 O38A H38B 0.8896 . ?
 O38 H38C 0.8622 . ?
 O38 H38D 0.8623 . ?
 O37 H37A 0.8494 . ?
 O37 H37B 0.8503 . ?
 O29 N13 1.254(9) . ?
 O30 N13 1.237(9) . ?
 O31 N13 1.248(9) . ?
 O23 N11 1.268(8) . ?
 O24 N11 1.233(7) . ?
 O25 N11 1.241(8) . ?
 O26 N12 1.308(8) . ?
 O27 N12 1.220(9) . ?
 O28 N12 1.209(9) . ?
 O17 N9 1.278(8) . ?
 O18 N9 1.235(8) . ?
 O19 N9 1.235(9) . ?
 O20 N10 1.266(8) . ?
 O21 N10 1.220(9) . ?
 O22 N10 1.270(8) . ?
 O36 H36A 0.8022 . ?
 O36 H36B 0.8907 . ?

loop_
  _geom_angle_atom_site_label_1
  _geom_angle_atom_site_label_2
  _geom_angle_atom_site_label_3
  _geom_angle
  _geom_angle_site_symmetry_1
  _geom_angle_site_symmetry_3
  _geom_angle_publ_flag
 Cu2 Ho1 Cu1 170.46(3) . . ?
 O1 Ho1 Cu1 32.24(11) . . ?
 O1 Ho1 Cu2 148.89(12) . . ?
 O1 Ho1 O2 64.30(16) . . ?
 O1 Ho1 O3 66.67(16) . . ?
 O1 Ho1 O4 130.97(16) . . ?
 O1 Ho1 O5 136.80(17) . . ?
 O1 Ho1 O6 137.74(16) . . ?
 O1 Ho1 O7 78.39(17) . . ?
 O1 Ho1 O8 85.19(17) . . ?
 O2 Ho1 Cu1 32.42(11) . . ?
 O2 Ho1 Cu2 145.87(12) . . ?
 O2 Ho1 O3 130.93(17) . . ?
 O2 Ho1 O4 67.03(16) . . ?
 O2 Ho1 O6 141.29(17) . . ?
 O2 Ho1 O7 79.10(17) . . ?
 O2 Ho1 O8 88.90(16) . . ?
 O3 Ho1 Cu1 98.80(12) . . ?
 O3 Ho1 Cu2 82.95(12) . . ?
 O4 Ho1 Cu1 99.44(12) . . ?
 O4 Ho1 Cu2 80.08(12) . . ?
 O4 Ho1 O3 160.73(17) . . ?
 O4 Ho1 O7 98.14(17) . . ?
 O5 Ho1 Cu1 138.59(11) . . ?
 O5 Ho1 Cu2 31.88(11) . . ?
 O5 Ho1 O2 127.39(17) . . ?
 O5 Ho1 O3 90.58(17) . . ?
 O5 Ho1 O4 79.77(16) . . ?
 O5 Ho1 O6 63.93(16) . . ?
 O5 Ho1 O7 66.17(16) . . ?
 O5 Ho1 O8 131.01(16) . . ?
 O6 Ho1 Cu1 157.44(12) . . ?
 O6 Ho1 Cu2 32.09(11) . . ?
 O6 Ho1 O3 79.18(17) . . ?
 O6 Ho1 O4 81.60(16) . . ?
 O6 Ho1 O7 129.30(16) . . ?
 O6 Ho1 O8 67.37(16) . . ?
 O7 Ho1 Cu1 73.08(12) . . ?
 O7 Ho1 Cu2 97.50(12) . . ?
 O7 Ho1 O3 93.03(17) . . ?
 O8 Ho1 Cu1 90.09(12) . . ?
 O8 Ho1 Cu2 99.41(11) . . ?
 O8 Ho1 O3 85.40(16) . . ?
 O8 Ho1 O4 88.43(17) . . ?
 O8 Ho1 O7 162.68(16) . . ?
 O1 Cu1 Ho1 38.76(12) . . ?
 O1 Cu1 O2 77.42(18) . . ?
 O1 Cu1 N1 92.3(2) . . ?
 O1 Cu1 N2 168.6(2) . . ?
 O2 Cu1 Ho1 39.11(13) . . ?
 O2 Cu1 N1 166.1(2) . . ?
 O2 Cu1 N2 91.2(2) . . ?
 N1 Cu1 Ho1 131.00(16) . . ?
 N2 Cu1 Ho1 129.94(18) . . ?
 N2 Cu1 N1 98.9(2) . . ?
 O5 Cu2 Ho1 38.82(13) . . ?
 O5 Cu2 O6 77.85(19) . . ?
 O5 Cu2 N3 92.7(2) . . ?
 O5 Cu2 N4 168.3(2) . . ?
 O6 Cu2 Ho1 39.07(13) . . ?
 O6 Cu2 N3 166.2(2) . . ?
 O6 Cu2 N4 91.3(2) . . ?
 N3 Cu2 Ho1 131.08(17) . . ?
 N4 Cu2 Ho1 130.07(17) . . ?
 N4 Cu2 N3 98.7(2) . . ?
 Cu1 O1 Ho1 109.00(19) . . ?
 C1 O1 Ho1 122.8(4) . . ?
 C1 O1 Cu1 128.1(4) . . ?
 Cu1 O2 Ho1 108.47(19) . . ?
 C14 O2 Ho1 121.7(4) . . ?
 C14 O2 Cu1 129.6(4) . . ?
 Ho1 O3 H3 127(2) . . ?
 C2 O3 Ho1 118.7(4) . . ?
 C2 O3 H3 111(2) . . ?
 Ho1 O4 H4 128.4(19) . . ?
 C15 O4 Ho1 119.1(4) . . ?
 C15 O4 H4 107.8(18) . . ?
 Cu2 O5 Ho1 109.3(2) . . ?
 C20 O5 Ho1 122.9(4) . . ?
 C20 O5 Cu2 127.7(4) . . ?
 Cu2 O6 Ho1 108.84(19) . . ?
 C33 O6 Ho1 121.2(4) . . ?
 C33 O6 Cu2 130.0(4) . . ?
 Ho1 O7 H7 128.2(16) . . ?
 C21 O7 Ho1 120.4(4) . . ?
 C21 O7 H7 111.4(16) . . ?
 Ho1 O8 H8 130.9(16) . . ?
 C34 O8 Ho1 119.8(4) . . ?
 C34 O8 H8 109.3(16) . . ?
 H35A O35 H35B 109.5 . . ?
 C7 N1 Cu1 123.9(5) . . ?
 C7 N1 C8 116.0(6) . . ?
 C8 N1 Cu1 120.1(4) . . ?
 C12 N2 Cu1 118.8(5) . . ?
 C13 N2 Cu1 125.1(5) . . ?
 C13 N2 C12 116.1(6) . . ?
 C26 N3 Cu2 124.5(5) . . ?
 C26 N3 C27 112.0(6) . . ?
 C27 N3 Cu2 123.2(5) . . ?
 C31 N4 Cu2 118.1(4) . . ?
 C32 N4 Cu2 125.6(5) . . ?
 C32 N4 C31 116.3(6) . . ?
 O32 N14 O33 117.7(13) . . ?
 O32 N14 O34A 115.6(9) . . ?
 O34 N14 O32 123.3(11) . . ?
 O34 N14 O33 118.9(13) . . ?
 O33A N14 O32 115.5(9) . . ?
 O33A N14 O34A 128.8(10) . . ?
 O1 C1 C2 117.1(6) . . ?
 O1 C1 C6 124.0(6) . . ?
 C6 C1 C2 118.9(6) . . ?
 O3 C2 C1 113.8(6) . . ?
 O3 C2 C3 125.7(6) . . ?
 C3 C2 C1 120.5(6) . . ?
 C2 C3 H3A 119.7 . . ?
 C2 C3 C4 120.7(7) . . ?
 C4 C3 H3A 119.7 . . ?
 C3 C4 H4A 120.3 . . ?
 C5 C4 C3 119.3(7) . . ?
 C5 C4 H4A 120.4 . . ?
 C4 C5 H5 118.9 . . ?
 C4 C5 C6 122.2(8) . . ?
 C6 C5 H5 118.9 . . ?
 C1 C6 C7 121.7(6) . . ?
 C5 C6 C1 118.4(7) . . ?
 C5 C6 C7 119.8(7) . . ?
 N1 C7 C6 129.5(7) . . ?
 N1 C7 H7A 115.2 . . ?
 C6 C7 H7A 115.2 . . ?
 N1 C8 H8A 108.7 . . ?
 N1 C8 H8B 108.7 . . ?
 N1 C8 C9 114.4(6) . . ?
 H8A C8 H8B 107.6 . . ?
 C9 C8 H8A 108.7 . . ?
 C9 C8 H8B 108.7 . . ?
 C8 C9 C10 112.3(6) . . ?
 C8 C9 C11 107.3(6) . . ?
 C8 C9 C12 109.9(6) . . ?
 C11 C9 C10 109.8(6) . . ?
 C12 C9 C10 110.4(6) . . ?
 C12 C9 C11 106.9(6) . . ?
 C9 C10 H10A 109.5 . . ?
 C9 C10 H10B 109.5 . . ?
 C9 C10 H10C 109.5 . . ?
 H10A C10 H10B 109.5 . . ?
 H10A C10 H10C 109.5 . . ?
 H10B C10 H10C 109.5 . . ?
 C9 C11 H11A 109.5 . . ?
 C9 C11 H11B 109.5 . . ?
 C9 C11 H11C 109.4 . . ?
 H11A C11 H11B 109.5 . . ?
 H11A C11 H11C 109.5 . . ?
 H11B C11 H11C 109.5 . . ?
 N2 C12 C9 113.4(6) . . ?
 N2 C12 H12A 108.9 . . ?
 N2 C12 H12B 108.9 . . ?
 C9 C12 H12A 108.9 . . ?
 C9 C12 H12B 108.9 . . ?
 H12A C12 H12B 107.7 . . ?
 N2 C13 H13 115.7 . . ?
 N2 C13 C19 128.6(6) . . ?
 C19 C13 H13 115.7 . . ?
 O2 C14 C15 117.4(6) . . ?
 O2 C14 C19 123.5(6) . . ?
 C15 C14 C19 119.2(6) . . ?
 O4 C15 C14 114.5(6) . . ?
 O4 C15 C16 124.1(6) . . ?
 C14 C15 C16 121.4(7) . . ?
 C15 C16 H16A 120.4 . . ?
 C15 C16 C17 119.1(7) . . ?
 C17 C16 H16A 120.4 . . ?
 C16 C17 H17 120.0 . . ?
 C18 C17 C16 120.0(7) . . ?
 C18 C17 H17 120.0 . . ?
 C17 C18 H18 119.4 . . ?
 C17 C18 C19 121.1(7) . . ?
 C19 C18 H18 119.4 . . ?
 C14 C19 C13 122.0(6) . . ?
 C14 C19 C18 119.2(7) . . ?
 C18 C19 C13 118.7(6) . . ?
 O5 C20 C21 116.1(6) . . ?
 O5 C20 C25 123.4(6) . . ?
 C25 C20 C21 120.5(6) . . ?
 O7 C21 C20 113.9(6) . . ?
 O7 C21 C22 126.1(6) . . ?
 C22 C21 C20 120.0(7) . . ?
 C21 C22 H22 120.0 . . ?
 C21 C22 C23 120.1(7) . . ?
 C23 C22 H22 120.0 . . ?
 C22 C23 H23 120.6 . . ?
 C24 C23 C22 118.9(6) . . ?
 C24 C23 H23 120.5 . . ?
 C23 C24 H24 118.8 . . ?
 C23 C24 C25 122.5(7) . . ?
 C25 C24 H24 118.8 . . ?
 C20 C25 C24 118.1(7) . . ?
 C20 C25 C26 123.4(6) . . ?
 C24 C25 C26 118.5(6) . . ?
 N3 C26 C25 127.2(6) . . ?
 N3 C26 H26 116.4 . . ?
 C25 C26 H26 116.4 . . ?
 N3 C27 H27A 108.5 . . ?
 N3 C27 H27B 108.5 . . ?
 H27A C27 H27B 107.5 . . ?
 C28 C27 N3 115.0(6) . . ?
 C28 C27 H27A 108.5 . . ?
 C28 C27 H27B 108.5 . . ?
 C27 C28 C29 113.7(7) . . ?
 C27 C28 C30 105.7(6) . . ?
 C27 C28 C31 111.9(6) . . ?
 C29 C28 C30 108.9(6) . . ?
 C29 C28 C31 110.2(6) . . ?
 C30 C28 C31 106.0(6) . . ?
 C28 C29 H29A 109.5 . . ?
 C28 C29 H29B 109.5 . . ?
 C28 C29 H29C 109.5 . . ?
 H29A C29 H29B 109.5 . . ?
 H29A C29 H29C 109.5 . . ?
 H29B C29 H29C 109.5 . . ?
 C28 C30 H30A 109.4 . . ?
 C28 C30 H30B 109.5 . . ?
 C28 C30 H30C 109.5 . . ?
 H30A C30 H30B 109.5 . . ?
 H30A C30 H30C 109.5 . . ?
 H30B C30 H30C 109.5 . . ?
 N4 C31 C28 111.0(6) . . ?
 N4 C31 H31A 109.4 . . ?
 N4 C31 H31B 109.5 . . ?
 C28 C31 H31A 109.4 . . ?
 C28 C31 H31B 109.5 . . ?
 H31A C31 H31B 108.0 . . ?
 N4 C32 H32 115.9 . . ?
 N4 C32 C38 128.2(6) . . ?
 C38 C32 H32 115.9 . . ?
 O6 C33 C34 117.8(6) . . ?
 O6 C33 C38 122.5(6) . . ?
 C34 C33 C38 119.7(6) . . ?
 O8 C34 C33 113.5(6) . . ?
 C35 C34 O8 125.3(6) . . ?
 C35 C34 C33 121.2(6) . . ?
 C34 C35 H35 120.5 . . ?
 C34 C35 C36 119.1(6) . . ?
 C36 C35 H35 120.5 . . ?
 C35 C36 H36 119.8 . . ?
 C37 C36 C35 120.4(6) . . ?
 C37 C36 H36 119.8 . . ?
 C36 C37 H37 119.2 . . ?
 C36 C37 C38 121.7(7) . . ?
 C38 C37 H37 119.1 . . ?
 C33 C38 C32 122.2(6) . . ?
 C33 C38 C37 118.0(6) . . ?
 C37 C38 C32 119.8(6) . . ?
 Cu4 Ho2 Cu3 177.11(3) . . ?
 O9 Ho2 Cu3 31.19(12) . . ?
 O9 Ho2 Cu4 148.20(12) . . ?
 O9 Ho2 O11 65.81(17) . . ?
 O9 Ho2 O12 124.53(17) . . ?
 O9 Ho2 O13 151.80(18) . . ?
 O9 Ho2 O15 108.50(18) . . ?
 O9 Ho2 O16 76.60(17) . . ?
 O9 Ho2 O38A 67.7(3) . . ?
 O9 Ho2 O38 80.5(2) . . ?
 O10 Ho2 Cu3 31.61(12) . . ?
 O10 Ho2 Cu4 148.00(12) . . ?
 O10 Ho2 O9 62.19(17) . . ?
 O10 Ho2 O11 125.71(17) . . ?
 O10 Ho2 O12 66.35(16) . . ?
 O10 Ho2 O13 131.62(17) . . ?
 O10 Ho2 O14 135.51(17) . . ?
 O10 Ho2 O15 72.12(18) . . ?
 O10 Ho2 O16 79.49(18) . . ?
 O10 Ho2 O38A 93.7(3) . . ?
 O10 Ho2 O38 118.4(3) . . ?
 O11 Ho2 Cu3 96.78(12) . . ?
 O11 Ho2 Cu4 82.41(12) . . ?
 O11 Ho2 O15 141.6(2) . . ?
 O11 Ho2 O16 74.5(2) . . ?
 O11 Ho2 O38A 80.2(3) . . ?
 O12 Ho2 Cu3 97.28(12) . . ?
 O12 Ho2 Cu4 81.88(12) . . ?
 O12 Ho2 O11 143.7(2) . . ?
 O12 Ho2 O15 72.56(19) . . ?
 O12 Ho2 O16 75.12(17) . . ?
 O12 Ho2 O38A 135.9(3) . . ?
 O13 Ho2 Cu3 150.48(13) . . ?
 O13 Ho2 Cu4 32.20(13) . . ?
 O13 Ho2 O11 101.90(17) . . ?
 O13 Ho2 O12 80.90(17) . . ?
 O13 Ho2 O15 64.41(18) . . ?
 O13 Ho2 O16 126.35(18) . . ?
 O13 Ho2 O38A 85.6(3) . . ?
 O13 Ho2 O38 71.3(2) . . ?
 O14 Ho2 Cu3 145.57(11) . . ?
 O14 Ho2 Cu4 31.56(11) . . ?
 O14 Ho2 O9 128.22(17) . . ?
 O14 Ho2 O11 71.02(18) . . ?
 O14 Ho2 O12 78.59(16) . . ?
 O14 Ho2 O13 63.32(17) . . ?
 O14 Ho2 O15 123.10(17) . . ?
 O14 Ho2 O16 65.25(16) . . ?
 O14 Ho2 O38A 130.7(3) . . ?
 O14 Ho2 O38 106.1(3) . . ?
 O15 Ho2 Cu3 86.81(13) . . ?
 O15 Ho2 Cu4 95.55(13) . . ?
 O15 Ho2 O16 143.36(19) . . ?
 O16 Ho2 Cu3 80.58(12) . . ?
 O16 Ho2 Cu4 96.53(12) . . ?
 O38A Ho2 Cu3 75.2(3) . . ?
 O38A Ho2 Cu4 107.3(3) . . ?
 O38A Ho2 O15 63.7(3) . . ?
 O38A Ho2 O16 142.3(3) . . ?
 O38 Ho2 Cu3 96.8(2) . . ?
 O38 Ho2 Cu4 85.4(2) . . ?
 O38 Ho2 O11 65.2(3) . . ?
 O38 Ho2 O12 145.0(2) . . ?
 O38 Ho2 O15 76.4(3) . . ?
 O38 Ho2 O16 139.0(2) . . ?
 O9 Cu3 Ho2 39.12(13) . . ?
 O9 Cu3 O10 76.7(2) . . ?
 O9 Cu3 N5 93.0(2) . . ?
 O9 Cu3 N6 168.4(2) . . ?
 O10 Cu3 Ho2 38.36(14) . . ?
 O10 Cu3 N5 168.8(3) . . ?
 O10 Cu3 N6 92.0(2) . . ?
 N5 Cu3 Ho2 131.9(2) . . ?
 N6 Cu3 Ho2 129.92(18) . . ?
 N6 Cu3 N5 98.1(3) . . ?
 O13 Cu4 Ho2 40.07(14) . . ?
 O13 Cu4 N7 93.1(2) . . ?
 O13 Cu4 N8 169.5(2) . . ?
 O14 Cu4 Ho2 39.15(15) . . ?
 O14 Cu4 O13 78.6(2) . . ?
 O14 Cu4 N7 170.6(3) . . ?
 O14 Cu4 N8 92.2(2) . . ?
 N7 Cu4 Ho2 133.0(2) . . ?
 N7 Cu4 N8 96.4(3) . . ?
 N8 Cu4 Ho2 130.05(17) . . ?
 Cu3 O9 Ho2 109.7(2) . . ?
 C39 O9 Ho2 122.0(4) . . ?
 C39 O9 Cu3 128.3(4) . . ?
 Cu3 O10 Ho2 110.0(2) . . ?
 C52 O10 Ho2 122.2(5) . . ?
 C52 O10 Cu3 127.3(5) . . ?
 Ho2 O11 H11 130.6(16) . . ?
 C40 O11 Ho2 120.0(5) . . ?
 C40 O11 H11 109.4(16) . . ?
 Ho2 O12 H12 127.6(17) . . ?
 C53 O12 Ho2 119.1(4) . . ?
 C53 O12 H12 112.6(17) . . ?
 Cu4 O13 Ho2 107.7(2) . . ?
 C58 O13 Ho2 123.2(4) . . ?
 C58 O13 Cu4 122.8(5) . . ?
 Cu4 O14 Ho2 109.3(2) . . ?
 C71 O14 Ho2 123.6(4) . . ?
 C71 O14 Cu4 127.0(5) . . ?
 Ho2 O15 H15 131.2(16) . . ?
 C59 O15 Ho2 119.8(5) . . ?
 C59 O15 H15 109.0(16) . . ?
 Ho2 O16 H16 120.3(19) . . ?
 C72 O16 Ho2 118.3(4) . . ?
 C72 O16 H16 113(2) . . ?
 C45 N5 Cu3 123.4(5) . . ?
 C45 N5 C46 115.8(6) . . ?
 C46 N5 Cu3 120.9(5) . . ?
 C50 N6 Cu3 120.6(5) . . ?
 C51 N6 Cu3 124.4(5) . . ?
 C51 N6 C50 115.0(6) . . ?
 C64 N7 Cu4 121.1(6) . . ?
 C64 N7 C65 116.7(7) . . ?
 C65 N7 Cu4 122.2(5) . . ?
 C69 N8 Cu4 121.0(5) . . ?
 C70 N8 Cu4 123.5(5) . . ?
 C70 N8 C69 115.5(6) . . ?
 O9 C39 C40 118.1(6) . . ?
 O9 C39 C44 123.2(7) . . ?
 C44 C39 C40 118.7(7) . . ?
 O11 C40 C39 113.6(6) . . ?
 C41 C40 O11 124.9(7) . . ?
 C41 C40 C39 121.4(7) . . ?
 C40 C41 H41 120.2 . . ?
 C40 C41 C42 119.6(8) . . ?
 C42 C41 H41 120.2 . . ?
 C41 C42 H42 119.7 . . ?
 C41 C42 C43 120.6(7) . . ?
 C43 C42 H42 119.7 . . ?
 C42 C43 H43 119.9 . . ?
 C42 C43 C44 120.2(7) . . ?
 C44 C43 H43 119.9 . . ?
 C39 C44 C45 123.0(7) . . ?
 C43 C44 C39 119.4(7) . . ?
 C43 C44 C45 117.6(7) . . ?
 N5 C45 C44 128.7(7) . . ?
 N5 C45 H45 115.6 . . ?
 C44 C45 H45 115.7 . . ?
 N5 C46 H46A 108.1 . . ?
 N5 C46 H46B 108.1 . . ?
 N5 C46 C47 116.8(6) . . ?
 H46A C46 H46B 107.3 . . ?
 C47 C46 H46A 108.1 . . ?
 C47 C46 H46B 108.1 . . ?
 C46 C47 C48 110.5(7) . . ?
 C46 C47 C49 106.7(7) . . ?
 C46 C47 C50 112.1(7) . . ?
 C49 C47 C48 109.7(7) . . ?
 C50 C47 C48 111.0(7) . . ?
 C50 C47 C49 106.6(7) . . ?
 C47 C48 H48A 109.5 . . ?
 C47 C48 H48B 109.5 . . ?
 C47 C48 H48C 109.5 . . ?
 H48A C48 H48B 109.5 . . ?
 H48A C48 H48C 109.5 . . ?
 H48B C48 H48C 109.5 . . ?
 C47 C49 H49A 109.5 . . ?
 C47 C49 H49B 109.5 . . ?
 C47 C49 H49C 109.4 . . ?
 H49A C49 H49B 109.5 . . ?
 H49A C49 H49C 109.5 . . ?
 H49B C49 H49C 109.5 . . ?
 N6 C50 C47 113.5(6) . . ?
 N6 C50 H50A 108.9 . . ?
 N6 C50 H50B 108.9 . . ?
 C47 C50 H50A 108.9 . . ?
 C47 C50 H50B 108.9 . . ?
 H50A C50 H50B 107.7 . . ?
 N6 C51 H51 116.1 . . ?
 N6 C51 C57 127.7(7) . . ?
 C57 C51 H51 116.1 . . ?
 O10 C52 C53 117.0(7) . . ?
 O10 C52 C57 123.9(7) . . ?
 C57 C52 C53 119.1(7) . . ?
 O12 C53 C52 114.9(6) . . ?
 O12 C53 C54 123.8(7) . . ?
 C54 C53 C52 121.4(7) . . ?
 C53 C54 H54 120.4 . . ?
 C53 C54 C55 119.3(7) . . ?
 C55 C54 H54 120.4 . . ?
 C54 C55 H55 120.0 . . ?
 C56 C55 C54 120.0(7) . . ?
 C56 C55 H55 120.0 . . ?
 C55 C56 H56 119.6 . . ?
 C55 C56 C57 120.9(7) . . ?
 C57 C56 H56 119.5 . . ?
 C52 C57 C51 122.9(7) . . ?
 C52 C57 C56 119.4(7) . . ?
 C56 C57 C51 117.7(7) . . ?
 O13 C58 C59 117.0(6) . . ?
 O13 C58 C63 123.9(7) . . ?
 C63 C58 C59 119.1(7) . . ?
 O15 C59 C58 114.0(7) . . ?
 C60 C59 O15 125.1(7) . . ?
 C60 C59 C58 120.9(7) . . ?
 C59 C60 H60 119.7 . . ?
 C59 C60 C61 120.5(8) . . ?
 C61 C60 H60 119.8 . . ?
 C60 C61 H61 120.3 . . ?
 C62 C61 C60 119.4(7) . . ?
 C62 C61 H61 120.3 . . ?
 C61 C62 H62 119.5 . . ?
 C61 C62 C63 121.0(7) . . ?
 C63 C62 H62 119.5 . . ?
 C58 C63 C62 119.0(7) . . ?
 C58 C63 C64 123.0(7) . . ?
 C62 C63 C64 117.5(7) . . ?
 N7 C64 C63 127.2(7) . . ?
 N7 C64 H64 116.4 . . ?
 C63 C64 H64 116.4 . . ?
 N7 C65 H65A 108.3 . . ?
 N7 C65 H65B 108.3 . . ?
 N7 C65 C66 115.9(8) . . ?
 H65A C65 H65B 107.4 . . ?
 C66 C65 H65A 108.3 . . ?
 C66 C65 H65B 108.3 . . ?
 C65 C66 C68 108.2(8) . . ?
 C65 C66 C69 109.6(7) . . ?
 C67 C66 C65 112.0(9) . . ?
 C67 C66 C68 110.6(8) . . ?
 C67 C66 C69 111.5(8) . . ?
 C68 C66 C69 104.6(7) . . ?
 C66 C67 H67A 109.5 . . ?
 C66 C67 H67B 109.5 . . ?
 C66 C67 H67C 109.5 . . ?
 H67A C67 H67B 109.5 . . ?
 H67A C67 H67C 109.5 . . ?
 H67B C67 H67C 109.5 . . ?
 C66 C68 H68A 109.5 . . ?
 C66 C68 H68B 109.5 . . ?
 C66 C68 H68C 109.5 . . ?
 H68A C68 H68B 109.5 . . ?
 H68A C68 H68C 109.5 . . ?
 H68B C68 H68C 109.5 . . ?
 N8 C69 C66 114.6(6) . . ?
 N8 C69 H69A 108.6 . . ?
 N8 C69 H69B 108.6 . . ?
 C66 C69 H69A 108.6 . . ?
 C66 C69 H69B 108.6 . . ?
 H69A C69 H69B 107.6 . . ?
 N8 C70 H70 116.0 . . ?
 N8 C70 C76 127.9(7) . . ?
 C76 C70 H70 116.0 . . ?
 O14 C71 C72 117.5(7) . . ?
 O14 C71 C76 123.6(7) . . ?
 C76 C71 C72 118.9(7) . . ?
 O16 C72 C71 115.1(6) . . ?
 O16 C72 C73 123.8(7) . . ?
 C73 C72 C71 121.0(8) . . ?
 C72 C73 H73 120.0 . . ?
 C72 C73 C74 120.0(7) . . ?
 C74 C73 H73 120.0 . . ?
 C73 C74 H74 119.8 . . ?
 C75 C74 C73 120.4(7) . . ?
 C75 C74 H74 119.8 . . ?
 C74 C75 H75 120.2 . . ?
 C74 C75 C76 119.5(8) . . ?
 C76 C75 H75 120.3 . . ?
 C71 C76 C70 122.7(7) . . ?
 C71 C76 C75 120.1(7) . . ?
 C75 C76 C70 117.0(8) . . ?
 Ho2 O38A H38A 111.8 . . ?
 Ho2 O38A H38B 111.6 . . ?
 H38A O38A H38B 107.3 . . ?
 Ho2 O38 H38C 109.7 . . ?
 Ho2 O38 H38D 110.1 . . ?
 H38C O38 H38D 108.9 . . ?
 H37A O37 H37B 109.6 . . ?
 O30 N13 O29 123.4(13) . . ?
 O30 N13 O31 119.3(12) . . ?
 O31 N13 O29 117.2(12) . . ?
 O24 N11 O23 120.1(6) . . ?
 O24 N11 O25 123.3(7) . . ?
 O25 N11 O23 116.6(6) . . ?
 O27 N12 O26 117.8(6) . . ?
 O28 N12 O26 118.8(7) . . ?
 O28 N12 O27 123.4(7) . . ?
 O18 N9 O17 118.9(7) . . ?
 O18 N9 O19 122.2(7) . . ?
 O19 N9 O17 118.9(7) . . ?
 O20 N10 O22 117.6(6) . . ?
 O21 N10 O20 122.5(7) . . ?
 O21 N10 O22 120.0(7) . . ?
 H36A O36 H36B 116.9 . . ?

loop_
  _geom_torsion_atom_site_label_1
  _geom_torsion_atom_site_label_2
  _geom_torsion_atom_site_label_3
  _geom_torsion_atom_site_label_4
  _geom_torsion
  _geom_torsion_site_symmetry_1
  _geom_torsion_site_symmetry_2
  _geom_torsion_site_symmetry_3
  _geom_torsion_site_symmetry_4
  _geom_torsion_publ_flag
 Ho1 O1 C1 C2 6.6(8) . . . . ?
 Ho1 O1 C1 C6 -172.0(5) . . . . ?
 Ho1 O2 C14 C15 3.7(8) . . . . ?
 Ho1 O2 C14 C19 -176.0(5) . . . . ?
 Ho1 O3 C2 C1 -8.3(7) . . . . ?
 Ho1 O3 C2 C3 171.9(6) . . . . ?
 Ho1 O4 C15 C14 -4.2(7) . . . . ?
 Ho1 O4 C15 C16 175.5(5) . . . . ?
 Ho1 O5 C20 C21 7.8(7) . . . . ?
 Ho1 O5 C20 C25 -174.5(5) . . . . ?
 Ho1 O6 C33 C34 4.5(8) . . . . ?
 Ho1 O6 C33 C38 -175.1(5) . . . . ?
 Ho1 O7 C21 C20 -4.8(7) . . . . ?
 Ho1 O7 C21 C22 176.6(5) . . . . ?
 Ho1 O8 C34 C33 -4.3(7) . . . . ?
 Ho1 O8 C34 C35 175.6(5) . . . . ?
 Cu1 O1 C1 C2 -176.9(4) . . . . ?
 Cu1 O1 C1 C6 4.5(10) . . . . ?
 Cu1 O2 C14 C15 177.7(4) . . . . ?
 Cu1 O2 C14 C19 -2.0(9) . . . . ?
 Cu1 N1 C7 C6 5.1(11) . . . . ?
 Cu1 N1 C8 C9 37.9(8) . . . . ?
 Cu1 N2 C12 C9 -46.6(8) . . . . ?
 Cu1 N2 C13 C19 -2.5(11) . . . . ?
 Cu2 O5 C20 C21 -167.4(4) . . . . ?
 Cu2 O5 C20 C25 10.3(9) . . . . ?
 Cu2 O6 C33 C34 -177.1(4) . . . . ?
 Cu2 O6 C33 C38 3.2(9) . . . . ?
 Cu2 N3 C26 C25 -0.7(10) . . . . ?
 Cu2 N3 C27 C28 17.6(10) . . . . ?
 Cu2 N4 C31 C28 -52.3(7) . . . . ?
 Cu2 N4 C32 C38 -1.2(10) . . . . ?
 O1 C1 C2 O3 1.5(9) . . . . ?
 O1 C1 C2 C3 -178.6(6) . . . . ?
 O1 C1 C6 C5 176.8(7) . . . . ?
 O1 C1 C6 C7 -6.8(11) . . . . ?
 O2 C14 C15 O4 0.5(9) . . . . ?
 O2 C14 C15 C16 -179.3(6) . . . . ?
 O2 C14 C19 C13 4.2(10) . . . . ?
 O2 C14 C19 C18 179.9(6) . . . . ?
 O3 C2 C3 C4 -178.7(7) . . . . ?
 O4 C15 C16 C17 179.2(6) . . . . ?
 O5 C20 C21 O7 -1.6(8) . . . . ?
 O5 C20 C21 C22 177.1(6) . . . . ?
 O5 C20 C25 C24 -177.3(6) . . . . ?
 O5 C20 C25 C26 -0.1(10) . . . . ?
 O6 C33 C34 O8 0.0(9) . . . . ?
 O6 C33 C34 C35 -179.9(6) . . . . ?
 O6 C33 C38 C32 1.5(10) . . . . ?
 O6 C33 C38 C37 178.1(6) . . . . ?
 O7 C21 C22 C23 178.6(6) . . . . ?
 O8 C34 C35 C36 -178.2(6) . . . . ?
 N1 C8 C9 C10 53.3(8) . . . . ?
 N1 C8 C9 C11 174.1(6) . . . . ?
 N1 C8 C9 C12 -70.0(8) . . . . ?
 N2 C13 C19 C14 -1.9(12) . . . . ?
 N2 C13 C19 C18 -177.6(7) . . . . ?
 N3 C27 C28 C29 67.3(9) . . . . ?
 N3 C27 C28 C30 -173.2(6) . . . . ?
 N3 C27 C28 C31 -58.4(9) . . . . ?
 N4 C32 C38 C33 -2.6(11) . . . . ?
 N4 C32 C38 C37 -179.1(7) . . . . ?
 C1 C2 C3 C4 1.5(11) . . . . ?
 C1 C6 C7 N1 1.6(12) . . . . ?
 C2 C1 C6 C5 -1.8(10) . . . . ?
 C2 C1 C6 C7 174.7(6) . . . . ?
 C2 C3 C4 C5 -1.2(12) . . . . ?
 C3 C4 C5 C6 -0.6(13) . . . . ?
 C4 C5 C6 C1 2.1(12) . . . . ?
 C4 C5 C6 C7 -174.4(8) . . . . ?
 C5 C6 C7 N1 178.1(8) . . . . ?
 C6 C1 C2 O3 -179.8(6) . . . . ?
 C6 C1 C2 C3 0.0(10) . . . . ?
 C7 N1 C8 C9 -144.6(7) . . . . ?
 C8 N1 C7 C6 -172.3(7) . . . . ?
 C8 C9 C12 N2 75.6(8) . . . . ?
 C10 C9 C12 N2 -48.8(8) . . . . ?
 C11 C9 C12 N2 -168.2(7) . . . . ?
 C12 N2 C13 C19 175.6(7) . . . . ?
 C13 N2 C12 C9 135.2(7) . . . . ?
 C14 C15 C16 C17 -1.0(10) . . . . ?
 C15 C14 C19 C13 -175.5(6) . . . . ?
 C15 C14 C19 C18 0.2(10) . . . . ?
 C15 C16 C17 C18 1.1(10) . . . . ?
 C16 C17 C18 C19 -0.5(11) . . . . ?
 C17 C18 C19 C13 175.7(6) . . . . ?
 C17 C18 C19 C14 -0.2(10) . . . . ?
 C19 C14 C15 O4 -179.8(6) . . . . ?
 C19 C14 C15 C16 0.4(10) . . . . ?
 C20 C21 C22 C23 0.1(10) . . . . ?
 C20 C25 C26 N3 -5.0(11) . . . . ?
 C21 C20 C25 C24 0.3(9) . . . . ?
 C21 C20 C25 C26 177.6(6) . . . . ?
 C21 C22 C23 C24 0.9(11) . . . . ?
 C22 C23 C24 C25 -1.4(10) . . . . ?
 C23 C24 C25 C20 0.7(10) . . . . ?
 C23 C24 C25 C26 -176.7(6) . . . . ?
 C24 C25 C26 N3 172.3(7) . . . . ?
 C25 C20 C21 O7 -179.4(6) . . . . ?
 C25 C20 C21 C22 -0.8(10) . . . . ?
 C26 N3 C27 C28 -167.5(7) . . . . ?
 C27 N3 C26 C25 -175.6(7) . . . . ?
 C27 C28 C31 N4 79.2(8) . . . . ?
 C29 C28 C31 N4 -48.4(8) . . . . ?
 C30 C28 C31 N4 -166.1(6) . . . . ?
 C31 N4 C32 C38 178.2(6) . . . . ?
 C32 N4 C31 C28 128.3(6) . . . . ?
 C33 C34 C35 C36 1.8(10) . . . . ?
 C34 C33 C38 C32 -178.1(6) . . . . ?
 C34 C33 C38 C37 -1.5(9) . . . . ?
 C34 C35 C36 C37 -1.3(10) . . . . ?
 C35 C36 C37 C38 -0.6(10) . . . . ?
 C36 C37 C38 C32 178.6(6) . . . . ?
 C36 C37 C38 C33 2.0(10) . . . . ?
 C38 C33 C34 O8 179.6(6) . . . . ?
 C38 C33 C34 C35 -0.3(10) . . . . ?
 Ho2 O9 C39 C40 -4.9(8) . . . . ?
 Ho2 O9 C39 C44 177.0(5) . . . . ?
 Ho2 O10 C52 C53 5.4(8) . . . . ?
 Ho2 O10 C52 C57 -174.4(5) . . . . ?
 Ho2 O11 C40 C39 5.7(8) . . . . ?
 Ho2 O11 C40 C41 -175.3(6) . . . . ?
 Ho2 O12 C53 C52 -5.3(8) . . . . ?
 Ho2 O12 C53 C54 174.5(5) . . . . ?
 Ho2 O13 C58 C59 11.4(9) . . . . ?
 Ho2 O13 C58 C63 -168.7(5) . . . . ?
 Ho2 O14 C71 C72 5.0(9) . . . . ?
 Ho2 O14 C71 C76 -174.0(5) . . . . ?
 Ho2 O15 C59 C58 -9.0(8) . . . . ?
 Ho2 O15 C59 C60 171.7(6) . . . . ?
 Ho2 O16 C72 C71 -2.6(8) . . . . ?
 Ho2 O16 C72 C73 178.8(5) . . . . ?
 Cu3 O9 C39 C40 173.0(5) . . . . ?
 Cu3 O9 C39 C44 -5.1(9) . . . . ?
 Cu3 O10 C52 C53 -166.4(5) . . . . ?
 Cu3 O10 C52 C57 13.8(10) . . . . ?
 Cu3 N5 C45 C44 2.8(12) . . . . ?
 Cu3 N5 C46 C47 35.0(10) . . . . ?
 Cu3 N6 C50 C47 -45.5(8) . . . . ?
 Cu3 N6 C51 C57 -1.3(11) . . . . ?
 Cu4 O13 C58 C59 160.1(5) . . . . ?
 Cu4 O13 C58 C63 -19.9(9) . . . . ?
 Cu4 O14 C71 C72 -170.6(5) . . . . ?
 Cu4 O14 C71 C76 10.4(10) . . . . ?
 Cu4 N7 C64 C63 7.8(13) . . . . ?
 Cu4 N7 C65 C66 43.3(13) . . . . ?
 Cu4 N8 C69 C66 -46.2(9) . . . . ?
 Cu4 N8 C70 C76 -6.2(11) . . . . ?
 O9 C39 C40 O11 -0.7(9) . . . . ?
 O9 C39 C40 C41 -179.8(6) . . . . ?
 O9 C39 C44 C43 -178.5(6) . . . . ?
 O9 C39 C44 C45 -0.4(11) . . . . ?
 O10 C52 C53 O12 0.2(9) . . . . ?
 O10 C52 C53 C54 -179.6(6) . . . . ?
 O10 C52 C57 C51 -2.1(11) . . . . ?
 O10 C52 C57 C56 179.2(6) . . . . ?
 O11 C40 C41 C42 180.0(7) . . . . ?
 O12 C53 C54 C55 -178.9(6) . . . . ?
 O13 C58 C59 O15 -1.0(9) . . . . ?
 O13 C58 C59 C60 178.3(7) . . . . ?
 O13 C58 C63 C62 -179.2(7) . . . . ?
 O13 C58 C63 C64 -6.8(12) . . . . ?
 O14 C71 C72 O16 -1.3(9) . . . . ?
 O14 C71 C72 C73 177.4(6) . . . . ?
 O14 C71 C76 C70 5.1(12) . . . . ?
 O14 C71 C76 C75 179.9(7) . . . . ?
 O15 C59 C60 C61 -178.5(8) . . . . ?
 O16 C72 C73 C74 -177.8(7) . . . . ?
 N5 C46 C47 C48 59.4(9) . . . . ?
 N5 C46 C47 C49 178.7(7) . . . . ?
 N5 C46 C47 C50 -65.0(9) . . . . ?
 N6 C51 C57 C52 -4.5(12) . . . . ?
 N6 C51 C57 C56 174.2(7) . . . . ?
 N7 C65 C66 C67 57.6(12) . . . . ?
 N7 C65 C66 C68 179.7(9) . . . . ?
 N7 C65 C66 C69 -66.8(12) . . . . ?
 N8 C70 C76 C71 -7.2(13) . . . . ?
 N8 C70 C76 C75 177.8(8) . . . . ?
 C39 C40 C41 C42 -1.1(11) . . . . ?
 C39 C44 C45 N5 1.5(13) . . . . ?
 C40 C39 C44 C43 3.4(10) . . . . ?
 C40 C39 C44 C45 -178.5(7) . . . . ?
 C40 C41 C42 C43 1.8(12) . . . . ?
 C41 C42 C43 C44 0.1(12) . . . . ?
 C42 C43 C44 C39 -2.8(11) . . . . ?
 C42 C43 C44 C45 179.1(7) . . . . ?
 C43 C44 C45 N5 179.6(7) . . . . ?
 C44 C39 C40 O11 177.5(6) . . . . ?
 C44 C39 C40 C41 -1.6(11) . . . . ?
 C45 N5 C46 C47 -146.4(7) . . . . ?
 C46 N5 C45 C44 -175.7(7) . . . . ?
 C46 C47 C50 N6 70.2(9) . . . . ?
 C48 C47 C50 N6 -53.9(9) . . . . ?
 C49 C47 C50 N6 -173.4(7) . . . . ?
 C50 N6 C51 C57 176.1(7) . . . . ?
 C51 N6 C50 C47 136.9(7) . . . . ?
 C52 C53 C54 C55 0.9(10) . . . . ?
 C53 C52 C57 C51 178.2(6) . . . . ?
 C53 C52 C57 C56 -0.5(10) . . . . ?
 C53 C54 C55 C56 -1.5(11) . . . . ?
 C54 C55 C56 C57 1.2(11) . . . . ?
 C55 C56 C57 C51 -178.9(7) . . . . ?
 C55 C56 C57 C52 -0.2(11) . . . . ?
 C57 C52 C53 O12 179.9(6) . . . . ?
 C57 C52 C53 C54 0.1(10) . . . . ?
 C58 C59 C60 C61 2.3(12) . . . . ?
 C58 C63 C64 N7 13.6(14) . . . . ?
 C59 C58 C63 C62 0.8(11) . . . . ?
 C59 C58 C63 C64 173.1(7) . . . . ?
 C59 C60 C61 C62 -2.0(13) . . . . ?
 C60 C61 C62 C63 1.1(13) . . . . ?
 C61 C62 C63 C58 -0.5(12) . . . . ?
 C61 C62 C63 C64 -173.3(8) . . . . ?
 C62 C63 C64 N7 -173.9(8) . . . . ?
 C63 C58 C59 O15 179.0(6) . . . . ?
 C63 C58 C59 C60 -1.7(11) . . . . ?
 C64 N7 C65 C66 -134.5(9) . . . . ?
 C65 N7 C64 C63 -174.4(9) . . . . ?
 C65 C66 C69 N8 68.1(10) . . . . ?
 C67 C66 C69 N8 -56.5(10) . . . . ?
 C68 C66 C69 N8 -176.1(8) . . . . ?
 C69 N8 C70 C76 173.5(7) . . . . ?
 C70 N8 C69 C66 134.1(8) . . . . ?
 C71 C72 C73 C74 3.6(11) . . . . ?
 C72 C71 C76 C70 -173.9(7) . . . . ?
 C72 C71 C76 C75 0.9(11) . . . . ?
 C72 C73 C74 C75 -1.0(12) . . . . ?
 C73 C74 C75 C76 -1.6(12) . . . . ?
 C74 C75 C76 C70 176.7(7) . . . . ?
 C74 C75 C76 C71 1.6(12) . . . . ?
 C76 C71 C72 O16 177.8(6) . . . . ?
 C76 C71 C72 C73 -3.5(11) . . . . ?

_shelx_SHELXL_version_number      '2014/7'
_olex2_submission_special_instructions 'No special instructions were received'
