# Supplementary material
Source: MDPI journal article supplement (https://www.mdpi.com/2073-8994/11/4/460)
Supplement: s1 [file s1 › 3-CuEr.cif]

data_3-CuEr

_chemical_name_common             ?
_chemical_name_systematic         ?
_chemical_formula_moiety
;
 2(C38 H42 Cu2 Er N4 O9), 
2(C38 H40 Cu2 Er N5 O11),
10(N O3), 4(C H4 O), 2(H2 O)
;
_chemical_formula_sum             'C156 H184 Cu8 Er4 N28 O76'
_chemical_formula_weight          4844.66
_chemical_absolute_configuration  ?
_chemical_melting_point           ?
loop_
  _atom_type_symbol
  _atom_type_description
  _atom_type_scat_dispersion_real
  _atom_type_scat_dispersion_imag
  _atom_type_scat_source
 'C' 'C' 0.0181 0.0091 'International Tables Vol C Tables 4.2.6.8 and 6.1.1.4'
 'H' 'H' 0.0000 0.0000 'International Tables Vol C Tables 4.2.6.8 and 6.1.1.4'
 'Cu' 'Cu' -1.9646 0.5888
 'International Tables Vol C Tables 4.2.6.8 and 6.1.1.4'
 'Er' 'Er' -9.4367 3.9380
 'International Tables Vol C Tables 4.2.6.8 and 6.1.1.4'
 'N' 'N' 0.0311 0.0180 'International Tables Vol C Tables 4.2.6.8 and 6.1.1.4'
 'O' 'O' 0.0492 0.0322 'International Tables Vol C Tables 4.2.6.8 and 6.1.1.4'

_shelx_space_group_comment
;
The symmetry employed for this shelxl refinement is uniquely defined
by the following loop, which should always be used as a source of
symmetry information in preference to the above space-group names.
They are only intended as comments.
;
_space_group_crystal_system       'orthorhombic'
_space_group_IT_number            30
_space_group_name_H-M_alt         'P n c 2'
_space_group_name_Hall            'P 2 -2bc'
loop_
  _space_group_symop_operation_xyz
 'x, y, z'
 '-x, -y, z'
 'x, -y+1/2, z+1/2'
 '-x, y+1/2, z+1/2'

_cell_length_a                    16.8980(4)
_cell_length_b                    33.1478(7)
_cell_length_c                    15.5493(3)
_cell_angle_alpha                 90
_cell_angle_beta                  90
_cell_angle_gamma                 90
_cell_volume                      8709.6(3)
_cell_formula_units_Z             2
_cell_measurement_reflns_used     25479
_cell_measurement_temperature     120.00(10)
_cell_measurement_theta_max       76.1410
_cell_measurement_theta_min       3.6870
_shelx_estimated_absorpt_T_max    ?
_shelx_estimated_absorpt_T_min    ?
_exptl_absorpt_coefficient_mu     5.342
_exptl_absorpt_correction_T_max   1.00000
_exptl_absorpt_correction_T_min   0.53172
_exptl_absorpt_correction_type    multi-scan
_exptl_absorpt_process_details
;
CrysAlisPro 1.171.38.46 (Rigaku Oxford Diffraction, 2015)
Empirical absorption correction using spherical harmonics,
 implemented in SCALE3 ABSPACK scaling algorithm.
;
_exptl_absorpt_special_details    ?
_exptl_crystal_colour             green
_exptl_crystal_density_diffrn     1.847
_exptl_crystal_density_meas       ?
_exptl_crystal_density_method     ?
_exptl_crystal_description        needle
_exptl_crystal_F_000              4856
_exptl_crystal_size_max           0.25
_exptl_crystal_size_mid           0.08
_exptl_crystal_size_min           0.02
_exptl_transmission_factor_max    ?
_exptl_transmission_factor_min    ?
_diffrn_reflns_av_R_equivalents   0.0537
_diffrn_reflns_av_unetI/netI      0.0509
_diffrn_reflns_Laue_measured_fraction_full 1.000
_diffrn_reflns_Laue_measured_fraction_max 0.989
_diffrn_reflns_limit_h_max        18
_diffrn_reflns_limit_h_min        -21
_diffrn_reflns_limit_k_max        41
_diffrn_reflns_limit_k_min        -30
_diffrn_reflns_limit_l_max        18
_diffrn_reflns_limit_l_min        -19
_diffrn_reflns_number             65209
_diffrn_reflns_point_group_measured_fraction_full 1.000
_diffrn_reflns_point_group_measured_fraction_max 0.989
_diffrn_reflns_theta_full         67.684
_diffrn_reflns_theta_max          76.573
_diffrn_reflns_theta_min          3.736
_diffrn_ambient_environment       N~2~
_diffrn_ambient_temperature       120.00(10)
_diffrn_detector                  'CCD plate'
_diffrn_detector_area_resol_mean  5.2763
_diffrn_detector_type             AtlasS2
_diffrn_measured_fraction_theta_full 1.000
_diffrn_measured_fraction_theta_max 0.989
_diffrn_measurement_details
;
;
_diffrn_measurement_device        'four-circle diffractometer'
_diffrn_measurement_device_type   'SuperNova, Single source at offset, AtlasS2'
_diffrn_measurement_method        '\w scans'
_diffrn_orient_matrix_type
'CrysAlisPro convention (1999,Acta A55,543-557)'
_diffrn_orient_matrix_UB_11       -0.0632840000
_diffrn_orient_matrix_UB_12       -0.0221864000
_diffrn_orient_matrix_UB_13       -0.0535301000
_diffrn_orient_matrix_UB_21       -0.0564151000
_diffrn_orient_matrix_UB_22       0.0005037000
_diffrn_orient_matrix_UB_23       0.0778658000
_diffrn_orient_matrix_UB_31       -0.0335781000
_diffrn_orient_matrix_UB_32       0.0408223000
_diffrn_orient_matrix_UB_33       -0.0299705000
_diffrn_radiation_monochromator   mirror
_diffrn_radiation_probe           x-ray
_diffrn_radiation_type            CuK\a
_diffrn_radiation_wavelength      1.54184
_diffrn_source                    'micro-focus sealed X-ray tube'
_diffrn_source_type               'SuperNova (Cu) X-ray Source'
_reflns_Friedel_coverage          0.926
_reflns_Friedel_fraction_full     1.000
_reflns_Friedel_fraction_max      0.990
_reflns_number_gt                 15701
_reflns_number_total              17487
_reflns_odcompleteness_completeness 99.93
_reflns_odcompleteness_iscentric  1
_reflns_odcompleteness_theta      69.01
_reflns_special_details
;
 Reflections were merged by SHELXL according to the crystal
 class for the calculation of statistics and refinement.
 
 _reflns_Friedel_fraction is defined as the number of unique
 Friedel pairs measured divided by the number that would be
 possible theoretically, ignoring centric projections and
 systematic absences.
;
_reflns_threshold_expression      'I > 2\s(I)'
_computing_cell_refinement        'CrysAlisPro 1.171.38.46 (Rigaku OD, 2015)'
_computing_data_collection        'CrysAlisPro 1.171.38.46 (Rigaku OD, 2015)'
_computing_data_reduction         'CrysAlisPro 1.171.38.46 (Rigaku OD, 2015)'
_computing_molecular_graphics     'Olex2 (Dolomanov et al., 2009)'
_computing_publication_material   'Olex2 (Dolomanov et al., 2009)'
_computing_structure_refinement   'ShelXL (Sheldrick, 2008)'
_computing_structure_solution     'ShelXS (Sheldrick, 2008)'
_refine_diff_density_max          1.118
_refine_diff_density_min          -1.318
_refine_diff_density_rms          0.114
_refine_ls_abs_structure_details
;
 Flack x determined using 6457 quotients [(I+)-(I-)]/[(I+)+(I-)]
 (Parsons, Flack and Wagner, Acta Cryst. B69 (2013) 249-259).
;
_refine_ls_abs_structure_Flack    0.001(5)
_refine_ls_extinction_coef        .
_refine_ls_extinction_method      none
_refine_ls_goodness_of_fit_ref    1.033
_refine_ls_hydrogen_treatment     mixed
_refine_ls_matrix_type            full
_refine_ls_number_parameters      1220
_refine_ls_number_reflns          17487
_refine_ls_number_restraints      37
_refine_ls_R_factor_all           0.0529
_refine_ls_R_factor_gt            0.0425
_refine_ls_restrained_S_all       1.045
_refine_ls_shift/su_max           0.050
_refine_ls_shift/su_mean          0.002
_refine_ls_structure_factor_coef  Fsqd
_refine_ls_weighting_details
'w=1/[\s^2^(Fo^2^)+(0.0627P)^2^+3.6411P] where P=(Fo^2^+2Fc^2^)/3'
_refine_ls_weighting_scheme       calc
_refine_ls_wR_factor_gt           0.1076
_refine_ls_wR_factor_ref          0.1333
_refine_special_details
;
 Refined as a 2-component twin.
;
_olex2_refinement_description
;
1. Others
 Fixed Sof: C8(0.6) H8A(0.6) H8B(0.6) C8A(0.4) H8AA(0.4) H8AB(0.4) C10(0.6)
 H10A(0.6) H10B(0.6) H10C(0.6) C10A(0.4) H10D(0.4) H10E(0.4) H10F(0.4) C11(0.6)
 H11A(0.6) H11B(0.6) H11C(0.6) C11A(0.4) H11D(0.4) H11E(0.4) H11F(0.4) C12(0.6)
 H12A(0.6) H12B(0.6) C12A(0.4) H12C(0.4) H12D(0.4)
 Fixed U13: O28(0) N12(0) O29(0) N13(0)
 Fixed U23: O28(0) N12(0) O29(0) N13(0)
 Fixed Uiso: H3(0.035) H8(0.036) H17A(0.058) H17B(0.058) H3A(0.036) H4A(0.045)
 H5(0.041) H7A(0.042) H8A(0.036) H8B(0.036) H8AA(0.064) H8AB(0.064) H10A(0.061)
 H10B(0.061) H10C(0.061) H10D(0.082) H10E(0.082) H10F(0.082) H11A(0.035)
 H11B(0.035) H11C(0.035) H11D(0.072) H11E(0.072) H11F(0.072) H12A(0.033)
 H12B(0.033) H12C(0.054) H12D(0.054) H13(0.053) H16(0.03) H17(0.034) H18(0.032)
 H22(0.034) H23(0.038) H24(0.033) H26(0.029) H27A(0.04) H27B(0.04) H29A(0.047)
 H29B(0.047) H29C(0.047) H30A(0.055) H30B(0.055) H30C(0.055) H31A(0.033)
 H31B(0.033) H32(0.033) H35(0.029) H36(0.038) H37(0.035) H11(0.038) H12(0.038)
 H41(0.032) H42(0.033) H43(0.031) H45(0.031) H46A(0.037) H46B(0.037)
 H48A(0.059) H48B(0.059) H48C(0.059) H49A(0.056) H49B(0.056) H49C(0.056)
 H50A(0.035) H50B(0.035) H51(0.033) H54(0.033) H55(0.036) H56(0.035) H60(0.033)
 H61(0.035) H62(0.036) H64(0.033) H65A(0.036) H65B(0.036) H67A(0.052)
 H67B(0.052) H67C(0.052) H68A(0.058) H68B(0.058) H68C(0.058) H69A(0.035)
 H69B(0.035) H70(0.029) H73(0.036) H74(0.043) H75(0.033) H37A(0.054)
 H77A(0.056) H77B(0.056) H77C(0.056) H38(0.054) H78A(0.053) H78B(0.053)
 H78C(0.053) H39A(0.89) H39B(0.89)
 Fixed X: H17A(0.3733) H17B(0.3458) H3A(0.763) H4A(0.7688) H5(0.67)
 H7A(0.5498) H8A(0.4346) H8B(0.3768) H8AA(0.4713) H8AB(0.4527) H10A(0.4378)
 H10B(0.4191) H10C(0.3578) H10D(0.2586) H10E(0.3424) H10F(0.3104) H11A(0.2778)
 H11B(0.3397) H11C(0.2658) H11D(0.3472) H11E(0.3556) H11F(0.2726) H12A(0.2506)
 H12B(0.2703) H12C(0.2845) H12D(0.3776) H13(0.2411) H16(0.2945) H17(0.188)
 H18(0.1887) H22(0.3707) H23(0.3627) H24(0.4281) H26(0.5158) H27A(0.6536)
 H27B(0.5698) H29A(0.5886) H29B(0.5335) H29C(0.5351) H30A(0.7215) H30B(0.6423)
 H30C(0.7028) H31A(0.7235) H31B(0.7328) H32(0.6966) H35(0.5897) H36(0.6511)
 H37(0.6825) H41(0.26) H42(0.2846) H43(0.2058) H45(0.1074) H46A(0.0349)
 H46B(0.0327) H48A(-0.1765) H48B(-0.0979) H48C(-0.114) H49A(-0.0662) H49B(-
 0.0613) H49C(-0.145) H50A(-0.1674) H50B(-0.0818) H51(-0.2172) H54(-0.2388)
 H55(-0.3295) H56(-0.3014) H60(-0.1246) H61(-0.1325) H62(-0.0778) H64(-0.0003)
 H65A(0.0283) H65B(0.1097) H67A(0.2203) H67B(0.2269) H67C(0.1862) H68A(0.0773)
 H68B(0.1542) H68C(0.162) H69A(0.0829) H69B(0.008) H70(0.0917) H73(0.1003)
 H74(0.1181) H75(0.1097) O28(0) N12(0) O29(0.5) N13(0.5) H37A(0.4354)
 H77A(0.4076) H77B(0.371) H77C(0.3337) H38(0.2109) H78A(0.2489) H78B(0.2631)
 H78C(0.1749) H39A(0.7443) H39B(0.8098)
 Fixed Y: H17A(0.6746) H17B(0.665) H3A(0.6843) H4A(0.6822) H5(0.6512)
 H7A(0.6173) H8A(0.5958) H8B(0.6245) H8AA(0.5462) H8AB(0.5823) H10A(0.5211)
 H10B(0.5281) H10C(0.5038) H10D(0.6039) H10E(0.6254) H10F(0.6177) H11A(0.5841)
 H11B(0.551) H11C(0.5377) H11D(0.5563) H11E(0.5149) H11F(0.5381) H12A(0.554)
 H12B(0.6011) H12C(0.5264) H12D(0.5199) H13(0.5458) H16(0.5897) H17(0.5544)
 H18(0.5396) H22(0.7562) H23(0.8109) H24(0.8087) H26(0.7768) H27A(0.7543)
 H27B(0.7535) H29A(0.6542) H29B(0.6934) H29C(0.6662) H30A(0.7393) H30B(0.7375)
 H30C(0.7003) H31A(0.6596) H31B(0.6935) H32(0.6029) H35(0.4932) H36(0.4802)
 H37(0.5335) H41(0.6972) H42(0.7079) H43(0.6784) H45(0.6291) H46A(0.5491)
 H46B(0.5889) H48A(0.6058) H48B(0.6266) H48C(0.6254) H49A(0.5204) H49B(0.5622)
 H49C(0.5458) H50A(0.5361) H50B(0.518) H51(0.5374) H54(0.5786) H55(0.5458)
 H56(0.5342) H60(0.75) H61(0.8063) H62(0.8047) H64(0.7731) H65A(0.741)
 H65B(0.7534) H67A(0.6672) H67B(0.7129) H67C(0.6795) H68A(0.7174) H68B(0.741)
 H68C(0.6959) H69A(0.6434) H69B(0.6678) H70(0.5885) H73(0.4865) H74(0.4707)
 H75(0.5208) O28(0.5) N12(0.5) O29(0.5) N13(0.5) H37A(0.6247) H77A(0.6901)
 H77B(0.6936) H77C(0.6627) H38(0.6644) H78A(0.7346) H78B(0.7267) H78C(0.7287)
 H39A(0.7344) H39B(0.7539)
 Fixed Z: H17A(0.5747) H17B(0.6533) H3A(0.5829) H4A(0.7346) H5(0.8109)
 H7A(0.8216) H8A(0.8639) H8B(0.8102) H8AA(0.7993) H8AB(0.8652) H10A(0.8142)
 H10B(0.7144) H10C(0.7733) H10D(0.7704) H10E(0.756) H10F(0.8515) H11A(0.8887)
 H11B(0.9216) H11C(0.8638) H11D(0.9261) H11E(0.8739) H11F(0.876) H12A(0.7246)
 H12B(0.7318) H12C(0.7255) H12D(0.7091) H13(0.5924) H16(0.2466) H17(0.3088)
 H18(0.4549) H22(0.497) H23(0.3995) H24(0.2691) H26(0.1709) H27A(0.1065)
 H27B(0.0595) H29A(-0.0336) H29B(-0.0377) H29C(0.0473) H30A(-0.0182) H30B(-
 0.0744) H30C(-0.0754) H31A(0.0412) H31B(0.1137) H32(0.0888) H35(0.3421)
 H36(0.2106) H37(0.1187) H41(0.4699) H42(0.3228) H43(0.22) H45(0.1802)
 H46A(0.1782) H46B(0.1202) H48A(0.1419) H48B(0.1055) H48C(0.2069) H49A(0.0774)
 H49B(0.0263) H49C(0.0593) H50A(0.21) H50B(0.2303) H51(0.3314) H54(0.6832)
 H55(0.5963) H56(0.4514) H60(0.4699) H61(0.5598) H62(0.6953) H64(0.8028)
 H65A(0.9328) H65B(0.8881) H67A(0.9395) H67B(0.9069) H67C(0.8472) H68A(1.0684)
 H68B(1.0355) H68C(1.0713) H69A(1.005) H69B(0.969) H70(0.9435) H73(0.6496)
 H74(0.7949) H75(0.9002) H37A(0.1428) H77A(0.1004) H77B(0.195) H77C(0.1273)
 H38(0.7065) H78A(0.6323) H78B(0.7326) H78C(0.6954) H39A(0.284) H39B(0.3236)
;
_atom_sites_solution_hydrogens    mixed
_atom_sites_solution_primary      direct
_atom_sites_solution_secondary    ?
loop_
  _atom_site_label
  _atom_site_type_symbol
  _atom_site_fract_x
  _atom_site_fract_y
  _atom_site_fract_z
  _atom_site_U_iso_or_equiv
  _atom_site_adp_type
  _atom_site_occupancy
  _atom_site_site_symmetry_order
  _atom_site_calc_flag
  _atom_site_refinement_flags_posn
  _atom_site_refinement_flags_adp
  _atom_site_refinement_flags_occupancy
  _atom_site_disorder_assembly
  _atom_site_disorder_group
 Er1 Er 0.52081(3) 0.63636(2) 0.42947(3) 0.02181(13) Uani 1 1 d D . . . .
 Cu1 Cu 0.43400(11) 0.60206(6) 0.61599(10) 0.0362(4) Uani 1 1 d . . . . .
 Cu2 Cu 0.58973(9) 0.67343(4) 0.23444(10) 0.0242(3) Uani 1 1 d . . . . .
 O1 O 0.5351(4) 0.6231(2) 0.5736(5) 0.0247(14) Uani 1 1 d . . . . .
 O2 O 0.4189(4) 0.6021(2) 0.4924(4) 0.0222(14) Uani 1 1 d . . . . .
 O3 O 0.6457(4) 0.6565(2) 0.4852(4) 0.0231(14) Uani 1 1 d D . . . .
 H3 H 0.684(3) 0.669(3) 0.462(2) 0.035 Uiso 1 1 d DR . . . .
 O4 O 0.4185(4) 0.6200(2) 0.3319(4) 0.0262(15) Uani 1 1 d D . . . .
 H4 H 0.412(5) 0.626(5) 0.279(3) 0.07(6) Uiso 1 1 d D . . . .
 O5 O 0.5351(5) 0.68945(18) 0.3358(5) 0.0243(15) Uani 1 1 d . . . . .
 O6 O 0.5914(4) 0.6241(2) 0.3039(4) 0.0225(14) Uani 1 1 d . . . . .
 O7 O 0.4569(5) 0.6911(2) 0.4797(5) 0.0279(15) Uani 1 1 d D . . . .
 H7 H 0.452(5) 0.6957(16) 0.530(6) 0.2(2) Uiso 1 1 d D . . . .
 O8 O 0.5538(5) 0.56636(19) 0.4069(4) 0.0241(14) Uani 1 1 d D . . . .
 H8 H 0.544(7) 0.5454(8) 0.436(4) 0.036 Uiso 1 1 d DR . . . .
 O17 O 0.3878(5) 0.6670(3) 0.6248(5) 0.0385(19) Uani 1 1 d . . . . .
 H17A H 0.3733 0.6746 0.5747 0.058 Uiso 1 1 d GR . . . .
 H17B H 0.3458 0.6650 0.6533 0.058 Uiso 1 1 d GR . . . .
 N1 N 0.4714(7) 0.6036(4) 0.7377(7) 0.049(3) Uani 1 1 d . . . . .
 N2 N 0.3321(8) 0.5729(5) 0.6340(7) 0.068(4) Uani 1 1 d . . . . .
 N3 N 0.5691(5) 0.7257(3) 0.1749(6) 0.0268(18) Uani 1 1 d . . . . .
 N4 N 0.6563(5) 0.6493(3) 0.1461(5) 0.0237(17) Uani 1 1 d . . . . .
 C1 C 0.5963(6) 0.6379(3) 0.6188(7) 0.0214(19) Uani 1 1 d . . . . .
 C2 C 0.6565(6) 0.6559(3) 0.5735(6) 0.0224(18) Uani 1 1 d D . . . .
 C3 C 0.7214(6) 0.6722(3) 0.6149(7) 0.030(2) Uani 1 1 d . . . . .
 H3A H 0.7630 0.6843 0.5829 0.036 Uiso 1 1 calc R . . . .
 C4 C 0.7251(7) 0.6706(4) 0.7051(8) 0.038(3) Uani 1 1 d . . . . .
 H4A H 0.7688 0.6822 0.7346 0.045 Uiso 1 1 calc R . . . .
 C5 C 0.6663(7) 0.6526(4) 0.7500(7) 0.034(2) Uani 1 1 d . . . . .
 H5 H 0.6700 0.6512 0.8109 0.041 Uiso 1 1 calc R . . . .
 C6 C 0.5996(7) 0.6357(3) 0.7089(7) 0.029(2) Uani 1 1 d . . . . .
 C7 C 0.5391(8) 0.6182(4) 0.7617(7) 0.035(2) Uani 1 1 d . . . . .
 H7A H 0.5498 0.6173 0.8216 0.042 Uiso 1 1 calc R . . . .
 C8 C 0.4081(11) 0.5992(6) 0.8076(12) 0.030(4) Uiso 0.6 1 d . . . A 1
 H8A H 0.4346 0.5958 0.8639 0.036 Uiso 0.6 1 calc R . . A 1
 H8B H 0.3768 0.6245 0.8102 0.036 Uiso 0.6 1 calc R . . A 1
 C8A C 0.442(2) 0.5720(12) 0.807(3) 0.054(9) Uiso 0.4 1 d . . . A 2
 H8AA H 0.4713 0.5462 0.7993 0.064 Uiso 0.4 1 calc R . . A 2
 H8AB H 0.4527 0.5823 0.8652 0.064 Uiso 0.4 1 calc R . . A 2
 C9 C 0.3538(7) 0.5651(3) 0.7939(7) 0.032(2) Uiso 1 1 d . . . . .
 C10 C 0.3958(13) 0.5261(6) 0.7720(15) 0.041(4) Uiso 0.6 1 d . . . A 1
 H10A H 0.4378 0.5211 0.8142 0.061 Uiso 0.6 1 calc GR . . A 1
 H10B H 0.4191 0.5281 0.7144 0.061 Uiso 0.6 1 calc GR . . A 1
 H10C H 0.3578 0.5038 0.7733 0.061 Uiso 0.6 1 calc GR . . A 1
 C10A C 0.313(2) 0.6069(11) 0.793(3) 0.055(9) Uiso 0.4 1 d . . . A 2
 H10D H 0.2586 0.6039 0.7704 0.082 Uiso 0.4 1 calc GR . . A 2
 H10E H 0.3424 0.6254 0.7560 0.082 Uiso 0.4 1 calc GR . . A 2
 H10F H 0.3104 0.6177 0.8515 0.082 Uiso 0.4 1 calc GR . . A 2
 C11 C 0.3050(10) 0.5590(5) 0.8740(11) 0.023(3) Uiso 0.6 1 d . . . A 1
 H11A H 0.2778 0.5841 0.8887 0.035 Uiso 0.6 1 calc GR . . A 1
 H11B H 0.3397 0.5510 0.9216 0.035 Uiso 0.6 1 calc GR . . A 1
 H11C H 0.2658 0.5377 0.8638 0.035 Uiso 0.6 1 calc GR . . A 1
 C11A C 0.330(2) 0.5415(12) 0.875(2) 0.048(8) Uiso 0.4 1 d . . . A 2
 H11D H 0.3472 0.5563 0.9261 0.072 Uiso 0.4 1 calc GR . . A 2
 H11E H 0.3556 0.5149 0.8739 0.072 Uiso 0.4 1 calc GR . . A 2
 H11F H 0.2726 0.5381 0.8760 0.072 Uiso 0.4 1 calc GR . . A 2
 C12 C 0.2938(11) 0.5741(5) 0.7223(11) 0.028(4) Uiso 0.6 1 d . . . A 1
 H12A H 0.2506 0.5540 0.7246 0.033 Uiso 0.6 1 calc R . . A 1
 H12B H 0.2703 0.6011 0.7318 0.033 Uiso 0.6 1 calc R . . A 1
 C12A C 0.336(2) 0.5404(10) 0.718(2) 0.045(7) Uiso 0.4 1 d . . . A 2
 H12C H 0.2845 0.5264 0.7255 0.054 Uiso 0.4 1 calc R . . A 2
 H12D H 0.3776 0.5199 0.7091 0.054 Uiso 0.4 1 calc R . . A 2
 C13 C 0.2855(8) 0.5612(4) 0.5743(8) 0.044(3) Uani 1 1 d . . . . .
 H13 H 0.2411 0.5458 0.5924 0.053 Uiso 1 1 calc R . . . .
 C14 C 0.3560(6) 0.5894(3) 0.4474(6) 0.0217(19) Uani 1 1 d . . . . .
 C15 C 0.3555(6) 0.5979(3) 0.3589(6) 0.0236(19) Uani 1 1 d D . . . .
 C16 C 0.2939(6) 0.5845(3) 0.3067(7) 0.025(2) Uani 1 1 d . . . . .
 H16 H 0.2945 0.5897 0.2466 0.030 Uiso 1 1 calc R . . . .
 C17 C 0.2309(7) 0.5631(3) 0.3436(7) 0.028(2) Uani 1 1 d . . . . .
 H17 H 0.1880 0.5544 0.3088 0.034 Uiso 1 1 calc R . . . .
 C18 C 0.2309(6) 0.5548(3) 0.4307(8) 0.0264(19) Uani 1 1 d . . . . .
 H18 H 0.1887 0.5396 0.4549 0.032 Uiso 1 1 calc R . . . .
 C19 C 0.2916(6) 0.5683(3) 0.4832(7) 0.027(2) Uani 1 1 d . . . . .
 C20 C 0.4900(6) 0.7216(3) 0.3485(7) 0.0226(19) Uani 1 1 d . . . . .
 C21 C 0.4477(6) 0.7234(3) 0.4267(7) 0.0228(18) Uani 1 1 d D . . . .
 C22 C 0.4000(6) 0.7556(3) 0.4449(7) 0.029(2) Uani 1 1 d . . . . .
 H22 H 0.3707 0.7562 0.4970 0.034 Uiso 1 1 calc R . . . .
 C23 C 0.3944(7) 0.7881(3) 0.3855(8) 0.032(2) Uani 1 1 d . . . . .
 H23 H 0.3627 0.8109 0.3995 0.038 Uiso 1 1 calc R . . . .
 C24 C 0.4337(6) 0.7871(3) 0.3088(7) 0.028(2) Uani 1 1 d . . . . .
 H24 H 0.4281 0.8087 0.2691 0.033 Uiso 1 1 calc R . . . .
 C25 C 0.4829(6) 0.7537(3) 0.2884(7) 0.026(2) Uani 1 1 d . . . . .
 C26 C 0.5235(6) 0.7536(3) 0.2061(6) 0.024(2) Uani 1 1 d . . . . .
 H26 H 0.5158 0.7768 0.1709 0.029 Uiso 1 1 calc R . . . .
 C27 C 0.6075(8) 0.7370(3) 0.0930(7) 0.034(2) Uani 1 1 d . . . . .
 H27A H 0.6536 0.7543 0.1065 0.040 Uiso 1 1 calc R . . . .
 H27B H 0.5698 0.7535 0.0595 0.040 Uiso 1 1 calc R . . . .
 C28 C 0.6357(7) 0.7027(3) 0.0359(7) 0.031(2) Uani 1 1 d . . . . .
 C29 C 0.5669(7) 0.6767(3) -0.0004(7) 0.031(2) Uani 1 1 d . . . . .
 H29A H 0.5886 0.6542 -0.0336 0.047 Uiso 1 1 calc GR . . . .
 H29B H 0.5335 0.6934 -0.0377 0.047 Uiso 1 1 calc GR . . . .
 H29C H 0.5351 0.6662 0.0473 0.047 Uiso 1 1 calc GR . . . .
 C30 C 0.6795(7) 0.7217(4) -0.0398(7) 0.037(3) Uani 1 1 d . . . . .
 H30A H 0.7215 0.7393 -0.0182 0.055 Uiso 1 1 calc GR . . . .
 H30B H 0.6423 0.7375 -0.0744 0.055 Uiso 1 1 calc GR . . . .
 H30C H 0.7028 0.7003 -0.0754 0.055 Uiso 1 1 calc GR . . . .
 C31 C 0.6941(6) 0.6761(3) 0.0835(6) 0.027(2) Uani 1 1 d . . . . .
 H31A H 0.7235 0.6596 0.0412 0.033 Uiso 1 1 calc R . . . .
 H31B H 0.7328 0.6935 0.1137 0.033 Uiso 1 1 calc R . . . .
 C32 C 0.6680(6) 0.6111(3) 0.1384(7) 0.027(2) Uani 1 1 d . . . . .
 H32 H 0.6966 0.6029 0.0888 0.033 Uiso 1 1 calc R . . . .
 C33 C 0.6071(6) 0.5875(3) 0.2761(6) 0.0229(19) Uani 1 1 d . . . . .
 C34 C 0.5872(6) 0.5550(3) 0.3292(6) 0.0212(19) Uani 1 1 d D . . . .
 C35 C 0.6035(6) 0.5148(3) 0.3049(6) 0.024(2) Uani 1 1 d . . . . .
 H35 H 0.5897 0.4932 0.3421 0.029 Uiso 1 1 calc R . . . .
 C36 C 0.6394(7) 0.5071(3) 0.2271(7) 0.032(2) Uani 1 1 d . . . . .
 H36 H 0.6511 0.4802 0.2106 0.038 Uiso 1 1 calc R . . . .
 C37 C 0.6586(7) 0.5391(3) 0.1727(7) 0.029(2) Uani 1 1 d . . . . .
 H37 H 0.6825 0.5335 0.1187 0.035 Uiso 1 1 calc R . . . .
 C38 C 0.6435(5) 0.5792(3) 0.1951(6) 0.0193(17) Uani 1 1 d . . . . .
 Er2 Er 0.02354(3) 0.62703(2) 0.56240(3) 0.02125(13) Uani 1 1 d D . . . .
 Cu4 Cu -0.02501(9) 0.59248(4) 0.35815(9) 0.0226(3) Uani 1 1 d . . . . .
 Cu3 Cu 0.04120(9) 0.66333(4) 0.76940(9) 0.0221(3) Uani 1 1 d . . . . .
 O9 O 0.0103(4) 0.68032(19) 0.6561(4) 0.0235(14) Uani 1 1 d . . . . .
 O10 O 0.0633(4) 0.6148(2) 0.7023(4) 0.0221(14) Uani 1 1 d . . . . .
 O11 O -0.0493(5) 0.6811(2) 0.5044(4) 0.0253(15) Uani 1 1 d D . . . .
 H11 H -0.072(7) 0.6843(19) 0.456(3) 0.038 Uiso 1 1 d DR . . . .
 O12 O 0.0679(5) 0.5595(2) 0.5858(4) 0.0256(15) Uani 1 1 d D . . . .
 H12 H 0.057(5) 0.5382(7) 0.557(3) 0.038 Uiso 1 1 d DR . . . .
 O13 O 0.0549(4) 0.62146(19) 0.4199(5) 0.0230(14) Uani 1 1 d . . . . .
 O14 O -0.0654(4) 0.5927(2) 0.4761(4) 0.0233(14) Uani 1 1 d . . . . .
 O15 O 0.1404(5) 0.6563(2) 0.5360(5) 0.0267(15) Uani 1 1 d D . . . .
 H15 H 0.179(10) 0.664(8) 0.573(2) 0.4(3) Uiso 1 1 d D . . . .
 O16 O -0.0961(5) 0.6059(2) 0.6348(4) 0.0261(15) Uani 1 1 d D . . . .
 H16A H -0.111(3) 0.612(3) 0.686(2) 0.01(3) Uiso 1 1 d D . . . .
 O21 O -0.0978(6) 0.6648(4) 0.8114(9) 0.069(4) Uani 1 1 d . . . . .
 O22 O -0.1542(9) 0.6391(4) 0.9182(7) 0.079(4) Uani 1 1 d . . . . .
 O23 O -0.1383(7) 0.6038(3) 0.8038(7) 0.060(3) Uani 1 1 d . . . . .
 N5 N 0.0310(5) 0.6008(3) 0.2485(5) 0.0263(18) Uani 1 1 d . . . . .
 N6 N -0.1157(6) 0.5613(3) 0.3153(6) 0.0271(18) Uani 1 1 d . . . . .
 N7 N 0.0397(5) 0.7194(3) 0.8127(5) 0.0252(17) Uani 1 1 d . . . . .
 N8 N 0.0648(5) 0.6355(2) 0.8778(5) 0.0238(17) Uani 1 1 d . . . . .
 N10 N -0.1298(6) 0.6351(3) 0.8447(6) 0.031(2) Uani 1 1 d . . . . .
 C39 C 0.1140(6) 0.6442(3) 0.3897(6) 0.0200(18) Uani 1 1 d . . . . .
 C40 C 0.1626(6) 0.6626(3) 0.4540(6) 0.024(2) Uani 1 1 d D . . . .
 C41 C 0.2261(6) 0.6854(3) 0.4281(7) 0.0264(19) Uani 1 1 d . . . . .
 H41 H 0.2600 0.6972 0.4699 0.032 Uiso 1 1 calc R . . . .
 C42 C 0.2414(6) 0.6914(3) 0.3400(7) 0.027(2) Uani 1 1 d . . . . .
 H42 H 0.2846 0.7079 0.3228 0.033 Uiso 1 1 calc R . . . .
 C43 C 0.1947(6) 0.6738(3) 0.2791(7) 0.026(2) Uani 1 1 d . . . . .
 H43 H 0.2058 0.6784 0.2200 0.031 Uiso 1 1 calc R . . . .
 C44 C 0.1294(6) 0.6487(3) 0.3023(6) 0.0217(19) Uani 1 1 d . . . . .
 C45 C 0.0893(6) 0.6257(3) 0.2376(7) 0.026(2) Uani 1 1 d . . . . .
 H45 H 0.1074 0.6291 0.1802 0.031 Uiso 1 1 calc R . . . .
 C46 C 0.0100(7) 0.5760(3) 0.1721(7) 0.030(2) Uani 1 1 d . . . . .
 H46A H 0.0349 0.5491 0.1782 0.037 Uiso 1 1 calc R . . . .
 H46B H 0.0327 0.5889 0.1202 0.037 Uiso 1 1 calc R . . . .
 C47 C -0.0769(7) 0.5705(3) 0.1587(7) 0.029(2) Uani 1 1 d . . . . .
 C48 C -0.1202(8) 0.6107(4) 0.1527(8) 0.039(3) Uani 1 1 d . . . . .
 H48A H -0.1765 0.6058 0.1419 0.059 Uiso 1 1 calc GR . . . .
 H48B H -0.0979 0.6266 0.1055 0.059 Uiso 1 1 calc GR . . . .
 H48C H -0.1140 0.6254 0.2069 0.059 Uiso 1 1 calc GR . . . .
 C49 C -0.0884(8) 0.5476(4) 0.0725(7) 0.037(3) Uani 1 1 d . . . . .
 H49A H -0.0662 0.5204 0.0774 0.056 Uiso 1 1 calc GR . . . .
 H49B H -0.0613 0.5622 0.0263 0.056 Uiso 1 1 calc GR . . . .
 H49C H -0.1450 0.5458 0.0593 0.056 Uiso 1 1 calc GR . . . .
 C50 C -0.1129(7) 0.5433(3) 0.2276(7) 0.029(2) Uani 1 1 d . . . . .
 H50A H -0.1674 0.5361 0.2100 0.035 Uiso 1 1 calc R . . . .
 H50B H -0.0818 0.5180 0.2303 0.035 Uiso 1 1 calc R . . . .
 C51 C -0.1768(7) 0.5519(3) 0.3604(7) 0.028(2) Uani 1 1 d . . . . .
 H51 H -0.2172 0.5374 0.3314 0.033 Uiso 1 1 calc R . . . .
 C52 C -0.1359(6) 0.5802(3) 0.5035(6) 0.0216(19) Uani 1 1 d . . . . .
 C53 C -0.1536(6) 0.5868(3) 0.5890(6) 0.023(2) Uani 1 1 d D . . . .
 C54 C -0.2271(6) 0.5739(3) 0.6243(7) 0.028(2) Uani 1 1 d . . . . .
 H54 H -0.2388 0.5786 0.6832 0.033 Uiso 1 1 calc R . . . .
 C55 C -0.2806(6) 0.5546(3) 0.5729(8) 0.030(2) Uani 1 1 d . . . . .
 H55 H -0.3295 0.5458 0.5963 0.036 Uiso 1 1 calc R . . . .
 C56 C -0.2638(6) 0.5478(3) 0.4865(7) 0.029(2) Uani 1 1 d . . . . .
 H56 H -0.3014 0.5342 0.4514 0.035 Uiso 1 1 calc R . . . .
 C57 C -0.1913(6) 0.5609(3) 0.4505(6) 0.022(2) Uani 1 1 d . . . . .
 C58 C -0.0279(6) 0.7136(3) 0.6343(7) 0.025(2) Uani 1 1 d . . . . .
 C59 C -0.0613(5) 0.7155(3) 0.5530(7) 0.0211(18) Uani 1 1 d D . . . .
 C60 C -0.1010(6) 0.7494(3) 0.5253(7) 0.028(2) Uani 1 1 d . . . . .
 H60 H -0.1246 0.7500 0.4699 0.033 Uiso 1 1 calc R . . . .
 C61 C -0.1061(6) 0.7827(3) 0.5789(7) 0.029(2) Uani 1 1 d . . . . .
 H61 H -0.1325 0.8063 0.5598 0.035 Uiso 1 1 calc R . . . .
 C62 C -0.0735(7) 0.7816(3) 0.6594(7) 0.030(2) Uani 1 1 d . . . . .
 H62 H -0.0778 0.8047 0.6953 0.036 Uiso 1 1 calc R . . . .
 C63 C -0.0339(6) 0.7475(3) 0.6906(7) 0.024(2) Uani 1 1 d . . . . .
 C64 C 0.0027(6) 0.7481(3) 0.7729(7) 0.028(2) Uani 1 1 d . . . . .
 H64 H -0.0003 0.7731 0.8028 0.033 Uiso 1 1 calc R . . . .
 C65 C 0.0722(7) 0.7308(3) 0.8968(7) 0.030(2) Uani 1 1 d . . . . .
 H65A H 0.0283 0.7410 0.9328 0.036 Uiso 1 1 calc R . . . .
 H65B H 0.1097 0.7534 0.8881 0.036 Uiso 1 1 calc R . . . .
 C66 C 0.1147(6) 0.6978(3) 0.9469(6) 0.0229(19) Uani 1 1 d . . . . .
 C67 C 0.1940(7) 0.6885(4) 0.9066(8) 0.035(2) Uani 1 1 d . . . . .
 H67A H 0.2203 0.6672 0.9395 0.052 Uiso 1 1 calc GR . . . .
 H67B H 0.2269 0.7129 0.9069 0.052 Uiso 1 1 calc GR . . . .
 H67C H 0.1862 0.6795 0.8472 0.052 Uiso 1 1 calc GR . . . .
 C68 C 0.1283(8) 0.7146(4) 1.0390(7) 0.038(3) Uani 1 1 d . . . . .
 H68A H 0.0773 0.7174 1.0684 0.058 Uiso 1 1 calc GR . . . .
 H68B H 0.1542 0.7410 1.0355 0.058 Uiso 1 1 calc GR . . . .
 H68C H 0.1620 0.6959 1.0713 0.058 Uiso 1 1 calc GR . . . .
 C69 C 0.0632(7) 0.6598(3) 0.9562(7) 0.030(2) Uani 1 1 d . . . . .
 H69A H 0.0829 0.6434 1.0050 0.035 Uiso 1 1 calc R . . . .
 H69B H 0.0080 0.6678 0.9690 0.035 Uiso 1 1 calc R . . . .
 C70 C 0.0817(6) 0.5977(3) 0.8867(6) 0.024(2) Uani 1 1 d . . . . .
 H70 H 0.0917 0.5885 0.9435 0.029 Uiso 1 1 calc R . . . .
 C71 C 0.0763(6) 0.5779(3) 0.7307(7) 0.024(2) Uani 1 1 d . . . . .
 C72 C 0.0807(6) 0.5473(3) 0.6701(7) 0.024(2) Uani 1 1 d D . . . .
 C73 C 0.0968(6) 0.5069(3) 0.6925(8) 0.030(2) Uani 1 1 d . . . . .
 H73 H 0.1003 0.4865 0.6496 0.036 Uiso 1 1 calc R . . . .
 C74 C 0.1073(7) 0.4977(3) 0.7784(8) 0.035(2) Uani 1 1 d . . . . .
 H74 H 0.1181 0.4707 0.7949 0.043 Uiso 1 1 calc R . . . .
 C75 C 0.1025(7) 0.5276(3) 0.8414(7) 0.027(2) Uani 1 1 d . . . . .
 H75 H 0.1097 0.5208 0.9002 0.033 Uiso 1 1 calc R . . . .
 C76 C 0.0869(6) 0.5680(3) 0.8182(6) 0.025(2) Uani 1 1 d . . . . .
 O18 O 0.7697(6) 0.6659(5) 0.2939(7) 0.080(4) Uani 1 1 d . . . . .
 O19 O 0.7814(5) 0.6823(3) 0.4276(6) 0.049(2) Uani 1 1 d . . . . .
 O20 O 0.8870(5) 0.6713(3) 0.3537(5) 0.0388(19) Uani 1 1 d . . . . .
 N9 N 0.8124(6) 0.6728(4) 0.3572(6) 0.041(2) Uani 1 1 d . . . . .
 O24 O 0.2232(7) 0.6072(3) 0.0723(8) 0.060(3) Uani 1 1 d . . . . .
 O25 O 0.2831(6) 0.5492(3) 0.0855(6) 0.049(2) Uani 1 1 d . . . . .
 O26 O 0.1586(6) 0.5518(3) 0.0556(7) 0.058(3) Uani 1 1 d . . . . .
 N11 N 0.2213(6) 0.5691(3) 0.0716(6) 0.037(2) Uani 1 1 d . . . . .
 O27 O 0.0429(5) 0.5242(2) 0.3823(5) 0.0295(16) Uani 1 1 d . . . . .
 O28 O 0.0000 0.5000 0.5034(7) 0.035(3) Uani 1 2 d S T P . .
 N12 N 0.0000 0.5000 0.4207(8) 0.025(2) Uani 1 2 d S T P . .
 O29 O 0.5000 0.5000 0.4806(8) 0.042(3) Uani 1 2 d S T P . .
 O30 O 0.5252(5) 0.5308(3) 0.5996(5) 0.0379(19) Uani 1 1 d . . . . .
 N13 N 0.5000 0.5000 0.5625(9) 0.029(3) Uani 1 2 d S T P . .
 O37 O 0.4362(5) 0.6442(3) 0.1773(5) 0.0358(18) Uani 1 1 d . . . . .
 H37A H 0.4354 0.6247 0.1428 0.054 Uiso 1 1 calc GR . . . .
 C77 C 0.3828(7) 0.6751(4) 0.1476(8) 0.038(3) Uani 1 1 d . . . . .
 H77A H 0.4076 0.6901 0.1004 0.056 Uiso 1 1 calc GR . . . .
 H77B H 0.3710 0.6936 0.1950 0.056 Uiso 1 1 calc GR . . . .
 H77C H 0.3337 0.6627 0.1273 0.056 Uiso 1 1 calc GR . . . .
 O34 O 0.5506(6) 0.4105(3) 0.0611(7) 0.049(2) Uiso 1 1 d D . . . .
 N15 N 0.5277(9) 0.4427(4) 0.0574(13) 0.077(4) Uiso 1 1 d D . . . .
 O38 O 0.2312(5) 0.6785(2) 0.6678(5) 0.0358(18) Uani 1 1 d . . . . .
 H38 H 0.2109 0.6644 0.7065 0.054 Uiso 1 1 calc GR . . . .
 C78 C 0.2294(7) 0.7203(3) 0.6832(8) 0.035(2) Uani 1 1 d . . . . .
 H78A H 0.2489 0.7346 0.6323 0.053 Uiso 1 1 calc GR . . . .
 H78B H 0.2631 0.7267 0.7326 0.053 Uiso 1 1 calc GR . . . .
 H78C H 0.1749 0.7287 0.6954 0.053 Uiso 1 1 calc GR . . . .
 O32 O 0.7067(7) 0.5919(4) 0.9382(8) 0.066(3) Uiso 1 1 d D . . . .
 N14 N 0.7010(18) 0.5561(6) 0.9103(19) 0.136(9) Uiso 1 1 d D . . . .
 O35 O 0.544(9) 0.464(4) 0.113(4) 0.05(15) Uiso 1 1 d D . . . .
 O36 O 0.481(10) 0.454(4) 0.009(2) 0.05(17) Uiso 1 1 d D . . . .
 O33 O 0.760(4) 0.534(2) 0.912(7) 0.07(8) Uiso 1 1 d D . . . .
 O31 O 0.648(4) 0.546(2) 0.861(6) 0.07(8) Uiso 1 1 d D . . . .
 O39 O 0.776(4) 0.755(2) 0.281(4) 0.49(2) Uiso 1 1 d . . . . .
 H39A H 0.7443 0.7344 0.2840 0.890 Uiso 1 1 d G . . . .
 H39B H 0.8098 0.7539 0.3236 0.890 Uiso 1 1 d G . . . .

loop_
  _atom_site_aniso_label
  _atom_site_aniso_U_11
  _atom_site_aniso_U_22
  _atom_site_aniso_U_33
  _atom_site_aniso_U_23
  _atom_site_aniso_U_13
  _atom_site_aniso_U_12
 Er1 0.0274(3) 0.0207(2) 0.0174(3) -0.0010(2) 0.0005(2) -0.0031(2)
 Cu1 0.0424(10) 0.0503(10) 0.0160(7) -0.0015(7) 0.0006(7) -0.0232(8)
 Cu2 0.0316(8) 0.0214(7) 0.0196(7) 0.0006(5) 0.0017(6) -0.0022(6)
 O1 0.029(3) 0.028(3) 0.017(4) -0.006(3) -0.008(3) -0.004(3)
 O2 0.024(3) 0.024(3) 0.019(3) 0.002(3) 0.003(3) -0.010(3)
 O3 0.025(3) 0.021(3) 0.023(4) 0.004(3) -0.002(3) -0.004(3)
 O4 0.032(4) 0.030(4) 0.016(3) 0.004(3) -0.005(3) -0.007(3)
 O5 0.042(4) 0.006(3) 0.025(4) -0.002(2) 0.004(3) -0.004(3)
 O6 0.027(3) 0.020(3) 0.021(3) -0.006(3) 0.005(3) 0.002(3)
 O7 0.037(4) 0.022(3) 0.025(4) 0.001(3) 0.004(3) -0.001(3)
 O8 0.039(4) 0.015(3) 0.018(3) 0.000(2) 0.004(3) -0.003(3)
 O17 0.034(4) 0.053(5) 0.028(4) -0.009(4) 0.006(3) 0.000(4)
 N1 0.056(7) 0.071(8) 0.019(5) 0.004(5) 0.003(5) -0.035(6)
 N2 0.063(8) 0.118(12) 0.022(5) 0.000(6) -0.002(5) -0.055(8)
 N3 0.035(5) 0.023(4) 0.022(4) 0.002(3) 0.005(3) -0.005(3)
 N4 0.024(4) 0.024(4) 0.023(4) 0.003(3) 0.000(3) -0.002(3)
 C1 0.020(4) 0.019(4) 0.026(5) -0.008(4) -0.002(4) -0.002(3)
 C2 0.027(5) 0.025(4) 0.015(4) -0.004(4) 0.000(4) 0.002(4)
 C3 0.027(5) 0.034(6) 0.028(5) -0.005(5) -0.010(4) -0.003(4)
 C4 0.034(6) 0.041(6) 0.039(7) 0.003(5) -0.016(5) -0.002(5)
 C5 0.032(6) 0.049(7) 0.021(5) 0.002(5) -0.008(4) -0.001(5)
 C6 0.038(6) 0.028(5) 0.019(5) -0.001(4) -0.004(4) 0.003(4)
 C7 0.047(7) 0.039(6) 0.019(5) -0.004(5) -0.005(5) -0.008(5)
 C13 0.051(7) 0.055(7) 0.027(6) 0.006(5) 0.003(5) -0.033(6)
 C14 0.031(5) 0.019(4) 0.015(5) 0.000(3) -0.003(4) -0.004(4)
 C15 0.026(5) 0.023(5) 0.022(5) -0.001(4) -0.002(4) 0.000(4)
 C16 0.029(5) 0.025(5) 0.021(5) 0.001(4) -0.002(4) 0.003(4)
 C17 0.032(5) 0.027(5) 0.026(5) 0.003(4) -0.008(4) -0.006(4)
 C18 0.021(4) 0.025(4) 0.033(5) -0.002(4) -0.005(4) -0.003(3)
 C19 0.027(5) 0.025(5) 0.028(5) -0.003(4) 0.000(4) 0.001(4)
 C20 0.027(5) 0.018(4) 0.023(5) -0.003(4) -0.002(4) 0.000(4)
 C21 0.027(4) 0.015(4) 0.026(5) 0.002(4) -0.002(4) -0.005(3)
 C22 0.021(4) 0.027(5) 0.038(6) -0.003(4) 0.006(4) -0.007(4)
 C23 0.029(5) 0.025(5) 0.042(6) -0.004(4) -0.009(5) 0.000(4)
 C24 0.034(5) 0.018(5) 0.032(6) 0.002(4) -0.004(4) 0.001(4)
 C25 0.034(5) 0.016(4) 0.028(6) 0.000(4) -0.005(4) -0.008(4)
 C26 0.032(5) 0.023(5) 0.018(5) 0.000(4) -0.003(4) -0.001(4)
 C27 0.046(7) 0.028(5) 0.026(5) 0.000(4) 0.007(5) 0.000(5)
 C28 0.037(6) 0.033(5) 0.024(5) 0.002(4) 0.004(4) -0.008(4)
 C29 0.033(6) 0.033(6) 0.028(5) 0.005(4) -0.005(4) 0.002(4)
 C30 0.041(6) 0.042(6) 0.027(5) 0.003(5) 0.007(5) -0.006(5)
 C31 0.025(5) 0.041(6) 0.015(5) -0.001(4) 0.001(4) -0.006(4)
 C32 0.022(5) 0.039(6) 0.021(5) 0.003(4) -0.001(4) -0.001(4)
 C33 0.025(5) 0.022(4) 0.022(5) 0.002(4) 0.000(4) 0.003(4)
 C34 0.027(5) 0.022(5) 0.014(4) -0.001(3) -0.002(4) 0.006(4)
 C35 0.040(6) 0.010(4) 0.021(5) 0.000(3) 0.000(4) 0.007(4)
 C36 0.045(6) 0.020(5) 0.031(6) 0.005(4) -0.002(5) 0.011(4)
 C37 0.034(5) 0.034(5) 0.018(5) -0.007(4) 0.001(4) 0.006(4)
 C38 0.022(4) 0.021(4) 0.015(4) -0.001(3) 0.002(3) 0.003(3)
 Er2 0.0285(3) 0.0189(2) 0.0164(3) -0.0013(2) -0.0016(2) -0.0024(2)
 Cu4 0.0275(7) 0.0230(7) 0.0171(7) -0.0018(5) -0.0007(5) -0.0043(5)
 Cu3 0.0304(7) 0.0198(6) 0.0160(7) -0.0026(5) -0.0025(6) 0.0000(5)
 O9 0.037(4) 0.011(3) 0.022(3) 0.001(2) 0.003(3) 0.005(3)
 O10 0.035(4) 0.018(3) 0.013(3) -0.002(2) -0.002(3) 0.001(3)
 O11 0.036(4) 0.018(3) 0.021(4) -0.001(3) -0.008(3) 0.003(3)
 O12 0.039(4) 0.016(3) 0.021(4) -0.003(2) -0.005(3) 0.000(3)
 O13 0.031(4) 0.020(3) 0.017(3) -0.001(3) 0.006(3) -0.004(3)
 O14 0.022(3) 0.032(4) 0.017(3) -0.007(3) -0.007(3) -0.008(3)
 O15 0.032(4) 0.026(3) 0.022(4) 0.000(3) 0.005(3) -0.010(3)
 O16 0.033(4) 0.028(4) 0.017(3) -0.007(3) -0.001(3) -0.004(3)
 O21 0.041(6) 0.072(8) 0.092(10) 0.034(7) 0.001(6) -0.004(5)
 O22 0.102(10) 0.108(9) 0.028(5) -0.028(6) 0.009(6) 0.003(8)
 O23 0.076(7) 0.038(5) 0.067(7) -0.016(5) -0.020(6) -0.001(5)
 N5 0.032(5) 0.030(4) 0.018(4) 0.003(3) -0.005(3) -0.001(4)
 N6 0.038(5) 0.022(4) 0.022(4) -0.004(3) -0.001(4) -0.004(4)
 N7 0.026(4) 0.030(4) 0.019(4) -0.004(3) 0.001(3) 0.000(3)
 N8 0.032(5) 0.020(4) 0.019(4) 0.002(3) 0.004(3) -0.002(3)
 N10 0.041(5) 0.026(4) 0.026(5) 0.000(4) 0.001(4) -0.002(4)
 C39 0.028(5) 0.015(4) 0.016(4) 0.001(3) 0.005(4) -0.004(4)
 C40 0.027(5) 0.027(5) 0.018(5) 0.000(4) 0.001(4) -0.001(4)
 C41 0.031(5) 0.025(4) 0.024(5) 0.002(4) 0.001(4) -0.002(4)
 C42 0.032(5) 0.019(4) 0.031(6) 0.008(4) 0.004(4) -0.003(4)
 C43 0.034(5) 0.025(5) 0.020(5) 0.012(4) -0.001(4) -0.006(4)
 C44 0.018(4) 0.025(5) 0.022(5) 0.002(4) -0.001(4) 0.000(4)
 C45 0.030(5) 0.028(5) 0.020(5) 0.006(4) -0.004(4) -0.005(4)
 C46 0.040(6) 0.030(5) 0.021(5) -0.008(4) 0.000(4) -0.007(4)
 C47 0.039(6) 0.028(5) 0.019(5) -0.007(4) -0.002(4) -0.001(4)
 C48 0.053(7) 0.031(6) 0.035(6) 0.000(5) -0.012(6) 0.000(5)
 C49 0.052(7) 0.038(6) 0.022(5) -0.011(5) 0.000(5) -0.012(5)
 C50 0.039(6) 0.028(5) 0.020(5) -0.013(4) -0.002(4) -0.011(4)
 C51 0.035(5) 0.019(5) 0.028(5) -0.003(4) 0.000(4) -0.005(4)
 C52 0.027(5) 0.013(4) 0.024(5) 0.003(3) -0.001(4) -0.003(3)
 C53 0.024(5) 0.020(4) 0.026(5) 0.004(4) 0.006(4) 0.004(4)
 C54 0.025(5) 0.030(5) 0.028(5) 0.002(4) 0.005(4) 0.003(4)
 C55 0.024(5) 0.034(5) 0.032(6) -0.001(5) 0.005(4) 0.001(4)
 C56 0.025(5) 0.031(5) 0.032(6) 0.003(4) 0.002(4) -0.006(4)
 C57 0.021(4) 0.017(4) 0.029(5) -0.002(3) -0.006(4) 0.000(3)
 C58 0.018(4) 0.033(5) 0.025(5) -0.001(4) 0.001(4) 0.000(4)
 C59 0.021(4) 0.016(4) 0.026(5) -0.001(4) -0.006(4) -0.005(3)
 C60 0.023(5) 0.040(6) 0.020(5) 0.002(4) -0.003(4) 0.004(4)
 C61 0.030(5) 0.024(5) 0.032(6) 0.002(4) -0.006(4) 0.006(4)
 C62 0.037(6) 0.025(5) 0.027(5) -0.007(4) 0.008(4) 0.009(4)
 C63 0.034(5) 0.020(4) 0.018(5) -0.001(4) 0.001(4) -0.004(4)
 C64 0.027(5) 0.029(5) 0.027(5) -0.002(4) 0.000(4) 0.003(4)
 C65 0.033(6) 0.032(5) 0.026(5) -0.014(4) -0.006(4) 0.000(4)
 C66 0.029(5) 0.027(5) 0.013(4) -0.006(3) -0.001(3) -0.002(4)
 C67 0.031(6) 0.039(6) 0.034(6) -0.003(5) -0.001(4) -0.002(5)
 C68 0.049(7) 0.046(7) 0.020(5) -0.011(4) -0.013(5) 0.000(5)
 C69 0.035(6) 0.035(6) 0.020(5) -0.005(4) 0.006(4) -0.002(4)
 C70 0.027(5) 0.027(5) 0.020(5) 0.000(4) -0.001(4) 0.002(4)
 C71 0.029(5) 0.024(5) 0.020(5) 0.002(4) -0.008(4) 0.000(4)
 C72 0.034(5) 0.012(4) 0.027(5) 0.002(4) 0.003(4) -0.003(4)
 C73 0.032(6) 0.018(5) 0.039(6) 0.005(4) 0.002(4) 0.004(4)
 C74 0.037(6) 0.027(5) 0.042(7) 0.007(5) -0.004(5) 0.012(4)
 C75 0.040(6) 0.018(4) 0.024(5) 0.006(4) -0.005(4) -0.002(4)
 C76 0.031(5) 0.026(5) 0.016(5) -0.004(4) -0.002(4) 0.000(4)
 O18 0.038(5) 0.164(14) 0.039(5) -0.032(7) -0.009(4) -0.021(7)
 O19 0.038(4) 0.070(6) 0.037(5) -0.017(5) 0.014(4) -0.016(4)
 O20 0.026(4) 0.062(5) 0.029(4) -0.005(4) 0.003(3) -0.011(4)
 N9 0.037(5) 0.059(7) 0.026(5) -0.010(5) -0.004(4) -0.007(5)
 O24 0.068(7) 0.040(5) 0.071(7) 0.000(5) 0.008(6) 0.009(5)
 O25 0.042(5) 0.064(6) 0.040(5) 0.015(4) -0.004(4) 0.018(4)
 O26 0.039(5) 0.082(7) 0.053(6) 0.018(6) -0.007(5) -0.012(5)
 N11 0.034(5) 0.055(6) 0.022(5) -0.001(4) -0.001(4) 0.005(4)
 O27 0.032(4) 0.026(4) 0.030(4) 0.003(3) 0.003(3) -0.005(3)
 O28 0.055(7) 0.022(5) 0.027(6) 0.000 0.000 -0.012(5)
 N12 0.033(6) 0.025(5) 0.019(6) 0.000 0.000 -0.003(5)
 O29 0.073(9) 0.027(6) 0.027(6) 0.000 0.000 -0.011(6)
 O30 0.044(5) 0.041(5) 0.028(4) -0.012(3) -0.001(3) -0.011(4)
 N13 0.040(7) 0.019(5) 0.028(6) 0.000 0.000 -0.004(5)
 O37 0.042(5) 0.042(4) 0.024(4) 0.001(3) 0.002(3) -0.004(4)
 C77 0.034(6) 0.036(6) 0.043(7) 0.003(5) -0.001(5) -0.001(5)
 O38 0.044(5) 0.028(4) 0.035(4) -0.005(3) -0.016(4) 0.003(3)
 C78 0.043(6) 0.031(6) 0.032(6) 0.004(4) -0.001(5) 0.008(5)

_geom_special_details
;
 All esds (except the esd in the dihedral angle between two l.s. planes)
 are estimated using the full covariance matrix.  The cell esds are taken
 into account individually in the estimation of esds in distances, angles
 and torsion angles; correlations between esds in cell parameters are only
 used when they are defined by crystal symmetry.  An approximate (isotropic)
 treatment of cell esds is used for estimating esds involving l.s. planes.
;
loop_
  _geom_bond_atom_site_label_1
  _geom_bond_atom_site_label_2
  _geom_bond_distance
  _geom_bond_site_symmetry_2
  _geom_bond_publ_flag
 Er1 Cu1 3.4432(17) . ?
 Er1 Cu2 3.4732(16) . ?
 Er1 O1 2.296(7) . ?
 Er1 O2 2.283(6) . ?
 Er1 O3 2.377(7) . ?
 Er1 O4 2.363(7) . ?
 Er1 O5 2.297(7) . ?
 Er1 O6 2.324(7) . ?
 Er1 O7 2.251(7) . ?
 Er1 O8 2.412(6) . ?
 Cu1 O1 1.959(8) . ?
 Cu1 O2 1.939(7) . ?
 Cu1 O17 2.293(9) . ?
 Cu1 N1 1.997(11) . ?
 Cu1 N2 1.994(12) . ?
 Cu2 O5 1.902(7) . ?
 Cu2 O6 1.959(7) . ?
 Cu2 N3 1.995(9) . ?
 Cu2 N4 1.948(9) . ?
 O1 C1 1.345(12) . ?
 O2 C14 1.340(12) . ?
 O3 H3 0.855(14) . ?
 O3 C2 1.385(12) . ?
 O4 H4 0.861(16) . ?
 O4 C15 1.360(12) . ?
 O5 C20 1.326(12) . ?
 O6 C33 1.317(12) . ?
 O7 H7 0.80(5) . ?
 O7 C21 1.360(12) . ?
 O8 H8 0.850(13) . ?
 O8 C34 1.387(11) . ?
 O17 H17A 0.8500 . ?
 O17 H17B 0.8400 . ?
 N1 C7 1.297(16) . ?
 N1 C8 1.53(2) . ?
 N1 C8A 1.58(4) . ?
 N2 C12 1.52(2) . ?
 N2 C12A 1.70(4) . ?
 N2 C13 1.277(17) . ?
 N3 C26 1.299(14) . ?
 N3 C27 1.478(14) . ?
 N4 C31 1.465(13) . ?
 N4 C32 1.288(14) . ?
 C1 C2 1.373(14) . ?
 C1 C6 1.404(15) . ?
 C2 C3 1.383(14) . ?
 C3 H3A 0.9500 . ?
 C3 C4 1.405(16) . ?
 C4 H4A 0.9500 . ?
 C4 C5 1.354(18) . ?
 C5 H5 0.9500 . ?
 C5 C6 1.411(16) . ?
 C6 C7 1.433(17) . ?
 C7 H7A 0.9500 . ?
 C8 H8A 0.9900 . ?
 C8 H8B 0.9900 . ?
 C8 C9 1.47(2) . ?
 C8A H8AA 0.9900 . ?
 C8A H8AB 0.9900 . ?
 C8A C9 1.53(4) . ?
 C9 C10 1.52(2) . ?
 C9 C10A 1.55(4) . ?
 C9 C11 1.508(19) . ?
 C9 C11A 1.54(4) . ?
 C9 C12 1.54(2) . ?
 C9 C12A 1.47(4) . ?
 C10 H10A 0.9800 . ?
 C10 H10B 0.9800 . ?
 C10 H10C 0.9800 . ?
 C10A H10D 0.9803 . ?
 C10A H10E 0.9803 . ?
 C10A H10F 0.9803 . ?
 C11 H11A 0.9800 . ?
 C11 H11B 0.9800 . ?
 C11 H11C 0.9800 . ?
 C11A H11D 0.9801 . ?
 C11A H11E 0.9801 . ?
 C11A H11F 0.9801 . ?
 C12 H12A 0.9900 . ?
 C12 H12B 0.9900 . ?
 C12A H12C 0.9900 . ?
 C12A H12D 0.9900 . ?
 C13 H13 0.9500 . ?
 C13 C19 1.439(16) . ?
 C14 C15 1.404(14) . ?
 C14 C19 1.409(14) . ?
 C15 C16 1.393(14) . ?
 C16 H16 0.9500 . ?
 C16 C17 1.401(15) . ?
 C17 H17 0.9500 . ?
 C17 C18 1.382(16) . ?
 C18 H18 0.9500 . ?
 C18 C19 1.385(14) . ?
 C20 C21 1.412(15) . ?
 C20 C25 1.420(14) . ?
 C21 C22 1.366(14) . ?
 C22 H22 0.9500 . ?
 C22 C23 1.422(16) . ?
 C23 H23 0.9500 . ?
 C23 C24 1.366(17) . ?
 C24 H24 0.9500 . ?
 C24 C25 1.420(15) . ?
 C25 C26 1.453(15) . ?
 C26 H26 0.9500 . ?
 C27 H27A 0.9900 . ?
 C27 H27B 0.9900 . ?
 C27 C28 1.518(16) . ?
 C28 C29 1.554(15) . ?
 C28 C30 1.526(15) . ?
 C28 C31 1.514(16) . ?
 C29 H29A 0.9800 . ?
 C29 H29B 0.9800 . ?
 C29 H29C 0.9800 . ?
 C30 H30A 0.9800 . ?
 C30 H30B 0.9800 . ?
 C30 H30C 0.9800 . ?
 C31 H31A 0.9900 . ?
 C31 H31B 0.9900 . ?
 C32 H32 0.9500 . ?
 C32 C38 1.436(14) . ?
 C33 C34 1.398(14) . ?
 C33 C38 1.428(13) . ?
 C34 C35 1.411(13) . ?
 C35 H35 0.9500 . ?
 C35 C36 1.378(16) . ?
 C36 H36 0.9500 . ?
 C36 C37 1.394(15) . ?
 C37 H37 0.9500 . ?
 C37 C38 1.398(14) . ?
 Er2 Cu4 3.4743(15) . ?
 Er2 Cu3 3.4492(15) . ?
 Er2 O9 2.301(7) . ?
 Er2 O10 2.312(7) . ?
 Er2 O11 2.355(7) . ?
 Er2 O12 2.388(7) . ?
 Er2 O13 2.286(7) . ?
 Er2 O14 2.314(6) . ?
 Er2 O15 2.238(7) . ?
 Er2 O16 2.417(7) . ?
 Cu4 O13 1.915(7) . ?
 Cu4 O14 1.958(7) . ?
 Cu4 N5 1.969(9) . ?
 Cu4 N6 1.965(9) . ?
 Cu3 O9 1.922(7) . ?
 Cu3 O10 1.952(7) . ?
 Cu3 O21 2.438(11) . ?
 Cu3 N7 1.977(9) . ?
 Cu3 N8 1.962(9) . ?
 O9 C58 1.321(12) . ?
 O10 C71 1.321(12) . ?
 O11 H11 0.851(14) . ?
 O11 C59 1.382(11) . ?
 O12 H12 0.859(14) . ?
 O12 C72 1.389(12) . ?
 O13 C39 1.336(12) . ?
 O14 C52 1.330(12) . ?
 O15 H15 0.90(6) . ?
 O15 C40 1.345(12) . ?
 O16 H16A 0.852(13) . ?
 O16 C53 1.360(12) . ?
 O21 N10 1.237(14) . ?
 O22 N10 1.221(14) . ?
 O23 N10 1.226(13) . ?
 N5 C45 1.296(14) . ?
 N5 C46 1.489(13) . ?
 N6 C50 1.489(12) . ?
 N6 C51 1.286(14) . ?
 N7 C64 1.298(14) . ?
 N7 C65 1.467(13) . ?
 N8 C69 1.462(13) . ?
 N8 C70 1.292(13) . ?
 C39 C40 1.430(14) . ?
 C39 C44 1.392(14) . ?
 C40 C41 1.374(14) . ?
 C41 H41 0.9500 . ?
 C41 C42 1.408(15) . ?
 C42 H42 0.9500 . ?
 C42 C43 1.362(15) . ?
 C43 H43 0.9500 . ?
 C43 C44 1.428(13) . ?
 C44 C45 1.434(14) . ?
 C45 H45 0.9500 . ?
 C46 H46A 0.9900 . ?
 C46 H46B 0.9900 . ?
 C46 C47 1.494(16) . ?
 C47 C48 1.524(16) . ?
 C47 C49 1.553(14) . ?
 C47 C50 1.526(15) . ?
 C48 H48A 0.9800 . ?
 C48 H48B 0.9800 . ?
 C48 H48C 0.9800 . ?
 C49 H49A 0.9800 . ?
 C49 H49B 0.9800 . ?
 C49 H49C 0.9800 . ?
 C50 H50A 0.9900 . ?
 C50 H50B 0.9900 . ?
 C51 H51 0.9500 . ?
 C51 C57 1.453(15) . ?
 C52 C53 1.381(14) . ?
 C52 C57 1.403(13) . ?
 C53 C54 1.424(14) . ?
 C54 H54 0.9500 . ?
 C54 C55 1.366(16) . ?
 C55 H55 0.9500 . ?
 C55 C56 1.391(16) . ?
 C56 H56 0.9500 . ?
 C56 C57 1.416(14) . ?
 C58 C59 1.385(15) . ?
 C58 C63 1.428(15) . ?
 C59 C60 1.380(14) . ?
 C60 H60 0.9500 . ?
 C60 C61 1.384(15) . ?
 C61 H61 0.9500 . ?
 C61 C62 1.369(16) . ?
 C62 H62 0.9500 . ?
 C62 C63 1.401(15) . ?
 C63 C64 1.422(15) . ?
 C64 H64 0.9500 . ?
 C65 H65A 0.9900 . ?
 C65 H65B 0.9900 . ?
 C65 C66 1.520(15) . ?
 C66 C67 1.511(15) . ?
 C66 C68 1.554(13) . ?
 C66 C69 1.538(14) . ?
 C67 H67A 0.9800 . ?
 C67 H67B 0.9800 . ?
 C67 H67C 0.9800 . ?
 C68 H68A 0.9800 . ?
 C68 H68B 0.9800 . ?
 C68 H68C 0.9800 . ?
 C69 H69A 0.9900 . ?
 C69 H69B 0.9900 . ?
 C70 H70 0.9500 . ?
 C70 C76 1.453(14) . ?
 C71 C72 1.386(14) . ?
 C71 C76 1.411(14) . ?
 C72 C73 1.410(13) . ?
 C73 H73 0.9500 . ?
 C73 C74 1.382(17) . ?
 C74 H74 0.9500 . ?
 C74 C75 1.396(16) . ?
 C75 H75 0.9500 . ?
 C75 C76 1.412(14) . ?
 O18 N9 1.242(14) . ?
 O19 N9 1.254(13) . ?
 O20 N9 1.263(13) . ?
 O24 N11 1.264(14) . ?
 O25 N11 1.254(13) . ?
 O26 N11 1.231(14) . ?
 O27 N12 1.235(10) . ?
 O28 N12 1.286(18) . ?
 N12 O27 1.235(10) 2_565 ?
 O29 N13 1.275(19) . ?
 O30 N13 1.247(10) . ?
 N13 O30 1.247(10) 2_665 ?
 O37 H37A 0.8401 . ?
 O37 C77 1.441(14) . ?
 C77 H77A 0.9800 . ?
 C77 H77B 0.9800 . ?
 C77 H77C 0.9800 . ?
 O34 N15 1.136(11) . ?
 N15 O35 1.21(2) . ?
 N15 O36 1.206(15) . ?
 O38 H38 0.8401 . ?
 O38 C78 1.405(13) . ?
 C78 H78A 0.9801 . ?
 C78 H78B 0.9801 . ?
 C78 H78C 0.9801 . ?
 O32 N14 1.268(13) . ?
 N14 O33 1.230(15) . ?
 N14 O31 1.228(19) . ?
 O39 H39A 0.8700 . ?
 O39 H39B 0.8700 . ?

loop_
  _geom_angle_atom_site_label_1
  _geom_angle_atom_site_label_2
  _geom_angle_atom_site_label_3
  _geom_angle
  _geom_angle_site_symmetry_1
  _geom_angle_site_symmetry_3
  _geom_angle_publ_flag
 Cu1 Er1 Cu2 174.34(5) . . ?
 O1 Er1 Cu1 32.80(18) . . ?
 O1 Er1 Cu2 152.22(18) . . ?
 O1 Er1 O3 66.7(2) . . ?
 O1 Er1 O4 131.2(2) . . ?
 O1 Er1 O5 139.0(2) . . ?
 O1 Er1 O6 137.1(3) . . ?
 O1 Er1 O8 86.2(2) . . ?
 O2 Er1 Cu1 32.16(17) . . ?
 O2 Er1 Cu2 143.42(18) . . ?
 O2 Er1 O1 64.2(2) . . ?
 O2 Er1 O3 130.8(2) . . ?
 O2 Er1 O4 67.0(2) . . ?
 O2 Er1 O5 137.1(3) . . ?
 O2 Er1 O6 131.3(2) . . ?
 O2 Er1 O8 76.0(2) . . ?
 O3 Er1 Cu1 99.43(17) . . ?
 O3 Er1 Cu2 85.49(17) . . ?
 O3 Er1 O8 96.8(2) . . ?
 O4 Er1 Cu1 98.83(17) . . ?
 O4 Er1 Cu2 76.45(17) . . ?
 O4 Er1 O3 161.4(2) . . ?
 O4 Er1 O8 81.7(3) . . ?
 O5 Er1 Cu1 146.29(18) . . ?
 O5 Er1 Cu2 30.68(17) . . ?
 O5 Er1 O3 85.6(2) . . ?
 O5 Er1 O4 81.1(2) . . ?
 O5 Er1 O6 63.0(2) . . ?
 O5 Er1 O8 128.4(2) . . ?
 O6 Er1 Cu1 150.33(18) . . ?
 O6 Er1 Cu2 32.42(17) . . ?
 O6 Er1 O3 84.3(2) . . ?
 O6 Er1 O4 78.2(3) . . ?
 O6 Er1 O8 65.9(2) . . ?
 O7 Er1 Cu1 76.68(19) . . ?
 O7 Er1 Cu2 100.28(19) . . ?
 O7 Er1 O1 82.3(3) . . ?
 O7 Er1 O2 83.7(3) . . ?
 O7 Er1 O3 94.1(3) . . ?
 O7 Er1 O4 93.3(3) . . ?
 O7 Er1 O5 69.7(3) . . ?
 O7 Er1 O6 132.7(3) . . ?
 O7 Er1 O8 159.5(3) . . ?
 O8 Er1 Cu1 84.44(16) . . ?
 O8 Er1 Cu2 97.82(16) . . ?
 O1 Cu1 Er1 39.4(2) . . ?
 O1 Cu1 O17 89.1(3) . . ?
 O1 Cu1 N1 92.0(4) . . ?
 O1 Cu1 N2 166.5(4) . . ?
 O2 Cu1 Er1 38.82(19) . . ?
 O2 Cu1 O1 77.3(3) . . ?
 O2 Cu1 O17 90.8(3) . . ?
 O2 Cu1 N1 169.0(4) . . ?
 O2 Cu1 N2 91.5(4) . . ?
 O17 Cu1 Er1 83.4(2) . . ?
 N1 Cu1 Er1 130.9(3) . . ?
 N1 Cu1 O17 91.6(5) . . ?
 N2 Cu1 Er1 130.2(3) . . ?
 N2 Cu1 O17 98.7(6) . . ?
 N2 Cu1 N1 98.8(4) . . ?
 O5 Cu2 Er1 38.06(19) . . ?
 O5 Cu2 O6 77.5(3) . . ?
 O5 Cu2 N3 93.3(3) . . ?
 O5 Cu2 N4 168.4(3) . . ?
 O6 Cu2 Er1 39.5(2) . . ?
 O6 Cu2 N3 169.4(3) . . ?
 N3 Cu2 Er1 130.8(3) . . ?
 N4 Cu2 Er1 131.6(2) . . ?
 N4 Cu2 O6 92.2(3) . . ?
 N4 Cu2 N3 97.5(4) . . ?
 Cu1 O1 Er1 107.8(3) . . ?
 C1 O1 Er1 121.4(6) . . ?
 C1 O1 Cu1 128.6(7) . . ?
 Cu1 O2 Er1 109.0(3) . . ?
 C14 O2 Er1 122.0(6) . . ?
 C14 O2 Cu1 128.4(6) . . ?
 Er1 O3 H3 131(2) . . ?
 C2 O3 Er1 118.3(6) . . ?
 C2 O3 H3 109(2) . . ?
 Er1 O4 H4 131(2) . . ?
 C15 O4 Er1 119.9(6) . . ?
 C15 O4 H4 109(2) . . ?
 Cu2 O5 Er1 111.3(3) . . ?
 C20 O5 Er1 117.5(6) . . ?
 C20 O5 Cu2 128.8(7) . . ?
 Cu2 O6 Er1 108.1(3) . . ?
 C33 O6 Er1 122.7(6) . . ?
 C33 O6 Cu2 126.3(6) . . ?
 Er1 O7 H7 123(2) . . ?
 C21 O7 Er1 118.7(6) . . ?
 C21 O7 H7 116(2) . . ?
 Er1 O8 H8 132(2) . . ?
 C34 O8 Er1 118.8(5) . . ?
 C34 O8 H8 109(2) . . ?
 Cu1 O17 H17A 109.0 . . ?
 Cu1 O17 H17B 104.0 . . ?
 H17A O17 H17B 105.1 . . ?
 C7 N1 Cu1 124.1(8) . . ?
 C7 N1 C8 116.6(12) . . ?
 C7 N1 C8A 109.2(18) . . ?
 C8 N1 Cu1 116.7(10) . . ?
 C8A N1 Cu1 121.9(16) . . ?
 C12 N2 Cu1 118.8(10) . . ?
 C12A N2 Cu1 112.5(14) . . ?
 C13 N2 Cu1 125.3(9) . . ?
 C13 N2 C12 113.7(12) . . ?
 C13 N2 C12A 112.9(16) . . ?
 C26 N3 Cu2 123.4(7) . . ?
 C26 N3 C27 113.7(9) . . ?
 C27 N3 Cu2 122.9(7) . . ?
 C31 N4 Cu2 118.1(7) . . ?
 C32 N4 Cu2 123.9(7) . . ?
 C32 N4 C31 118.0(9) . . ?
 O1 C1 C2 117.4(9) . . ?
 O1 C1 C6 122.3(9) . . ?
 C2 C1 C6 120.3(9) . . ?
 C1 C2 O3 114.7(9) . . ?
 C1 C2 C3 121.3(10) . . ?
 C3 C2 O3 124.1(9) . . ?
 C2 C3 H3A 120.4 . . ?
 C2 C3 C4 119.0(11) . . ?
 C4 C3 H3A 120.6 . . ?
 C3 C4 H4A 120.1 . . ?
 C5 C4 C3 119.9(11) . . ?
 C5 C4 H4A 120.0 . . ?
 C4 C5 H5 119.2 . . ?
 C4 C5 C6 121.9(10) . . ?
 C6 C5 H5 119.0 . . ?
 C1 C6 C5 117.6(10) . . ?
 C1 C6 C7 124.3(10) . . ?
 C5 C6 C7 118.1(10) . . ?
 N1 C7 C6 128.0(11) . . ?
 N1 C7 H7A 115.9 . . ?
 C6 C7 H7A 116.0 . . ?
 N1 C8 H8A 108.7 . . ?
 N1 C8 H8B 108.9 . . ?
 H8A C8 H8B 107.6 . . ?
 C9 C8 N1 113.9(14) . . ?
 C9 C8 H8A 108.7 . . ?
 C9 C8 H8B 108.8 . . ?
 N1 C8A H8AA 109.0 . . ?
 N1 C8A H8AB 109.8 . . ?
 H8AA C8A H8AB 108.3 . . ?
 C9 C8A N1 108(2) . . ?
 C9 C8A H8AA 110.1 . . ?
 C9 C8A H8AB 111.0 . . ?
 C8 C9 C10 113.4(13) . . ?
 C8 C9 C11 109.0(12) . . ?
 C8 C9 C12 111.6(12) . . ?
 C8A C9 C10A 108(2) . . ?
 C8A C9 C11A 103(2) . . ?
 C10 C9 C12 108.1(13) . . ?
 C11 C9 C10 109.0(13) . . ?
 C11 C9 C12 105.3(12) . . ?
 C11A C9 C10A 110(2) . . ?
 C12A C9 C8A 113(2) . . ?
 C12A C9 C10A 113(2) . . ?
 C12A C9 C11A 108(2) . . ?
 C9 C10 H10A 109.6 . . ?
 C9 C10 H10B 109.4 . . ?
 C9 C10 H10C 109.4 . . ?
 H10A C10 H10B 109.5 . . ?
 H10A C10 H10C 109.5 . . ?
 H10B C10 H10C 109.5 . . ?
 C9 C10A H10D 109.5 . . ?
 C9 C10A H10E 109.6 . . ?
 C9 C10A H10F 109.4 . . ?
 H10D C10A H10E 109.4 . . ?
 H10D C10A H10F 109.4 . . ?
 H10E C10A H10F 109.4 . . ?
 C9 C11 H11A 109.6 . . ?
 C9 C11 H11B 109.5 . . ?
 C9 C11 H11C 109.3 . . ?
 H11A C11 H11B 109.5 . . ?
 H11A C11 H11C 109.5 . . ?
 H11B C11 H11C 109.5 . . ?
 C9 C11A H11D 109.9 . . ?
 C9 C11A H11E 109.1 . . ?
 C9 C11A H11F 109.4 . . ?
 H11D C11A H11E 109.4 . . ?
 H11D C11A H11F 109.5 . . ?
 H11E C11A H11F 109.5 . . ?
 N2 C12 C9 111.7(13) . . ?
 N2 C12 H12A 109.3 . . ?
 N2 C12 H12B 109.3 . . ?
 C9 C12 H12A 109.2 . . ?
 C9 C12 H12B 109.3 . . ?
 H12A C12 H12B 107.9 . . ?
 N2 C12A H12C 110.7 . . ?
 N2 C12A H12D 110.5 . . ?
 C9 C12A N2 106(2) . . ?
 C9 C12A H12C 110.6 . . ?
 C9 C12A H12D 110.6 . . ?
 H12C C12A H12D 108.8 . . ?
 N2 C13 H13 115.8 . . ?
 N2 C13 C19 128.3(11) . . ?
 C19 C13 H13 115.9 . . ?
 O2 C14 C15 117.0(9) . . ?
 O2 C14 C19 124.2(8) . . ?
 C15 C14 C19 118.8(9) . . ?
 O4 C15 C14 113.9(9) . . ?
 O4 C15 C16 125.3(9) . . ?
 C16 C15 C14 120.8(9) . . ?
 C15 C16 H16 120.4 . . ?
 C15 C16 C17 119.3(9) . . ?
 C17 C16 H16 120.3 . . ?
 C16 C17 H17 119.9 . . ?
 C18 C17 C16 120.2(10) . . ?
 C18 C17 H17 119.9 . . ?
 C17 C18 H18 119.5 . . ?
 C17 C18 C19 120.9(10) . . ?
 C19 C18 H18 119.6 . . ?
 C14 C19 C13 121.8(10) . . ?
 C18 C19 C13 118.3(10) . . ?
 C18 C19 C14 119.9(10) . . ?
 O5 C20 C21 116.9(9) . . ?
 O5 C20 C25 123.6(10) . . ?
 C21 C20 C25 119.5(9) . . ?
 O7 C21 C20 115.5(9) . . ?
 O7 C21 C22 123.8(10) . . ?
 C22 C21 C20 120.7(9) . . ?
 C21 C22 H22 120.0 . . ?
 C21 C22 C23 119.8(10) . . ?
 C23 C22 H22 120.2 . . ?
 C22 C23 H23 119.5 . . ?
 C24 C23 C22 121.0(10) . . ?
 C24 C23 H23 119.5 . . ?
 C23 C24 H24 120.0 . . ?
 C23 C24 C25 119.9(10) . . ?
 C25 C24 H24 120.0 . . ?
 C20 C25 C26 122.6(10) . . ?
 C24 C25 C20 119.1(10) . . ?
 C24 C25 C26 118.3(9) . . ?
 N3 C26 C25 127.6(9) . . ?
 N3 C26 H26 116.2 . . ?
 C25 C26 H26 116.2 . . ?
 N3 C27 H27A 108.0 . . ?
 N3 C27 H27B 108.1 . . ?
 N3 C27 C28 116.9(9) . . ?
 H27A C27 H27B 107.3 . . ?
 C28 C27 H27A 108.1 . . ?
 C28 C27 H27B 108.0 . . ?
 C27 C28 C29 113.1(10) . . ?
 C27 C28 C30 107.2(9) . . ?
 C30 C28 C29 108.1(9) . . ?
 C31 C28 C27 110.7(9) . . ?
 C31 C28 C29 110.0(9) . . ?
 C31 C28 C30 107.5(10) . . ?
 C28 C29 H29A 109.6 . . ?
 C28 C29 H29B 109.5 . . ?
 C28 C29 H29C 109.3 . . ?
 H29A C29 H29B 109.5 . . ?
 H29A C29 H29C 109.5 . . ?
 H29B C29 H29C 109.5 . . ?
 C28 C30 H30A 109.4 . . ?
 C28 C30 H30B 109.4 . . ?
 C28 C30 H30C 109.5 . . ?
 H30A C30 H30B 109.5 . . ?
 H30A C30 H30C 109.5 . . ?
 H30B C30 H30C 109.5 . . ?
 N4 C31 C28 113.2(9) . . ?
 N4 C31 H31A 108.9 . . ?
 N4 C31 H31B 108.9 . . ?
 C28 C31 H31A 108.9 . . ?
 C28 C31 H31B 109.0 . . ?
 H31A C31 H31B 107.7 . . ?
 N4 C32 H32 115.7 . . ?
 N4 C32 C38 128.5(10) . . ?
 C38 C32 H32 115.8 . . ?
 O6 C33 C34 117.9(9) . . ?
 O6 C33 C38 123.5(9) . . ?
 C34 C33 C38 118.5(9) . . ?
 O8 C34 C33 113.8(8) . . ?
 O8 C34 C35 124.6(9) . . ?
 C33 C34 C35 121.5(9) . . ?
 C34 C35 H35 120.2 . . ?
 C36 C35 C34 119.6(9) . . ?
 C36 C35 H35 120.2 . . ?
 C35 C36 H36 120.2 . . ?
 C35 C36 C37 119.7(9) . . ?
 C37 C36 H36 120.2 . . ?
 C36 C37 H37 119.1 . . ?
 C36 C37 C38 122.0(10) . . ?
 C38 C37 H37 119.0 . . ?
 C33 C38 C32 121.7(9) . . ?
 C37 C38 C32 119.6(9) . . ?
 C37 C38 C33 118.7(9) . . ?
 Cu3 Er2 Cu4 171.28(4) . . ?
 O9 Er2 Cu4 144.00(18) . . ?
 O9 Er2 Cu3 31.75(17) . . ?
 O9 Er2 O10 64.3(2) . . ?
 O9 Er2 O11 66.9(2) . . ?
 O9 Er2 O12 130.8(2) . . ?
 O9 Er2 O14 133.0(3) . . ?
 O9 Er2 O16 81.1(2) . . ?
 O10 Er2 Cu4 150.58(17) . . ?
 O10 Er2 Cu3 32.63(17) . . ?
 O10 Er2 O11 130.2(2) . . ?
 O10 Er2 O12 66.5(2) . . ?
 O10 Er2 O14 130.4(3) . . ?
 O10 Er2 O16 75.8(3) . . ?
 O11 Er2 Cu4 77.13(17) . . ?
 O11 Er2 Cu3 97.88(17) . . ?
 O11 Er2 O12 159.4(2) . . ?
 O11 Er2 O16 87.8(3) . . ?
 O12 Er2 Cu4 84.50(16) . . ?
 O12 Er2 Cu3 99.08(16) . . ?
 O12 Er2 O16 85.4(3) . . ?
 O13 Er2 Cu4 30.91(18) . . ?
 O13 Er2 Cu3 155.89(17) . . ?
 O13 Er2 O9 134.3(2) . . ?
 O13 Er2 O10 146.2(2) . . ?
 O13 Er2 O11 79.1(2) . . ?
 O13 Er2 O12 89.9(2) . . ?
 O13 Er2 O14 63.2(2) . . ?
 O13 Er2 O16 128.5(2) . . ?
 O14 Er2 Cu4 32.28(18) . . ?
 O14 Er2 Cu3 140.24(18) . . ?
 O14 Er2 O11 79.2(3) . . ?
 O14 Er2 O12 80.3(3) . . ?
 O14 Er2 O16 65.4(2) . . ?
 O15 Er2 Cu4 100.56(19) . . ?
 O15 Er2 Cu3 86.78(18) . . ?
 O15 Er2 O9 82.5(3) . . ?
 O15 Er2 O10 89.6(3) . . ?
 O15 Er2 O11 93.5(3) . . ?
 O15 Er2 O12 99.0(3) . . ?
 O15 Er2 O13 69.7(3) . . ?
 O15 Er2 O14 132.8(3) . . ?
 O15 Er2 O16 161.6(2) . . ?
 O16 Er2 Cu4 97.65(16) . . ?
 O16 Er2 Cu3 74.84(16) . . ?
 O13 Cu4 Er2 37.8(2) . . ?
 O13 Cu4 O14 77.0(3) . . ?
 O13 Cu4 N5 91.4(3) . . ?
 O13 Cu4 N6 169.7(3) . . ?
 O14 Cu4 Er2 39.14(19) . . ?
 O14 Cu4 N5 168.1(3) . . ?
 O14 Cu4 N6 92.7(3) . . ?
 N5 Cu4 Er2 129.2(3) . . ?
 N6 Cu4 Er2 131.9(3) . . ?
 N6 Cu4 N5 98.9(4) . . ?
 O9 Cu3 Er2 39.04(19) . . ?
 O9 Cu3 O10 78.6(3) . . ?
 O9 Cu3 O21 88.7(4) . . ?
 O9 Cu3 N7 91.9(3) . . ?
 O9 Cu3 N8 168.6(3) . . ?
 O10 Cu3 Er2 39.7(2) . . ?
 O10 Cu3 O21 110.1(4) . . ?
 O10 Cu3 N7 163.4(3) . . ?
 O10 Cu3 N8 91.9(3) . . ?
 O21 Cu3 Er2 100.0(3) . . ?
 N7 Cu3 Er2 130.2(3) . . ?
 N7 Cu3 O21 83.0(4) . . ?
 N8 Cu3 Er2 130.9(3) . . ?
 N8 Cu3 O21 88.6(4) . . ?
 N8 Cu3 N7 98.7(4) . . ?
 Cu3 O9 Er2 109.2(3) . . ?
 C58 O9 Er2 121.7(6) . . ?
 C58 O9 Cu3 127.8(6) . . ?
 Cu3 O10 Er2 107.7(3) . . ?
 C71 O10 Er2 121.6(6) . . ?
 C71 O10 Cu3 128.1(6) . . ?
 Er2 O11 H11 132(2) . . ?
 C59 O11 Er2 119.6(6) . . ?
 C59 O11 H11 109(2) . . ?
 Er2 O12 H12 129(3) . . ?
 C72 O12 Er2 117.7(5) . . ?
 C72 O12 H12 107(3) . . ?
 Cu4 O13 Er2 111.3(3) . . ?
 C39 O13 Er2 117.9(6) . . ?
 C39 O13 Cu4 129.3(6) . . ?
 Cu4 O14 Er2 108.6(3) . . ?
 C52 O14 Er2 123.3(6) . . ?
 C52 O14 Cu4 127.6(6) . . ?
 Er2 O15 H15 130(3) . . ?
 C40 O15 Er2 119.2(6) . . ?
 C40 O15 H15 111(2) . . ?
 Er2 O16 H16A 128(2) . . ?
 C53 O16 Er2 119.2(6) . . ?
 C53 O16 H16A 112(2) . . ?
 N10 O21 Cu3 121.2(9) . . ?
 C45 N5 Cu4 124.6(8) . . ?
 C45 N5 C46 115.4(9) . . ?
 C46 N5 Cu4 120.0(7) . . ?
 C50 N6 Cu4 119.7(7) . . ?
 C51 N6 Cu4 124.6(7) . . ?
 C51 N6 C50 115.4(9) . . ?
 C64 N7 Cu3 122.3(7) . . ?
 C64 N7 C65 114.6(9) . . ?
 C65 N7 Cu3 122.7(7) . . ?
 C69 N8 Cu3 117.0(7) . . ?
 C70 N8 Cu3 126.4(7) . . ?
 C70 N8 C69 116.7(9) . . ?
 O22 N10 O21 117.0(12) . . ?
 O22 N10 O23 122.5(12) . . ?
 O23 N10 O21 120.4(12) . . ?
 O13 C39 C40 115.1(8) . . ?
 O13 C39 C44 122.9(9) . . ?
 C44 C39 C40 121.9(9) . . ?
 O15 C40 C39 115.8(9) . . ?
 O15 C40 C41 125.6(9) . . ?
 C41 C40 C39 118.6(9) . . ?
 C40 C41 H41 119.8 . . ?
 C40 C41 C42 120.4(10) . . ?
 C42 C41 H41 119.8 . . ?
 C41 C42 H42 119.6 . . ?
 C43 C42 C41 120.6(10) . . ?
 C43 C42 H42 119.8 . . ?
 C42 C43 H43 119.3 . . ?
 C42 C43 C44 121.4(9) . . ?
 C44 C43 H43 119.3 . . ?
 C39 C44 C43 117.0(9) . . ?
 C39 C44 C45 122.6(9) . . ?
 C43 C44 C45 119.9(9) . . ?
 N5 C45 C44 127.3(10) . . ?
 N5 C45 H45 116.4 . . ?
 C44 C45 H45 116.3 . . ?
 N5 C46 H46A 108.7 . . ?
 N5 C46 H46B 108.7 . . ?
 N5 C46 C47 114.4(9) . . ?
 H46A C46 H46B 107.6 . . ?
 C47 C46 H46A 108.6 . . ?
 C47 C46 H46B 108.7 . . ?
 C46 C47 C48 111.9(10) . . ?
 C46 C47 C49 107.7(9) . . ?
 C46 C47 C50 111.5(9) . . ?
 C48 C47 C49 108.3(9) . . ?
 C48 C47 C50 111.6(10) . . ?
 C50 C47 C49 105.5(9) . . ?
 C47 C48 H48A 109.5 . . ?
 C47 C48 H48B 109.5 . . ?
 C47 C48 H48C 109.4 . . ?
 H48A C48 H48B 109.5 . . ?
 H48A C48 H48C 109.5 . . ?
 H48B C48 H48C 109.5 . . ?
 C47 C49 H49A 109.5 . . ?
 C47 C49 H49B 109.5 . . ?
 C47 C49 H49C 109.5 . . ?
 H49A C49 H49B 109.5 . . ?
 H49A C49 H49C 109.5 . . ?
 H49B C49 H49C 109.5 . . ?
 N6 C50 C47 114.7(8) . . ?
 N6 C50 H50A 108.6 . . ?
 N6 C50 H50B 108.6 . . ?
 C47 C50 H50A 108.6 . . ?
 C47 C50 H50B 108.5 . . ?
 H50A C50 H50B 107.6 . . ?
 N6 C51 H51 116.1 . . ?
 N6 C51 C57 127.7(10) . . ?
 C57 C51 H51 116.1 . . ?
 O14 C52 C53 116.9(9) . . ?
 O14 C52 C57 123.5(9) . . ?
 C53 C52 C57 119.6(9) . . ?
 O16 C53 C52 115.0(9) . . ?
 O16 C53 C54 124.2(9) . . ?
 C52 C53 C54 120.8(10) . . ?
 C53 C54 H54 120.3 . . ?
 C55 C54 C53 119.6(10) . . ?
 C55 C54 H54 120.2 . . ?
 C54 C55 H55 119.8 . . ?
 C54 C55 C56 120.4(10) . . ?
 C56 C55 H55 119.7 . . ?
 C55 C56 H56 119.8 . . ?
 C55 C56 C57 120.5(10) . . ?
 C57 C56 H56 119.7 . . ?
 C52 C57 C51 123.2(9) . . ?
 C52 C57 C56 119.0(9) . . ?
 C56 C57 C51 117.7(9) . . ?
 O9 C58 C59 118.1(9) . . ?
 O9 C58 C63 122.2(9) . . ?
 C59 C58 C63 119.6(9) . . ?
 O11 C59 C58 113.7(8) . . ?
 C60 C59 O11 124.9(9) . . ?
 C60 C59 C58 121.3(9) . . ?
 C59 C60 H60 120.3 . . ?
 C59 C60 C61 119.5(10) . . ?
 C61 C60 H60 120.2 . . ?
 C60 C61 H61 119.8 . . ?
 C62 C61 C60 120.4(10) . . ?
 C62 C61 H61 119.8 . . ?
 C61 C62 H62 119.0 . . ?
 C61 C62 C63 121.9(10) . . ?
 C63 C62 H62 119.1 . . ?
 C62 C63 C58 117.3(9) . . ?
 C62 C63 C64 120.4(10) . . ?
 C64 C63 C58 122.3(10) . . ?
 N7 C64 C63 128.9(10) . . ?
 N7 C64 H64 115.6 . . ?
 C63 C64 H64 115.5 . . ?
 N7 C65 H65A 108.2 . . ?
 N7 C65 H65B 108.1 . . ?
 N7 C65 C66 116.6(8) . . ?
 H65A C65 H65B 107.3 . . ?
 C66 C65 H65A 108.1 . . ?
 C66 C65 H65B 108.2 . . ?
 C65 C66 C68 106.6(8) . . ?
 C65 C66 C69 111.7(9) . . ?
 C67 C66 C65 110.7(9) . . ?
 C67 C66 C68 108.9(9) . . ?
 C67 C66 C69 111.9(9) . . ?
 C69 C66 C68 106.8(8) . . ?
 C66 C67 H67A 109.5 . . ?
 C66 C67 H67B 109.5 . . ?
 C66 C67 H67C 109.4 . . ?
 H67A C67 H67B 109.5 . . ?
 H67A C67 H67C 109.5 . . ?
 H67B C67 H67C 109.5 . . ?
 C66 C68 H68A 109.4 . . ?
 C66 C68 H68B 109.5 . . ?
 C66 C68 H68C 109.6 . . ?
 H68A C68 H68B 109.5 . . ?
 H68A C68 H68C 109.5 . . ?
 H68B C68 H68C 109.5 . . ?
 N8 C69 C66 111.3(8) . . ?
 N8 C69 H69A 109.3 . . ?
 N8 C69 H69B 109.4 . . ?
 C66 C69 H69A 109.4 . . ?
 C66 C69 H69B 109.4 . . ?
 H69A C69 H69B 108.0 . . ?
 N8 C70 H70 116.9 . . ?
 N8 C70 C76 126.3(10) . . ?
 C76 C70 H70 116.9 . . ?
 O10 C71 C72 117.4(9) . . ?
 O10 C71 C76 123.9(9) . . ?
 C72 C71 C76 118.6(9) . . ?
 O12 C72 C73 122.7(9) . . ?
 C71 C72 O12 114.8(8) . . ?
 C71 C72 C73 122.5(10) . . ?
 C72 C73 H73 120.9 . . ?
 C74 C73 C72 118.2(10) . . ?
 C74 C73 H73 121.0 . . ?
 C73 C74 H74 119.5 . . ?
 C73 C74 C75 121.0(10) . . ?
 C75 C74 H74 119.5 . . ?
 C74 C75 H75 119.9 . . ?
 C74 C75 C76 120.3(10) . . ?
 C76 C75 H75 119.8 . . ?
 C71 C76 C70 122.8(9) . . ?
 C75 C76 C70 117.8(9) . . ?
 C75 C76 C71 119.4(9) . . ?
 O18 N9 O19 119.7(11) . . ?
 O18 N9 O20 122.6(11) . . ?
 O19 N9 O20 117.7(10) . . ?
 O25 N11 O24 120.3(11) . . ?
 O26 N11 O24 119.3(11) . . ?
 O26 N11 O25 120.4(12) . . ?
 O27 N12 O27 122.2(13) . 2_565 ?
 O27 N12 O28 118.9(6) . . ?
 O27 N12 O28 118.9(6) 2_565 . ?
 O30 N13 O29 117.5(7) 2_665 . ?
 O30 N13 O29 117.5(7) . . ?
 O30 N13 O30 124.9(14) 2_665 . ?
 C77 O37 H37A 109.5 . . ?
 O37 C77 H77A 109.4 . . ?
 O37 C77 H77B 109.5 . . ?
 O37 C77 H77C 109.6 . . ?
 H77A C77 H77B 109.5 . . ?
 H77A C77 H77C 109.5 . . ?
 H77B C77 H77C 109.5 . . ?
 O35 N15 O34 115(2) . . ?
 O35 N15 O36 125(3) . . ?
 O36 N15 O34 125(2) . . ?
 C78 O38 H38 115.0 . . ?
 O38 C78 H78A 109.3 . . ?
 O38 C78 H78B 109.6 . . ?
 O38 C78 H78C 109.5 . . ?
 H78A C78 H78B 109.5 . . ?
 H78A C78 H78C 109.5 . . ?
 H78B C78 H78C 109.5 . . ?
 O33 N14 O32 119(4) . . ?
 O31 N14 O32 122(4) . . ?
 O31 N14 O33 117(4) . . ?
 H39A O39 H39B 109.5 . . ?

loop_
  _geom_torsion_atom_site_label_1
  _geom_torsion_atom_site_label_2
  _geom_torsion_atom_site_label_3
  _geom_torsion_atom_site_label_4
  _geom_torsion
  _geom_torsion_site_symmetry_1
  _geom_torsion_site_symmetry_2
  _geom_torsion_site_symmetry_3
  _geom_torsion_site_symmetry_4
  _geom_torsion_publ_flag
 Er1 O1 C1 C2 -10.0(11) . . . . ?
 Er1 O1 C1 C6 169.5(7) . . . . ?
 Er1 O2 C14 C15 0.5(12) . . . . ?
 Er1 O2 C14 C19 -179.8(7) . . . . ?
 Er1 O3 C2 C1 8.9(10) . . . . ?
 Er1 O3 C2 C3 -170.3(8) . . . . ?
 Er1 O4 C15 C14 4.5(11) . . . . ?
 Er1 O4 C15 C16 -176.3(8) . . . . ?
 Er1 O5 C20 C21 11.1(11) . . . . ?
 Er1 O5 C20 C25 -169.3(8) . . . . ?
 Er1 O6 C33 C34 -6.6(12) . . . . ?
 Er1 O6 C33 C38 173.7(7) . . . . ?
 Er1 O7 C21 C20 -9.0(11) . . . . ?
 Er1 O7 C21 C22 169.5(8) . . . . ?
 Er1 O8 C34 C33 7.7(11) . . . . ?
 Er1 O8 C34 C35 -174.7(8) . . . . ?
 Cu1 O1 C1 C2 -171.3(7) . . . . ?
 Cu1 O1 C1 C6 8.3(14) . . . . ?
 Cu1 O2 C14 C15 171.3(7) . . . . ?
 Cu1 O2 C14 C19 -9.0(14) . . . . ?
 Cu1 N1 C7 C6 0(2) . . . . ?
 Cu1 N1 C8 C9 49.0(17) . . . . ?
 Cu1 N1 C8A C9 -41(3) . . . . ?
 Cu1 N2 C12 C9 -47.1(18) . . . . ?
 Cu1 N2 C12A C9 60(2) . . . . ?
 Cu1 N2 C13 C19 -5(3) . . . . ?
 Cu2 O5 C20 C21 171.7(7) . . . . ?
 Cu2 O5 C20 C25 -8.7(14) . . . . ?
 Cu2 O6 C33 C34 -164.8(7) . . . . ?
 Cu2 O6 C33 C38 15.5(14) . . . . ?
 Cu2 N3 C26 C25 3.0(15) . . . . ?
 Cu2 N3 C27 C28 25.0(14) . . . . ?
 Cu2 N4 C31 C28 -55.7(10) . . . . ?
 Cu2 N4 C32 C38 -7.1(15) . . . . ?
 O1 C1 C2 O3 0.3(13) . . . . ?
 O1 C1 C2 C3 179.5(9) . . . . ?
 O1 C1 C6 C5 -179.4(9) . . . . ?
 O1 C1 C6 C7 -0.8(17) . . . . ?
 O2 C14 C15 O4 -3.2(13) . . . . ?
 O2 C14 C15 C16 177.5(9) . . . . ?
 O2 C14 C19 C13 5.0(17) . . . . ?
 O2 C14 C19 C18 -177.0(9) . . . . ?
 O3 C2 C3 C4 178.4(10) . . . . ?
 O4 C15 C16 C17 -177.7(10) . . . . ?
 O5 C20 C21 O7 -1.5(13) . . . . ?
 O5 C20 C21 C22 179.9(9) . . . . ?
 O5 C20 C25 C24 -179.2(9) . . . . ?
 O5 C20 C25 C26 1.4(16) . . . . ?
 O6 C33 C34 O8 -1.0(13) . . . . ?
 O6 C33 C34 C35 -178.7(9) . . . . ?
 O6 C33 C38 C32 1.8(15) . . . . ?
 O6 C33 C38 C37 179.0(9) . . . . ?
 O7 C21 C22 C23 179.8(9) . . . . ?
 O8 C34 C35 C36 -177.7(10) . . . . ?
 N1 C8 C9 C10 47.5(19) . . . . ?
 N1 C8 C9 C11 169.1(13) . . . . ?
 N1 C8 C9 C12 -74.9(17) . . . . ?
 N1 C8A C9 C10A -52(3) . . . . ?
 N1 C8A C9 C11A -169(2) . . . . ?
 N1 C8A C9 C12A 75(3) . . . . ?
 N2 C13 C19 C14 2(2) . . . . ?
 N2 C13 C19 C18 -175.7(16) . . . . ?
 N3 C27 C28 C29 66.0(13) . . . . ?
 N3 C27 C28 C30 -175.0(10) . . . . ?
 N3 C27 C28 C31 -58.0(13) . . . . ?
 N4 C32 C38 C33 -6.3(16) . . . . ?
 N4 C32 C38 C37 176.5(10) . . . . ?
 C1 C2 C3 C4 -0.7(16) . . . . ?
 C1 C6 C7 N1 -3(2) . . . . ?
 C2 C1 C6 C5 0.2(15) . . . . ?
 C2 C1 C6 C7 178.7(10) . . . . ?
 C2 C3 C4 C5 1.4(18) . . . . ?
 C3 C4 C5 C6 -1.3(19) . . . . ?
 C4 C5 C6 C1 0.5(17) . . . . ?
 C4 C5 C6 C7 -178.1(12) . . . . ?
 C5 C6 C7 N1 175.2(14) . . . . ?
 C6 C1 C2 O3 -179.3(9) . . . . ?
 C6 C1 C2 C3 -0.1(15) . . . . ?
 C7 N1 C8 C9 -148.6(14) . . . . ?
 C7 N1 C8A C9 162.2(19) . . . . ?
 C8 N1 C7 C6 -161.2(13) . . . . ?
 C8 C9 C12 N2 73.1(17) . . . . ?
 C8A N1 C7 C6 155.4(19) . . . . ?
 C8A C9 C12A N2 -86(3) . . . . ?
 C10 C9 C12 N2 -52.3(17) . . . . ?
 C10A C9 C12A N2 38(3) . . . . ?
 C11 C9 C12 N2 -168.7(13) . . . . ?
 C11A C9 C12A N2 161(2) . . . . ?
 C12 N2 C13 C19 158.2(15) . . . . ?
 C12A N2 C13 C19 -148.9(18) . . . . ?
 C13 N2 C12 C9 148.6(15) . . . . ?
 C13 N2 C12A C9 -151.0(19) . . . . ?
 C14 C15 C16 C17 1.6(15) . . . . ?
 C15 C14 C19 C13 -175.3(11) . . . . ?
 C15 C14 C19 C18 2.7(15) . . . . ?
 C15 C16 C17 C18 -1.4(16) . . . . ?
 C16 C17 C18 C19 1.9(16) . . . . ?
 C17 C18 C19 C13 175.5(11) . . . . ?
 C17 C18 C19 C14 -2.6(15) . . . . ?
 C19 C14 C15 O4 177.1(9) . . . . ?
 C19 C14 C15 C16 -2.2(15) . . . . ?
 C20 C21 C22 C23 -1.7(15) . . . . ?
 C20 C25 C26 N3 1.3(17) . . . . ?
 C21 C20 C25 C24 0.4(15) . . . . ?
 C21 C20 C25 C26 -179.0(9) . . . . ?
 C21 C22 C23 C24 2.5(16) . . . . ?
 C22 C23 C24 C25 -1.8(16) . . . . ?
 C23 C24 C25 C20 0.4(16) . . . . ?
 C23 C24 C25 C26 179.8(10) . . . . ?
 C24 C25 C26 N3 -178.1(10) . . . . ?
 C25 C20 C21 O7 178.9(9) . . . . ?
 C25 C20 C21 C22 0.3(15) . . . . ?
 C26 N3 C27 C28 -157.8(10) . . . . ?
 C27 N3 C26 C25 -174.1(10) . . . . ?
 C27 C28 C31 N4 75.8(11) . . . . ?
 C29 C28 C31 N4 -49.9(12) . . . . ?
 C30 C28 C31 N4 -167.4(9) . . . . ?
 C31 N4 C32 C38 174.2(10) . . . . ?
 C32 N4 C31 C28 123.0(10) . . . . ?
 C33 C34 C35 C36 -0.3(16) . . . . ?
 C34 C33 C38 C32 -177.9(9) . . . . ?
 C34 C33 C38 C37 -0.7(14) . . . . ?
 C34 C35 C36 C37 -0.7(17) . . . . ?
 C35 C36 C37 C38 1.1(17) . . . . ?
 C36 C37 C38 C32 176.9(10) . . . . ?
 C36 C37 C38 C33 -0.4(16) . . . . ?
 C38 C33 C34 O8 178.7(8) . . . . ?
 C38 C33 C34 C35 1.0(15) . . . . ?
 Er2 O9 C58 C59 0.9(12) . . . . ?
 Er2 O9 C58 C63 -177.5(7) . . . . ?
 Er2 O10 C71 C72 12.4(13) . . . . ?
 Er2 O10 C71 C76 -168.4(8) . . . . ?
 Er2 O11 C59 C58 -0.6(11) . . . . ?
 Er2 O11 C59 C60 178.1(8) . . . . ?
 Er2 O12 C72 C71 -8.4(12) . . . . ?
 Er2 O12 C72 C73 171.5(8) . . . . ?
 Er2 O13 C39 C40 13.7(11) . . . . ?
 Er2 O13 C39 C44 -168.4(7) . . . . ?
 Er2 O14 C52 C53 -3.1(12) . . . . ?
 Er2 O14 C52 C57 177.2(7) . . . . ?
 Er2 O15 C40 C39 -9.3(12) . . . . ?
 Er2 O15 C40 C41 169.6(8) . . . . ?
 Er2 O16 C53 C52 2.0(11) . . . . ?
 Er2 O16 C53 C54 -178.6(7) . . . . ?
 Cu4 O13 C39 C40 178.5(7) . . . . ?
 Cu4 O13 C39 C44 -3.6(14) . . . . ?
 Cu4 O14 C52 C53 -174.2(7) . . . . ?
 Cu4 O14 C52 C57 6.2(14) . . . . ?
 Cu4 N5 C45 C44 6.6(16) . . . . ?
 Cu4 N5 C46 C47 43.3(12) . . . . ?
 Cu4 N6 C50 C47 -41.4(12) . . . . ?
 Cu4 N6 C51 C57 -1.7(16) . . . . ?
 Cu3 O9 C58 C59 -164.3(7) . . . . ?
 Cu3 O9 C58 C63 17.2(14) . . . . ?
 Cu3 O10 C71 C72 171.9(7) . . . . ?
 Cu3 O10 C71 C76 -8.8(15) . . . . ?
 Cu3 O21 N10 O22 116.7(13) . . . . ?
 Cu3 O21 N10 O23 -65.5(15) . . . . ?
 Cu3 N7 C64 C63 -8.1(16) . . . . ?
 Cu3 N7 C65 C66 5.5(13) . . . . ?
 Cu3 N8 C69 C66 -51.5(11) . . . . ?
 Cu3 N8 C70 C76 0.1(16) . . . . ?
 O9 C58 C59 O11 -0.2(13) . . . . ?
 O9 C58 C59 C60 -179.0(9) . . . . ?
 O9 C58 C63 C62 177.8(9) . . . . ?
 O9 C58 C63 C64 1.8(16) . . . . ?
 O10 C71 C72 O12 -2.1(14) . . . . ?
 O10 C71 C72 C73 178.0(10) . . . . ?
 O10 C71 C76 C70 2.2(17) . . . . ?
 O10 C71 C76 C75 -178.4(10) . . . . ?
 O11 C59 C60 C61 -177.2(10) . . . . ?
 O12 C72 C73 C74 -178.9(10) . . . . ?
 O13 C39 C40 O15 -3.0(13) . . . . ?
 O13 C39 C40 C41 177.9(9) . . . . ?
 O13 C39 C44 C43 -179.8(9) . . . . ?
 O13 C39 C44 C45 -7.6(16) . . . . ?
 O14 C52 C53 O16 0.6(13) . . . . ?
 O14 C52 C53 C54 -178.9(9) . . . . ?
 O14 C52 C57 C51 1.0(15) . . . . ?
 O14 C52 C57 C56 178.2(9) . . . . ?
 O15 C40 C41 C42 -177.0(10) . . . . ?
 O16 C53 C54 C55 -179.4(10) . . . . ?
 N5 C46 C47 C48 55.8(13) . . . . ?
 N5 C46 C47 C49 174.7(9) . . . . ?
 N5 C46 C47 C50 -70.0(12) . . . . ?
 N6 C51 C57 C52 -3.4(17) . . . . ?
 N6 C51 C57 C56 179.3(11) . . . . ?
 N7 C65 C66 C67 72.7(12) . . . . ?
 N7 C65 C66 C68 -169.0(9) . . . . ?
 N7 C65 C66 C69 -52.7(12) . . . . ?
 N8 C70 C76 C71 2.4(18) . . . . ?
 N8 C70 C76 C75 -177.0(10) . . . . ?
 C39 C40 C41 C42 1.9(15) . . . . ?
 C39 C44 C45 N5 5.9(17) . . . . ?
 C40 C39 C44 C43 -2.0(15) . . . . ?
 C40 C39 C44 C45 170.2(9) . . . . ?
 C40 C41 C42 C43 -1.8(16) . . . . ?
 C41 C42 C43 C44 -0.3(16) . . . . ?
 C42 C43 C44 C39 2.1(15) . . . . ?
 C42 C43 C44 C45 -170.2(10) . . . . ?
 C43 C44 C45 N5 177.8(10) . . . . ?
 C44 C39 C40 O15 179.0(9) . . . . ?
 C44 C39 C40 C41 0.0(15) . . . . ?
 C45 N5 C46 C47 -139.9(10) . . . . ?
 C46 N5 C45 C44 -170.0(10) . . . . ?
 C46 C47 C50 N6 69.4(12) . . . . ?
 C48 C47 C50 N6 -56.6(13) . . . . ?
 C49 C47 C50 N6 -174.0(10) . . . . ?
 C50 N6 C51 C57 172.2(10) . . . . ?
 C51 N6 C50 C47 144.3(10) . . . . ?
 C52 C53 C54 C55 0.1(15) . . . . ?
 C53 C52 C57 C51 -178.6(9) . . . . ?
 C53 C52 C57 C56 -1.4(14) . . . . ?
 C53 C54 C55 C56 -0.3(16) . . . . ?
 C54 C55 C56 C57 -0.3(17) . . . . ?
 C55 C56 C57 C51 178.5(10) . . . . ?
 C55 C56 C57 C52 1.2(15) . . . . ?
 C57 C52 C53 O16 -179.8(8) . . . . ?
 C57 C52 C53 C54 0.8(14) . . . . ?
 C58 C59 C60 C61 1.4(16) . . . . ?
 C58 C63 C64 N7 -6.1(18) . . . . ?
 C59 C58 C63 C62 -0.6(15) . . . . ?
 C59 C58 C63 C64 -176.6(10) . . . . ?
 C59 C60 C61 C62 -1.3(17) . . . . ?
 C60 C61 C62 C63 0.2(18) . . . . ?
 C61 C62 C63 C58 0.7(16) . . . . ?
 C61 C62 C63 C64 176.9(11) . . . . ?
 C62 C63 C64 N7 178.0(11) . . . . ?
 C63 C58 C59 O11 178.3(9) . . . . ?
 C63 C58 C59 C60 -0.5(15) . . . . ?
 C64 N7 C65 C66 178.8(10) . . . . ?
 C65 N7 C64 C63 178.6(11) . . . . ?
 C65 C66 C69 N8 79.5(11) . . . . ?
 C67 C66 C69 N8 -45.2(12) . . . . ?
 C68 C66 C69 N8 -164.3(9) . . . . ?
 C69 N8 C70 C76 -179.8(10) . . . . ?
 C70 N8 C69 C66 128.4(10) . . . . ?
 C71 C72 C73 C74 1.0(17) . . . . ?
 C72 C71 C76 C70 -178.6(10) . . . . ?
 C72 C71 C76 C75 0.8(16) . . . . ?
 C72 C73 C74 C75 -0.2(17) . . . . ?
 C73 C74 C75 C76 -0.2(18) . . . . ?
 C74 C75 C76 C70 179.4(10) . . . . ?
 C74 C75 C76 C71 -0.1(17) . . . . ?
 C76 C71 C72 O12 178.7(9) . . . . ?
 C76 C71 C72 C73 -1.3(16) . . . . ?

_shelx_SHELXL_version_number      '2014/7'
_olex2_submission_special_instructions 'No special instructions were received'
